# Supplementary material for: Nanosurface-induced construction of NiCoP–CoP heterostructure nanobristle electrodes for highly efficient alkaline hydrogen evolution reaction
Source: Royal Society of Chemistry journal article supplement (doi:10.1039/d3ta04920e), 2023-01-01
Supplement: d3ta04920e1.pdf [file d3ta04920e1.pdf]

## Electronic Supplementary Information

### Nanosurface-induced construction of NiCoP-CoP heterostructure nanobristle electrodes for highly efficient alkaline hydrogen evolution reaction

Peng Liu<sup>1,2,3,#</sup>, Juan Wang<sup>1,#</sup>, Yiming Sui<sup>4</sup>, Guangyao Zhao<sup>1,2</sup>, Rui Yao<sup>1</sup>, Dongsheng Xia<sup>1</sup>, Zhenbin Guo<sup>5</sup>, Feiyu Kang<sup>1,2</sup>, Lei Wang<sup>6,\*</sup>, Cheng Yang<sup>1,\*</sup>

1. Institute of Materials Research, Tsinghua Shenzhen International Graduate School, Tsinghua University, Shenzhen 518055, China

2. School of Materials Science and Engineering, Tsinghua University, Beijing 100084, China

3. China Huaneng Clean Energy Research Institute, Beijing 102209, China

4. Department of Chemistry, Oregon State University, Corvallis, OR, 97331-4003, United States

5. Institute of Semiconductor Manufacturing Research, Shenzhen University, Shenzhen, Guangdong 518060, P.R. China

6. School of Materials and Environmental Engineering, Institute of Urban Ecology and Environment Technology, Shenzhen Polytechnic, Shenzhen 518055, China

<sup>#</sup>These authors contribute equally to this work.

\*Email: yang.cheng@sz.tsinghua.edu.cn, wangleicraes@163.com

### Experimental section

#### Materials preparation.

(a) *Preparation of nickel nanowire arrays (NNA)*. The solution A consists of 0.1 M NiCl<sub>2</sub>, 0.2 mM chloroplatinic acid (H<sub>2</sub>PtCl<sub>6</sub>, heterogeneous nucleating agent), 38 mM disodium citrate (Na<sub>2</sub>C<sub>6</sub>H<sub>5</sub>O<sub>7</sub>, complexing agent), and the pH is adjusted to 12.5 with 6 M KOH and heated to 80 °C. Liquid B contains 0.1 M hydrazine hydrate solution and the pH is adjusted to 12.5 with 6 M KOH and heated to 80 °C. Nickel foam (NF) and nickel plate (the nickel plate was manually polished by sandpaper of 500 mesh for 30 s for controlling the surface roughness) were placed in the container with ethanol and dilute hydrochloric acid solution and cleaned by ultrasonic cleaner for 5 minutes. Mixed

the solution A and B in the container together and put them into the NF. Then the container was placed between the poles of the Helmholtz coil and kept the temperature at 80 °C. Turned on the Helmholtz machine and adjust the magnetic induction intensity to 0.5 T (Tesla). After a 1-h reaction, turned off the machine and took the sample out. Washed the sample with deionized water and dried it in an oven. Caution! Hydrazine hydration is poisonous and its usage should be operated in a ventilated environment.

*(b) Preparation of metallic phosphide.* The nickel plate was mechanically polished and the carbon cloth was cleaned by plasma in an air atmosphere for 2 minutes. Then the substrates (including nickel foam) were ultrasonicated in 1 M HCl solution for 5 minutes and in 95 wt.% alcohol for 5 minutes. We first prepared the cobalt carbonate hydroxide hydrate- $\text{Co}(\text{CO}_3)_{0.5}(\text{OH})\cdot 0.11\text{H}_2\text{O}$  (CCHH) by using 0.15 g  $\text{Co}(\text{NO}_3)_2\cdot 6\text{H}_2\text{O}$ , 0.15 g  $\text{CO}(\text{NH}_2)_2$  (urea) and deionized water to prepare 10 mL reaction solution and putting into the substrate of nickel foam, nickel plate, carbon cloth and NNA. The 15 mL glass bottles with open pores were used as reaction containers and were put into Binder oven for 10 h at 95 °C. Then we obtained the phosphides by argon-atmosphere heat treatment in a tubular furnace. 0.5 g  $\text{NaH}_2\text{PO}_2$  was placed in a porcelain boat close to the gas inlet and the hydroxides were placed close to the gas outlet. The saturated  $\text{CuSO}_4$  solution was used to absorb poisonous phosphorus containing tail gas. The argon gas flow bubbled twice per second. The temperature rose 5 °C per minute and was kept at 300°C for 1.5 hours. We use the solution containing 0.075 g  $\text{Co}(\text{NO}_3)_2\cdot 6\text{H}_2\text{O}$  and 0.075 g  $\text{Ni}(\text{NO}_3)_2\cdot 6\text{H}_2\text{O}$  to prepare NiCoP and the one containing 0.15 g  $\text{Ni}(\text{NO}_3)_2\cdot 6\text{H}_2\text{O}$  to prepare NiP by the same process as preparing CoP.

Calculation of active material loading (m):

$$m=M/M_1$$

where M is the mass of the sample after phosphating minus the mass of the unreacted substrate,  $M_1$  is and the mass fraction of Co and P in NiCoP-CoP.

*(c) Preparation of Pt/C@NF.* The preparation method for Pt/C electrode loaded with foam nickel is to weigh 45 mg commercial Pt/C powder and pour 50  $\mu$  L Nafion, 500  $\mu$  L ethanol and 450  $\mu$  L deionized water and sonicate for 60 minutes to obtain a uniformly dispersed suspension. Then, cut a piece of foam nickel, soak foam nickel with 2 M HCl ultrasonic for 20 minutes to remove the nickel oxide layer on the surface, and then rinse it several times with deionized water and acetone and dry it.

Then immerse the cleaned foam nickel in the above suspension and dry it in the air at 60 °C for 4 hours. Finally, the loading of the Pt/C catalyst was measured to be approximately 37 mg cm<sup>-2</sup>.

### **Structural and Electrochemical Characterizations.**

The macro morphology and energy dispersive X-Ray spectroscopy (EDS) of catalysts was characterized by field emission scanning electron microscopy (FE-SEM, SAPHIRE SUPRA 55). The micromorphology, high-resolution transmission electron microscope (HRTEM) image, and EDS of catalysts were obtained by the TEM of JEOL ARM 200F and JEOL JEM-3200FS, made in Japan. Crystallographic information was obtained with X-ray diffraction (Bruker DSRINT2000/PC, Germany) using Cu K $\alpha$  radiation with  $\lambda=1.5418$  Å (at a diffraction angle ranging from 20° to 80° at a scan rate of 5°/min). The X-ray photoelectron spectra (XPS) were measured with Al-K $\alpha$  radiation (50 W, 15 kV) (ESCALABSB 250 Xi). The shift of binding energy due to relative surface charging was corrected using the C 1 s level at 284.8 eV as an internal standard.

Electrochemical measurements were conducted with the electrochemical working station (CHI 660E) in a three-electrode electrochemical setup. A 1 M KOH solution was used as the electrolyte, and a Hg/HgO electrode (in 1 M KOH) and graphite rod (with a diameter of 8 mm) were used as reference and counter electrodes, respectively. The as-prepared electrodes supported on Ni foam were utilized as the working electrode. The working area was tailored to 0.4 cm<sup>2</sup>. The relation between the Hg/HgO reference and RHE in 1 M KOH solution follows the Equation  $E_{\text{RHE}} = E_{\text{Hg/HgO}} + 0.955$  V, whose value is calibrated by reversible hydrogen electrode. The iR compensation was performed by automatic current interrupt method with a value of 95%  $\times$  Ru for HER through the CH instrument 660E working station. Polarization curves were obtained from linear sweep voltammetry (LSV) test with a 5 mV s<sup>-1</sup> scan rate. Tafel slopes were calculated using the polarization curves by plotting overpotential against log (current density). Chronopotentiometry measurements were performed to evaluate the long-term stability. The ECSA was determined by measuring the capacitive current associated with double-layer charging from the scan-rate dependence of CVs. The scan rates were 20, 40, 60, 80, and 100 mV s<sup>-1</sup>. The double-layer capacitance ( $C_{\text{dl}}$ ) was estimated by plotting the  $\Delta j = (j_{\text{a}} - j_{\text{c}})$  at 0.87 V vs RHE against the scan rate. The linear

slope is twice the double layer capacity. The ECSA values were calculated from the measured double layer capacitance divided by the specific capacitance of an atomically smooth material ( $C_{dl}'$ ,  $\sim 40 \mu\text{F cm}^{-2}$ ):  $\text{ECSA} = C_{dl} / C_{dl}' \times S$ , where  $S$  is the actual surface area of the electrode. The electrochemical impedance spectroscopies (EIS) measurement was conducted at  $-0.1 \text{ V}$  (vs. RHE) in the frequency range from  $100 \text{ kHz}$  to  $0.01 \text{ Hz}$  with an amplitude of  $5 \text{ mV}$ .

### **Density Functional Theory Calculations.**

All the first-principle density functional theory (DFT) calculations were performed by Vienna Ab-initio Simulation Package (VASP) [1-3]. The Perdew-Burke-Ernzerh (PBE) in the generalized gradient approximation (GGA) was applied to describe the exchange-correlation function [4, 5]. Based on the plane wave method, the projector augmented-wave (PAW) method with an energy cutoff of  $400 \text{ eV}$  was implemented for the electron-ion interactions [6, 7]. The van der Waals interaction was taken into account using DFT-D3 method with Becke-Jonson damping dispersion correction. All structures were fully relaxed until the electronic energy and force acting on atom were smaller than  $10^{-4} \text{ eV}$  and  $0.05 \text{ eV} \cdot \text{\AA}^{-1}$ , respectively. The Brillouin-zone sampling was conducted using Monkhorst-Pack (MP) grids of special points with a separation of  $0.04 \text{ \AA}^{-1}$ . A Gaussian smearing of  $0.05 \text{ eV}$  was applied to speed up self-consistent field iteration. A vacuum height of  $15 \text{ \AA}$  along the vertical direction was selected to avoid the unwanted interaction between the slab and its period images. The optimized structures were illustrated with VESTA software [8]. The coordinates of all computed models of both the catalysts and intermediates can be found in the Appendix at the end of Supporting Information.

According to the latest reference [9],  $\text{Co}(\text{CO}_3)_{0.5}(\text{OH}) \cdot 0.11 \text{H}_2\text{O}$  should be  $\text{Co}_6(\text{CO}_3)_2(\text{OH})_8 \cdot \text{H}_2\text{O}$ . The 2-layer slab model of  $\text{Co}_6(\text{CO}_3)_2(\text{OH})_8 \cdot \text{H}_2\text{O}$  (001) was used to build the  $\text{Ni}_{\text{bulk}}\text{-CCHH}$  and  $\text{Ni}_{\text{cluster}}\text{-CCHH}$  model. The bulk Ni was considered as the infinite 3-layer of Ni(111) slab, and the Ni cluster was considered as a Ni13 cluster with a diameter of  $0.8 \text{ nm}$ , as shown in Figure 5a-b. The Ni vacancy formation energy of  $\text{Ni}_{\text{bulk}}\text{-CCHH}$  ( $E_{\text{Ni-bulk}}$ ) and  $\text{Ni}_{\text{cluster}}\text{-CCHH}$  ( $E_{\text{Ni-cluster}}$ ) of the structures was calculated through:

$$E_{\text{Ni-bulk}} = E_{\text{Ni-Vac}} + E_{\text{Ni}} - E_{\text{perfect}}$$

Where,  $E_{\text{Ni-Vac}}$  and  $E_{\text{perfect}}$  are the energies of defective (with an Ni vacancy) and undefective models, respectively, and  $E_{\text{Ni}}$  is the energy of an isolated Ni atoms (treated as 0 eV in VASP).

$$E_{\text{Ni-cluster}} = E_{\text{Ni12}} + E_{\text{Ni}} - E_{\text{Ni13}}$$

Where,  $E_{\text{Ni12}}$  and  $E_{\text{Ni13}}$  are the energies of Ni<sub>12</sub>-CCHH and Ni<sub>13</sub>-CCHH model, respectively.

| Model                    | $E_{\text{Ni-Vac}}$ (eV) | $E_{\text{perfect}}$ (eV) | Ni vacancy formation energy(eV) |
|--------------------------|--------------------------|---------------------------|---------------------------------|
| Ni <sub>bulk</sub> -CCHH | -1129.77                 | -1135.16                  | 5.39                            |

  

| Model                       | $E_{\text{Ni12}}$ (eV) | $E_{\text{Ni13}}$ (eV) | Ni vacancy formation energy(eV) |
|-----------------------------|------------------------|------------------------|---------------------------------|
| Ni <sub>cluster</sub> -CCHH | -953.00                | -957.04                | 4.04                            |

#### References:

- [1]. G. Kresse, J. Hafner, Phys. Rev. 1993, 47, 558.
- [2]. G. Kresse, J. Furthmuller, Phys. Rev. 1996, 54, 11169.
- [3]. G. Kresse, J. Furthmuller, Comput. Mater. Sci. 1996, 6, 15.
- [4]. J. P. Perdew, Y. Wang, Phys. Rev. B 1992, 45, 13244.
- [5]. J. P. Perdew, K. Burke, Phys., Rev. Lett. 1996, 77, 3865.
- [6]. P. E. Blöchl, Phys. Rev. B 1994, 50, 17953.
- [7]. G. Kress, D. Joubert, Phys. Rev. B 1999, 59, 1758.
- [8]. K. Momma, Izumi, F. J. Appl. Crystallogr. 2011, 44, 1272.
- [9]. Acta Cryst. 2019. C75, 61-64

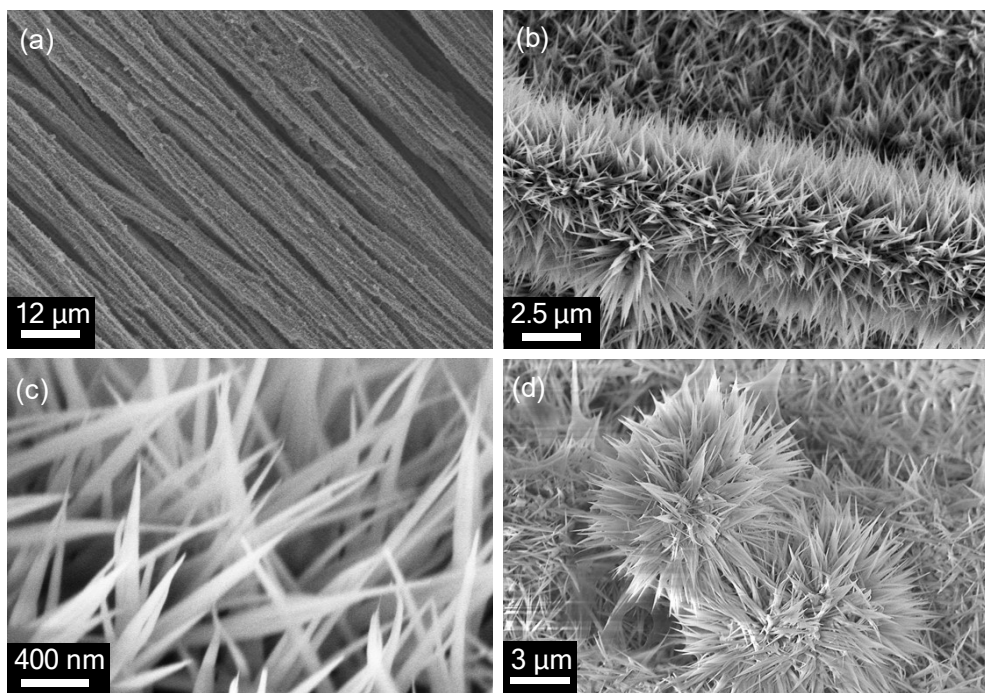

Figure S1. (a-d) SEM images of CCHH@NNA precursor.

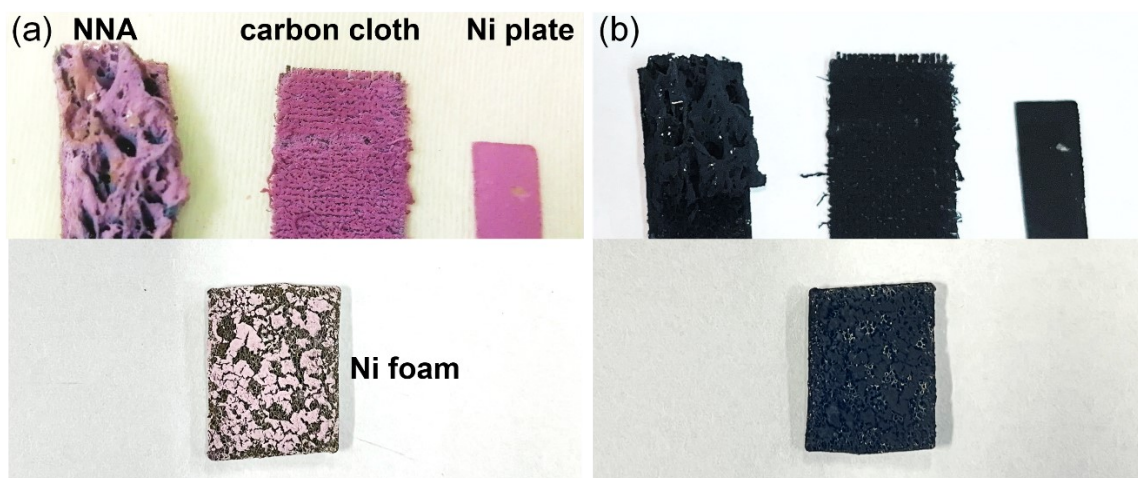

Figure S2. Optical images of (a) CCHH on NNA, carbon cloth, Ni foam, and Ni plate and (b) their corresponding phosphides

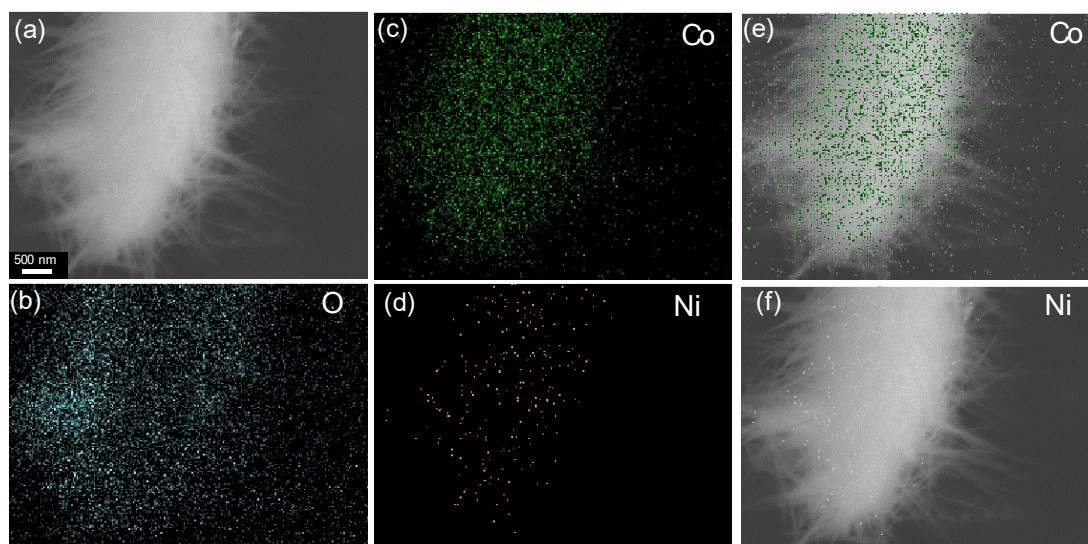

Figure S3. (a) SEM image and (b-d) corresponding EDS mapping image of CCHH@NNA precursor. The overlays of the SEM image and (e) Co and (f) Ni EDS mapping images and (f), respectively.



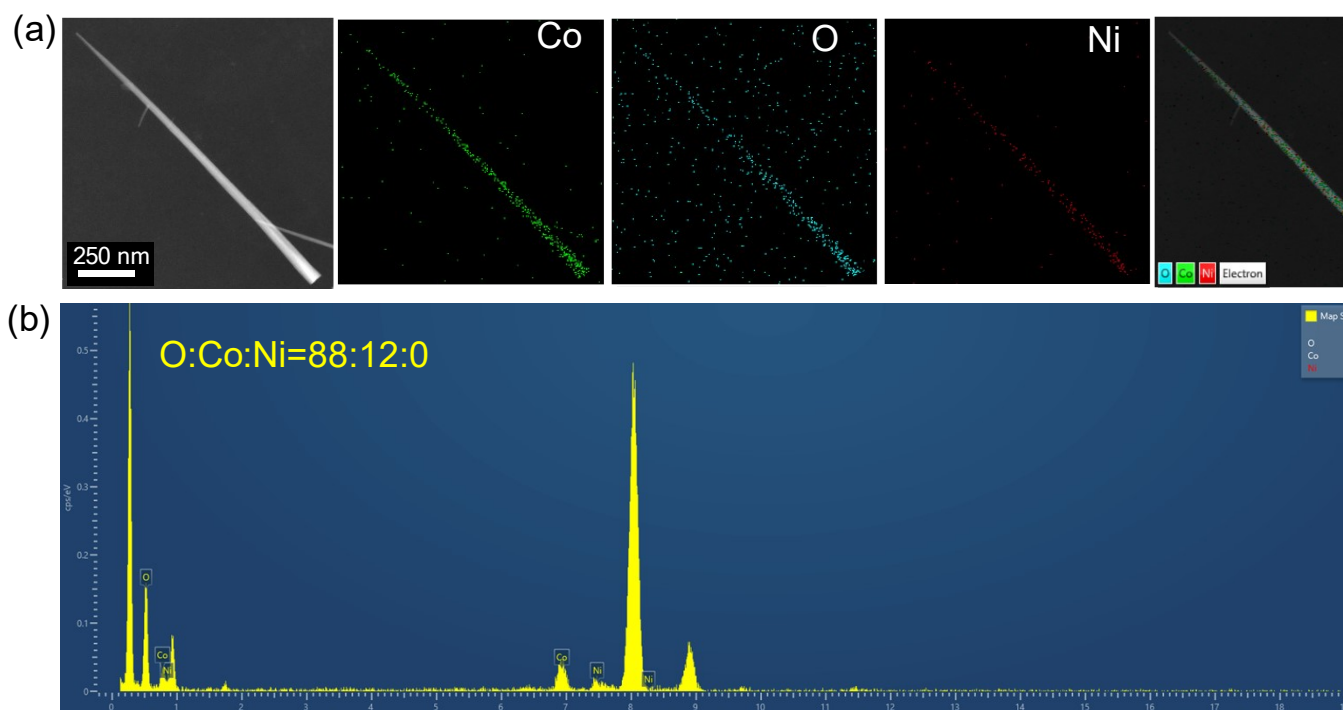

Figure S4. (a) TEM image and corresponding EDS mapping images of CCHH@NNA precursor and (b) the corresponding EDS quantitative analysis.

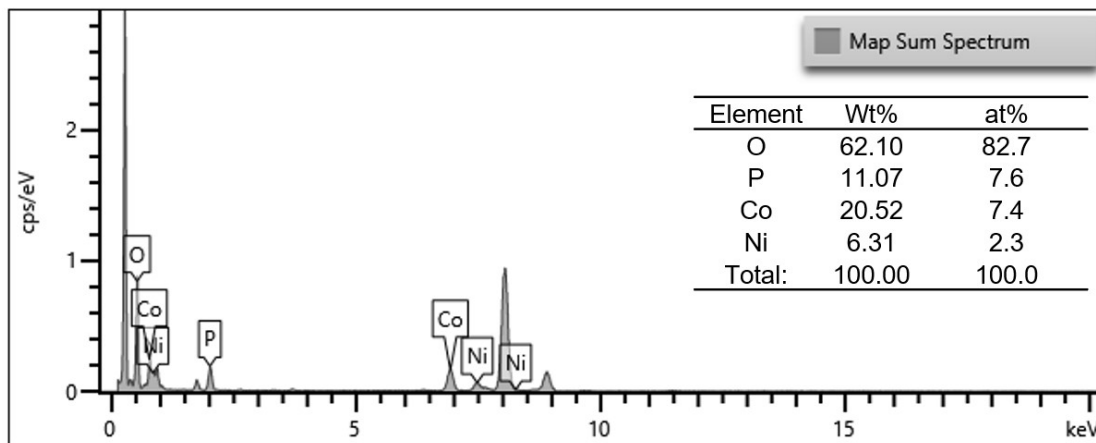

Figure S5. The corresponding EDS quantitative analysis of NiCoP-CoP@NNA in Figure 2h.

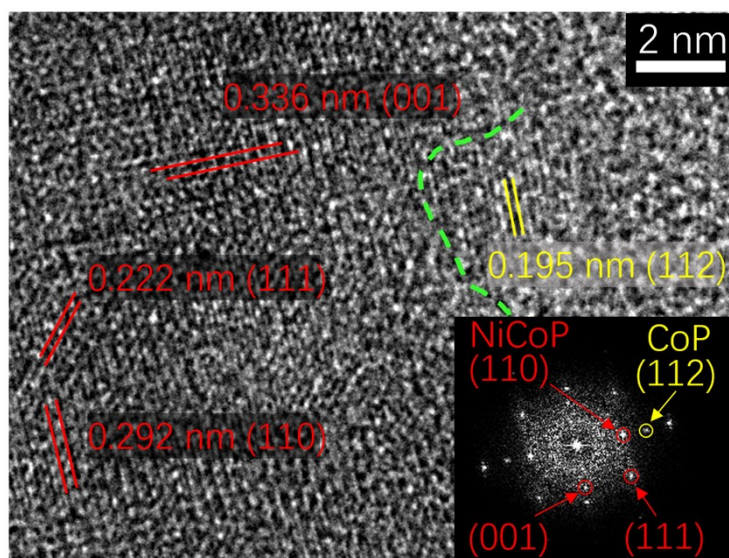

Figure S6. HRTEM of NiCoP-CoP@NNA and the fast Fourier transform (FFT) pattern of this area.

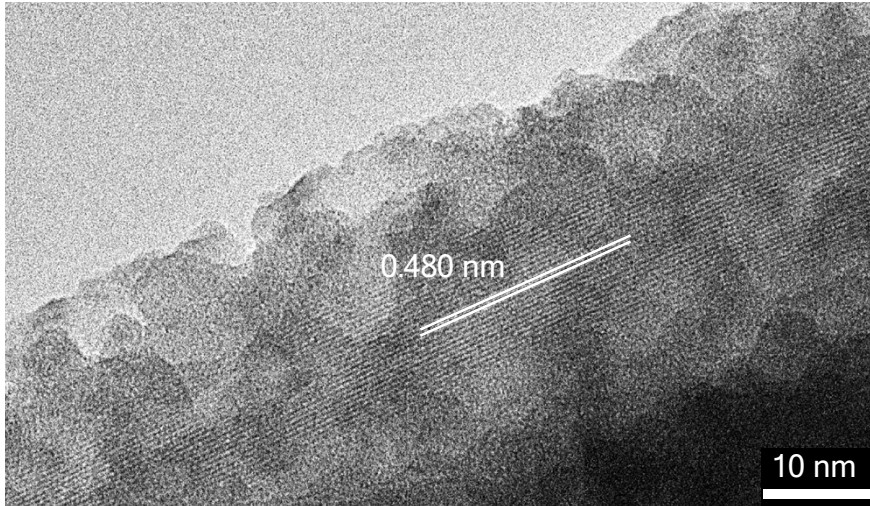

Figure S7. The HRTEM image of NiCoP-CoP@NNA surface.

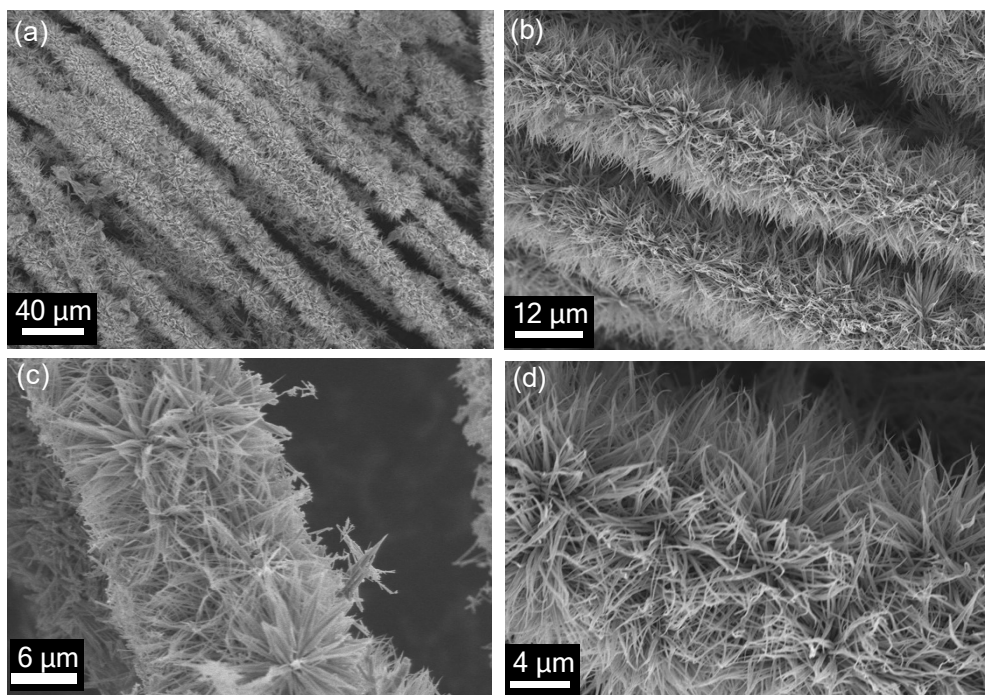

Figure S8. SEM images of CoP@carbon cloth.

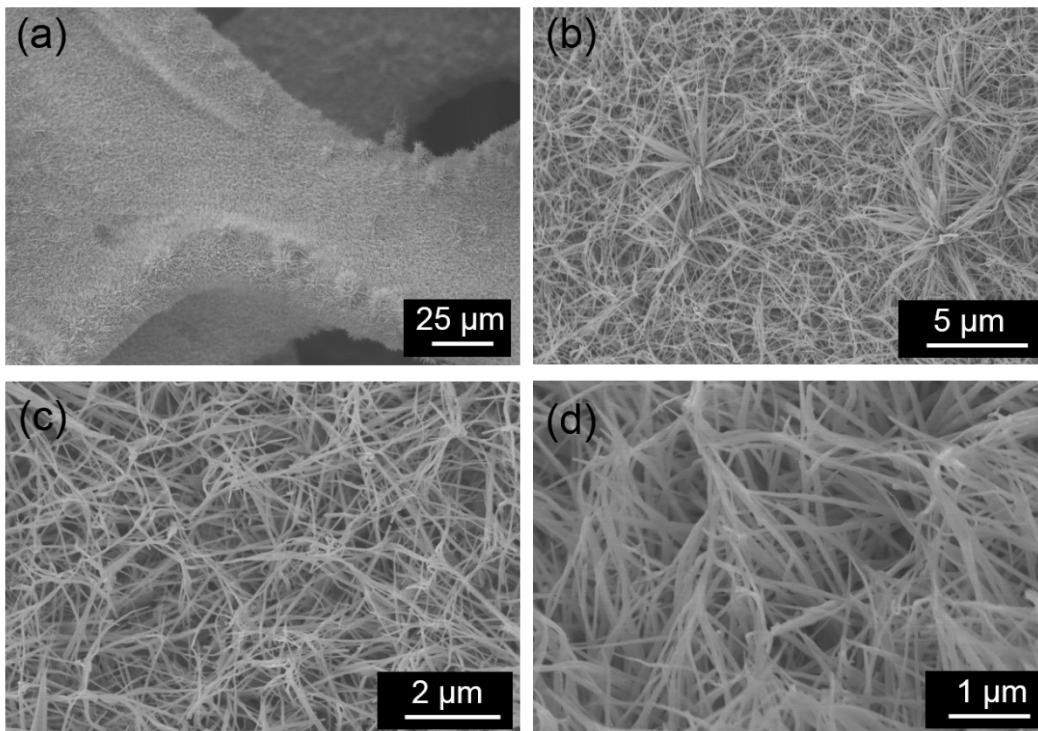

Figure S9. SEM images of CoP@NF.

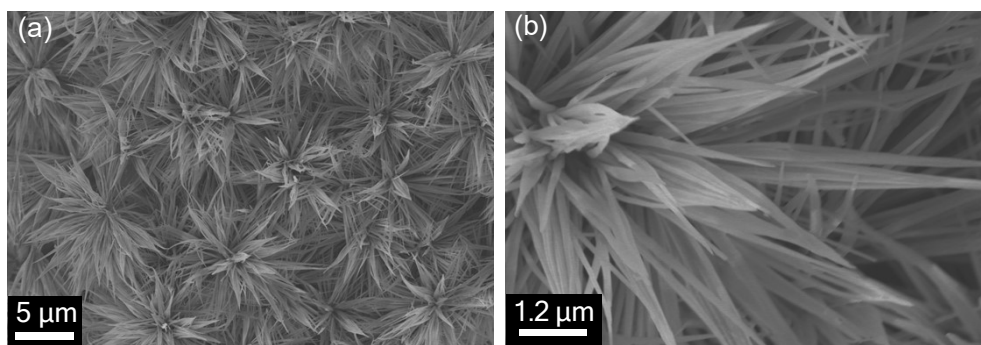

Figure S10. SEM images of CoP@Ni plate.

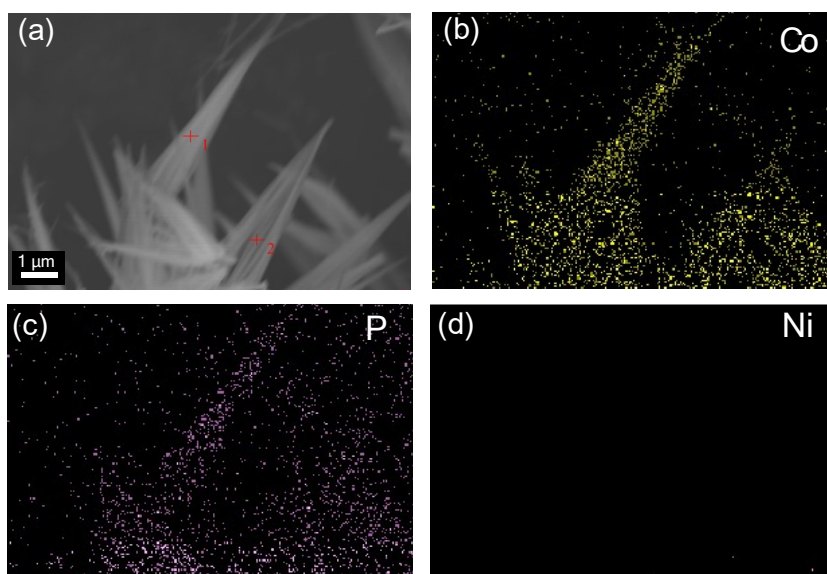

Figure S11. SEM image of CoP@Ni plate and corresponding EDS mapping images.



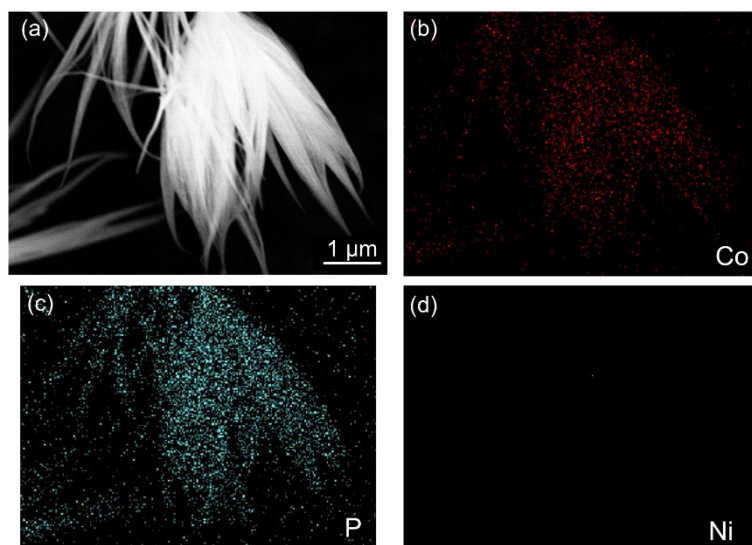

Figure S12. SEM image of CoP@NF and corresponding EDS mapping images.

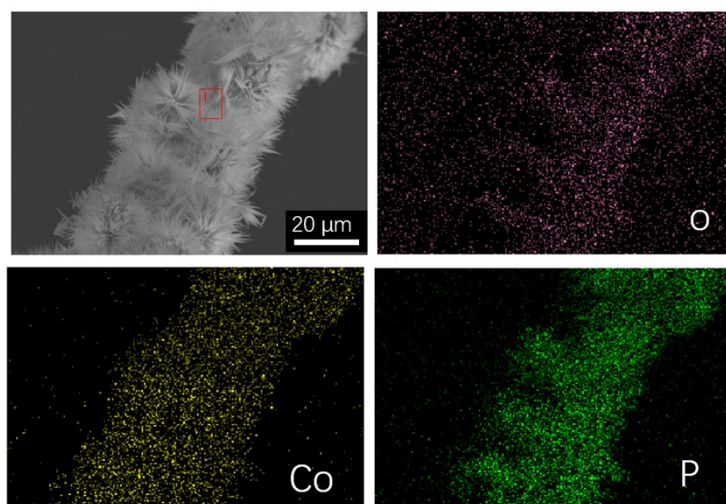

Figure S13. SEM image of CoP@carbon cloth and corresponding EDS mapping images.

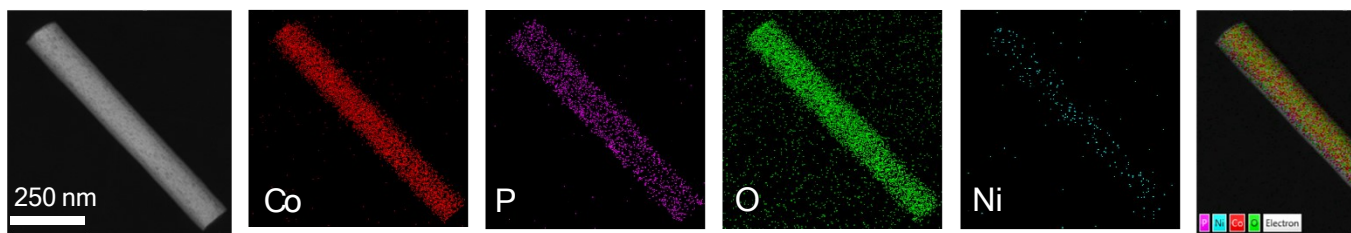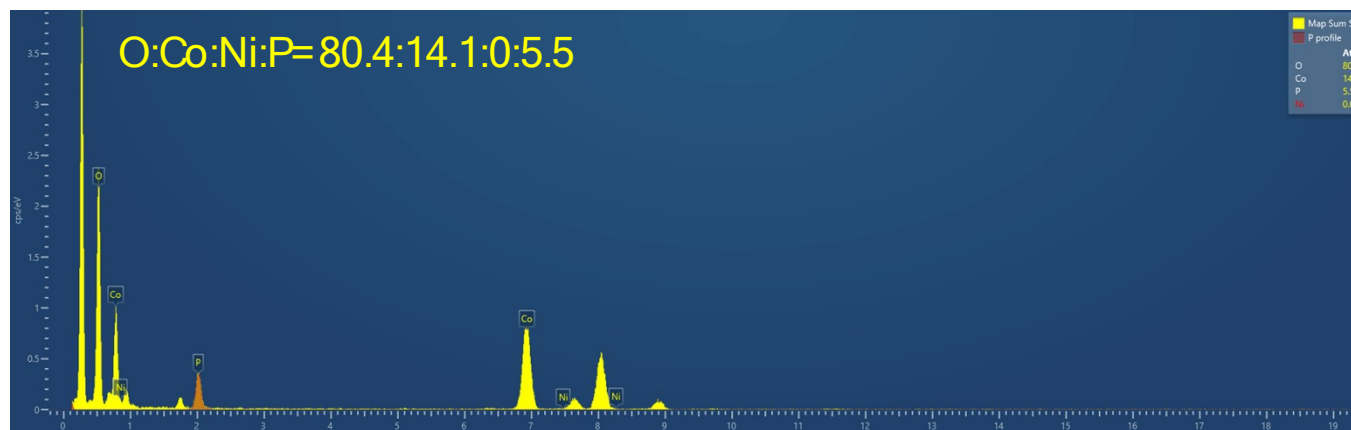

Figure S14. TEM image of CoP@Ni plate and its corresponding EDS mapping images of Co, Ni, P, O and their mixture and quantitative results.

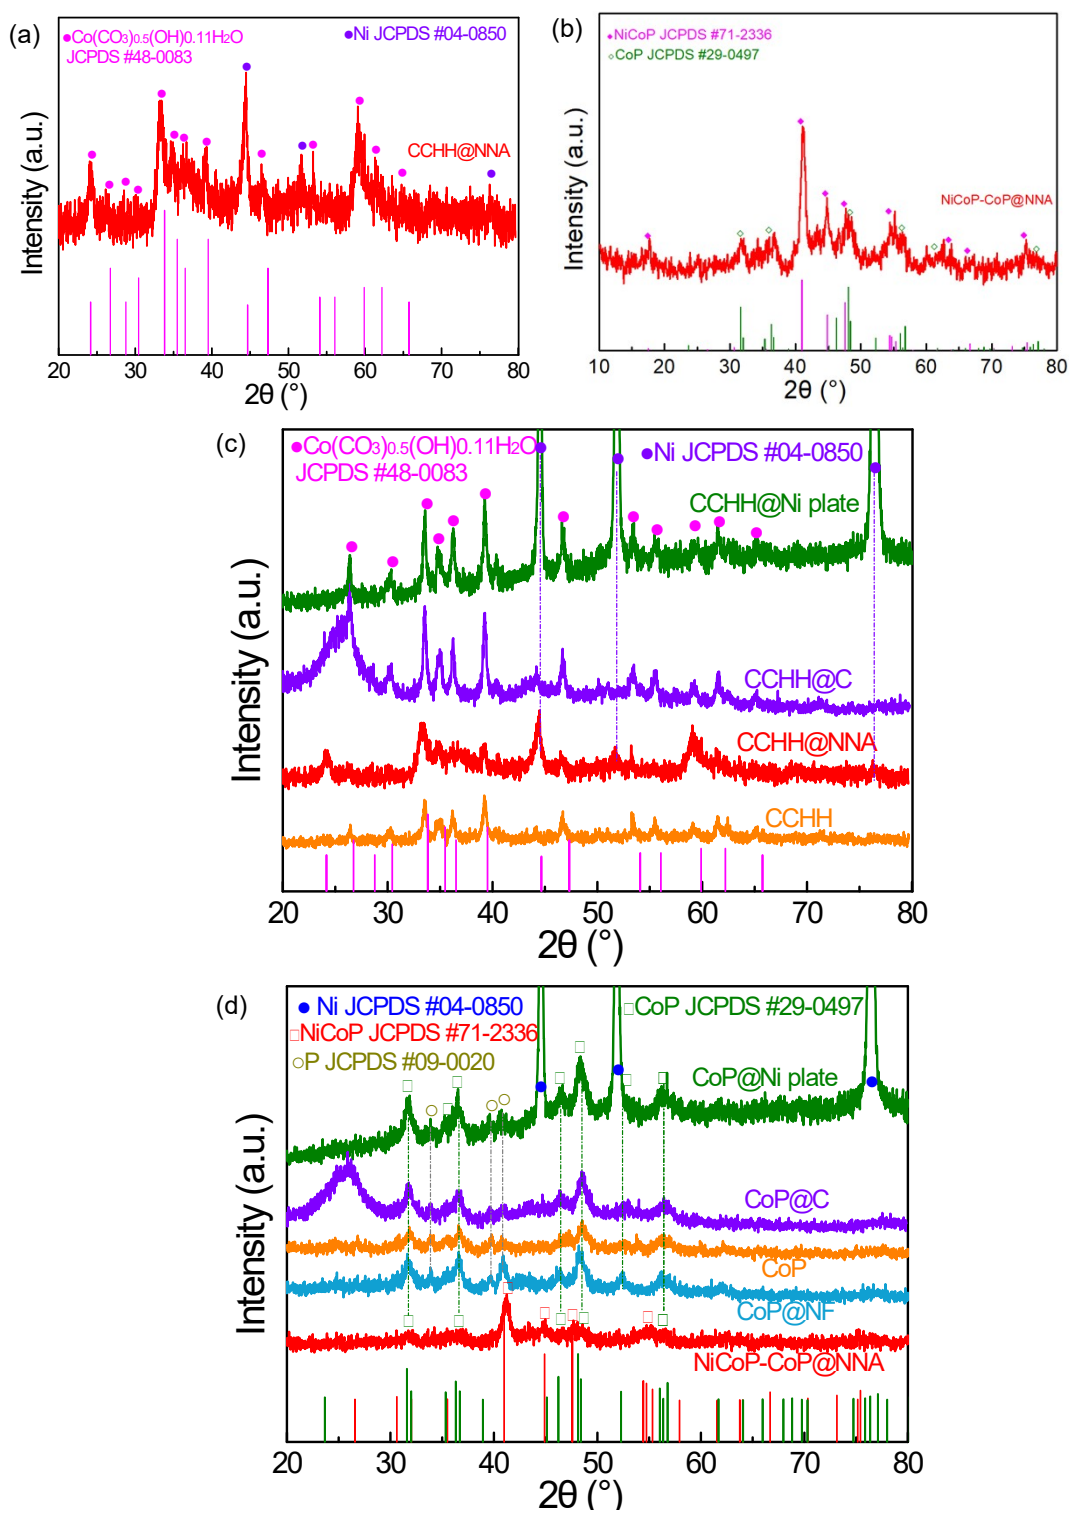

Figure S15. Enlarged and high-resolution XRD spectra of Figure 3a and 3b.

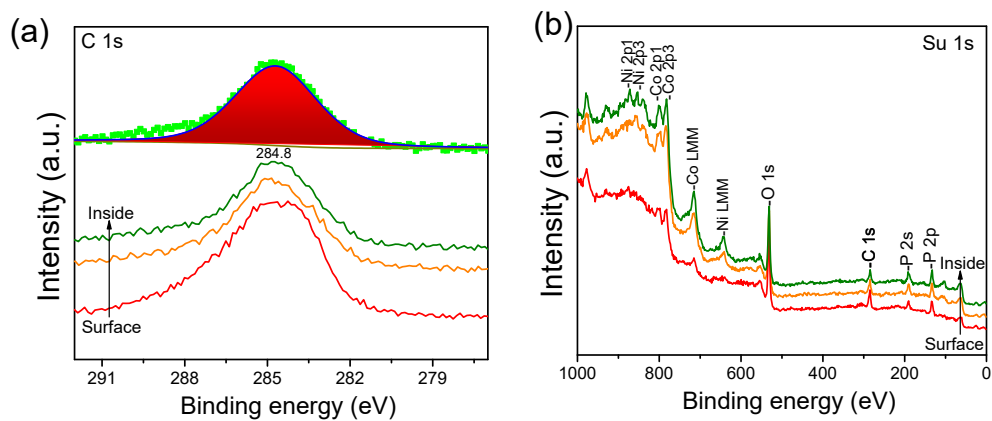

Figure S16. (a) High-resolution spectra of C1s and (b) full spectra from the XPS profile analysis of NiCoP-CoP@NNA.

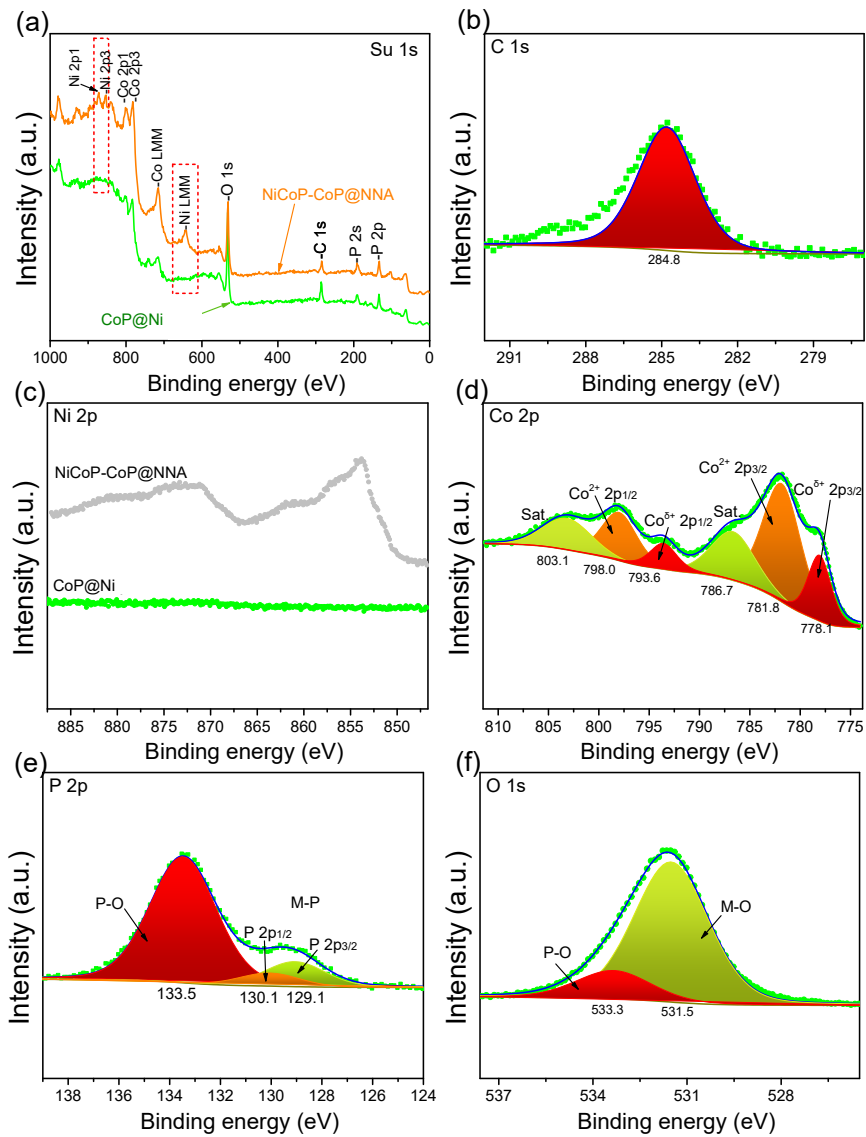

Figure S17. (a) full spectra and (b) high-resolution spectra of C 1s, Ni 2p, Co 2p, P 2p and O 1s of CoP@Ni plate.

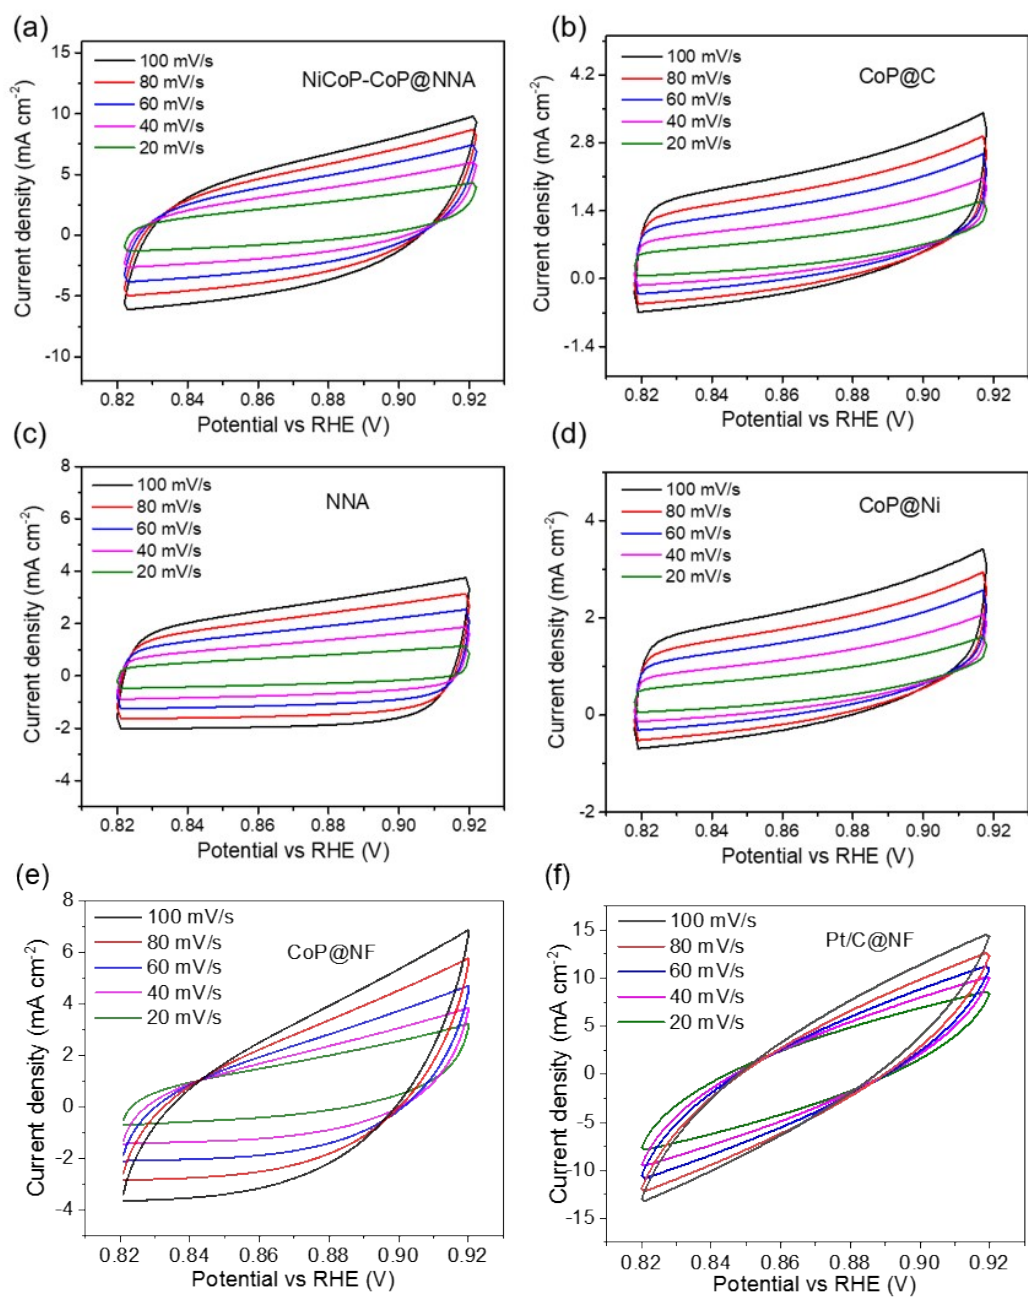

Figure S18. CV curves at different scan rates (20, 40, 60, 80, 100 mV/s) of (a) NiCoP-CoP@NNA, (b) CoP@C, (c) NNA, (d) CoP@Ni plate, (e) CoP@NF, and (f) Pt/C@NF.

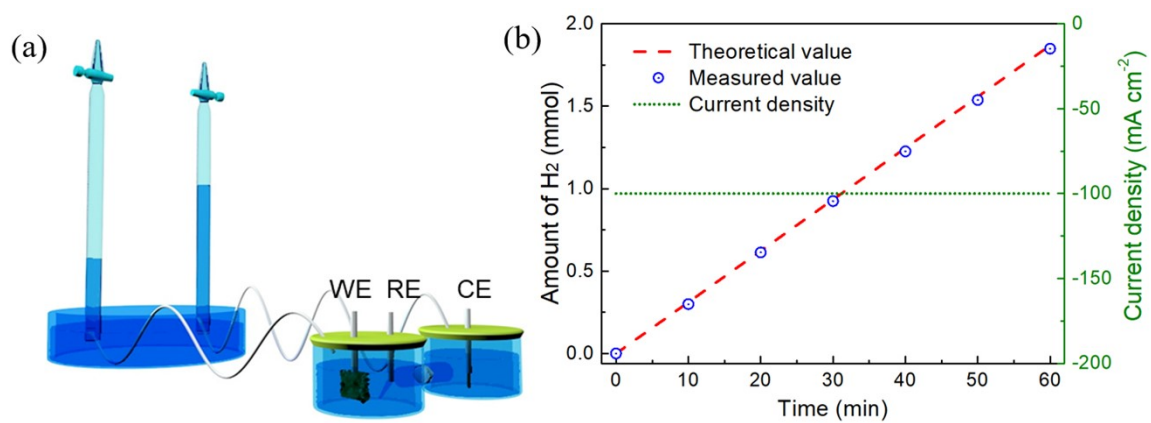

Figure S19. (a) Quantity of H<sub>2</sub> gas evolved as a function of time for NiCoP-CoP@NNA along with the expected amount at an overpotential of 80 mV in 1.0 M KOH. (b) The expected amount is calculated based on Faraday's law.



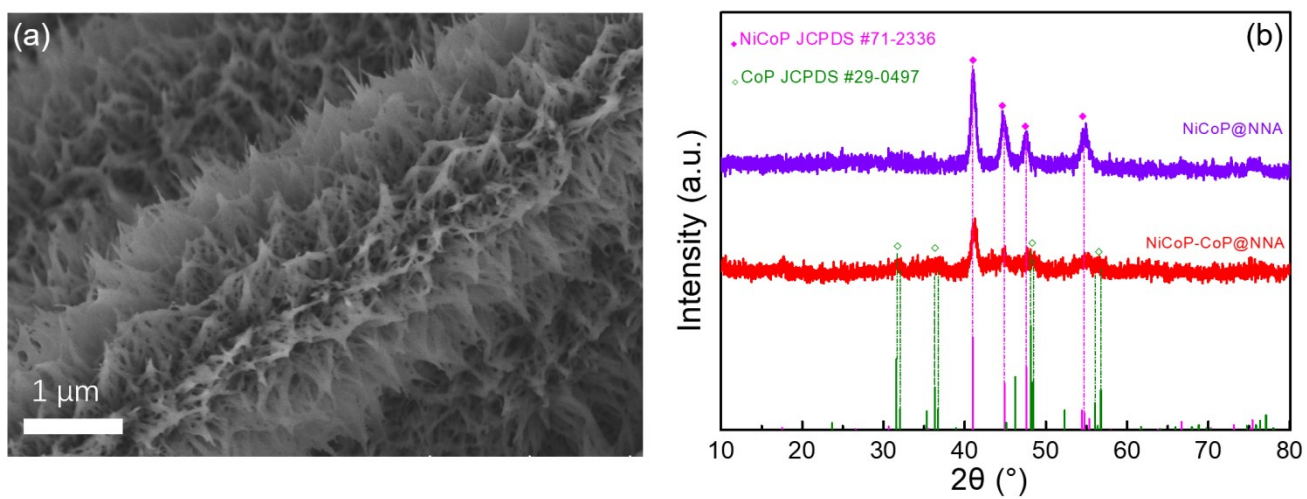

Figure S20. (a) SEM image of NiCoP@NNA. (b) XRD spectra of NiCoP@NNA and NiCoP-CoP@NNA.

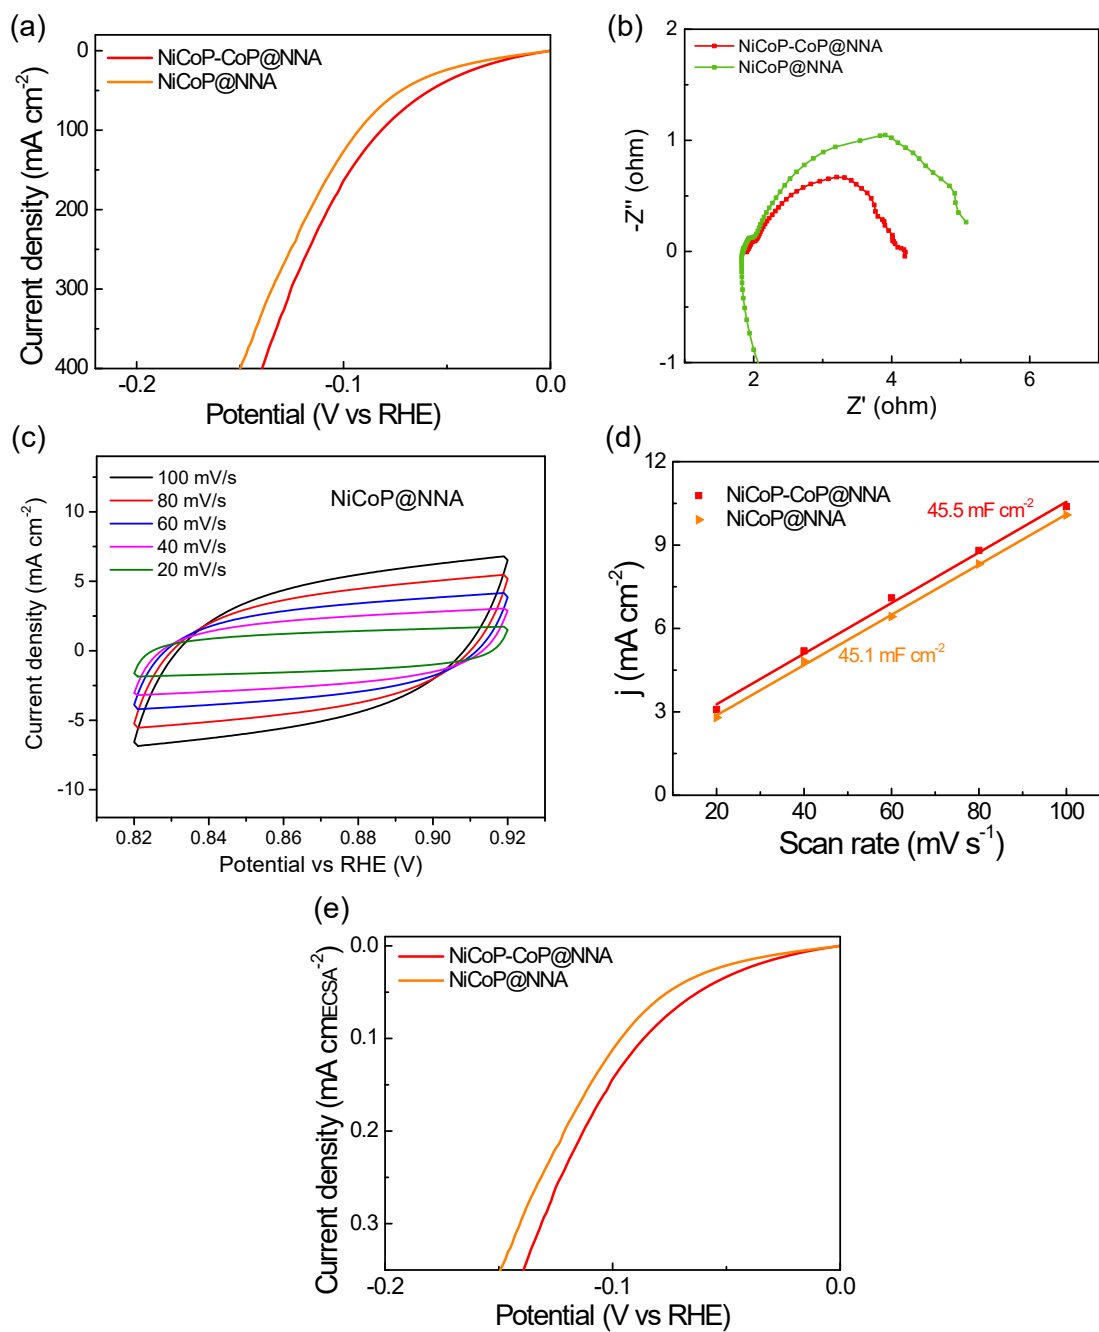

Figure S21. (a) HER polarization curves of NiCoP@NNA and NiCoP-CoP@NNA recorded in 1 M KOH (iR-corrected). The corresponding (b) EIS test at the HER overpotential of 100 mV. (c) Double-layer capacitance test and (d) calculation. (e) ECSA normalized HER polarization curves.

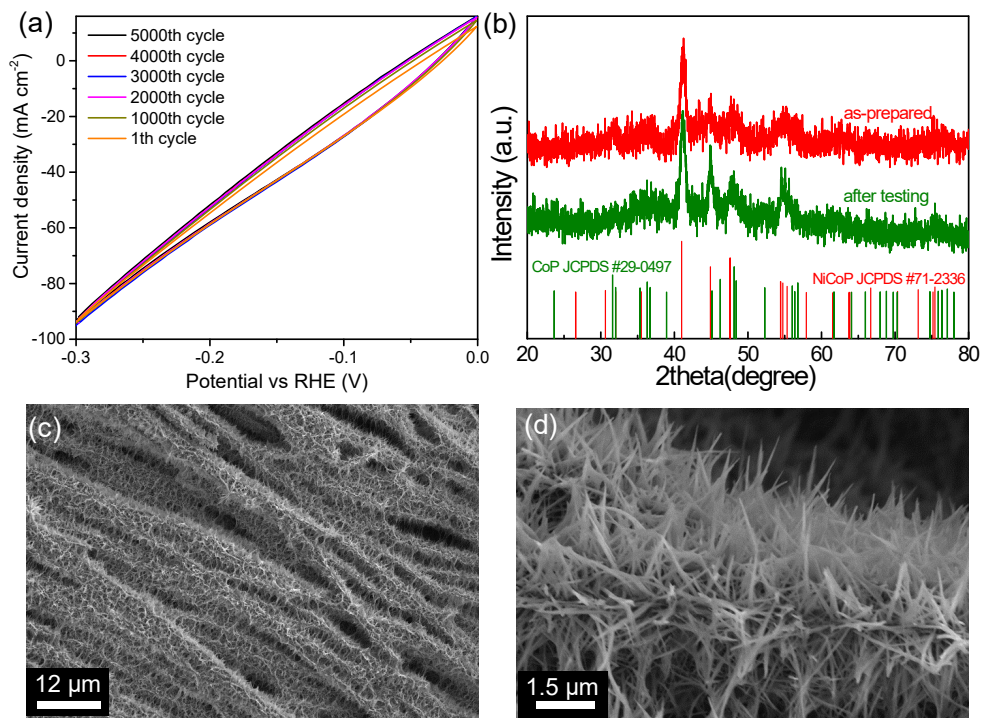

Figure S22. Stability characterization of NiCoP-CoP@NNA after 5000 CV cycles test. (a) CV curves at the scan rate of 100 mV/s, (b) XRD patterns comparisons, (c-d) SEM images after CV tests.

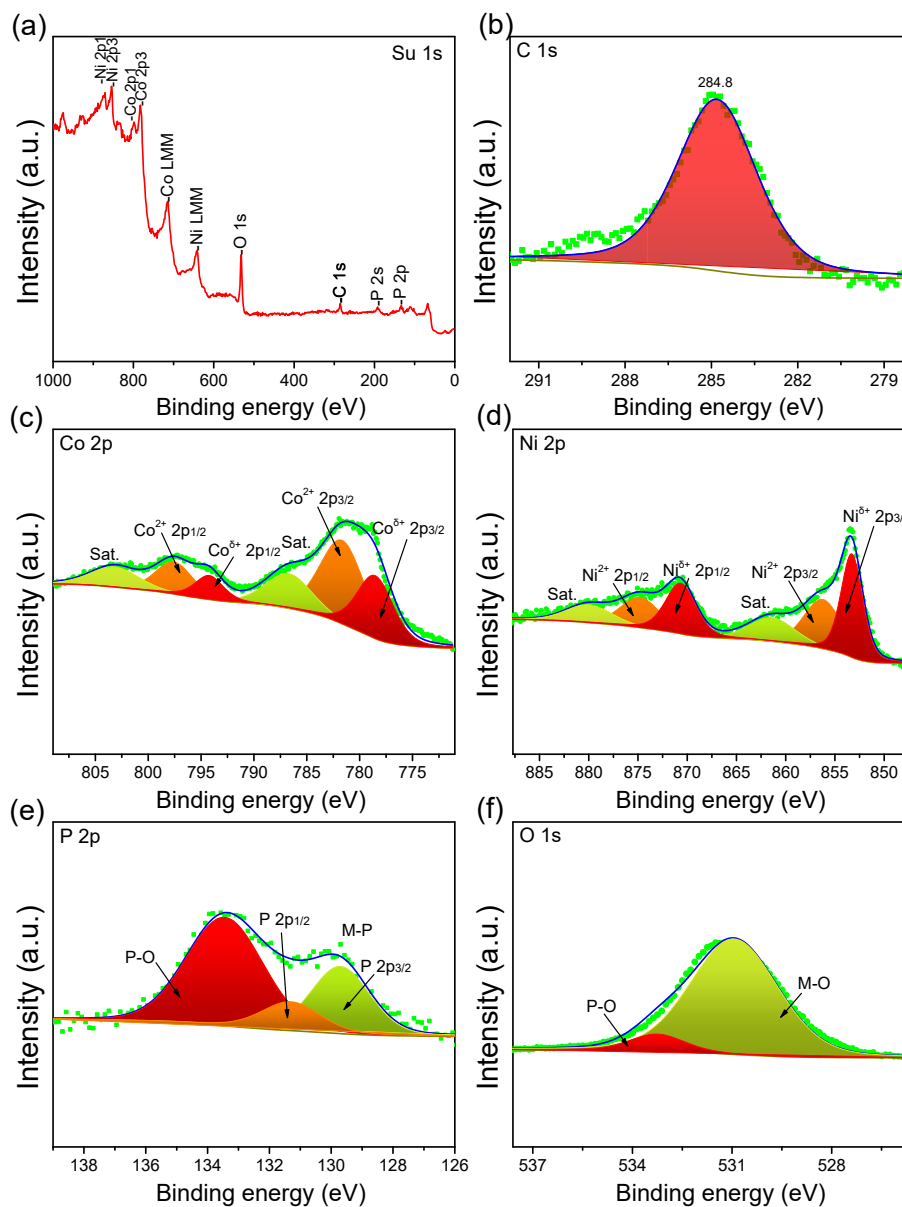

Figure S23. (a) full spectra and (b) high-resolution spectra of C 1s, Ni 2p, Co 2p, P 2p and O 1s of NiCoP-CoP@NNA after 5000 CV cycles test.

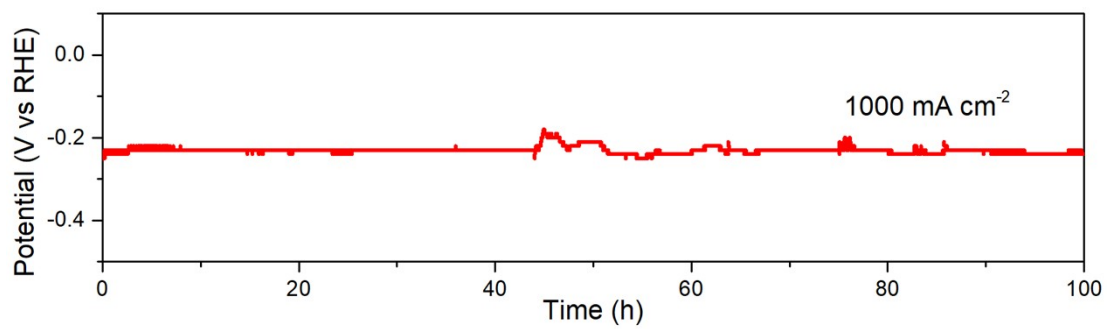

Figure S24. HER chronopotential test of NiCoP-CoP@NNA.

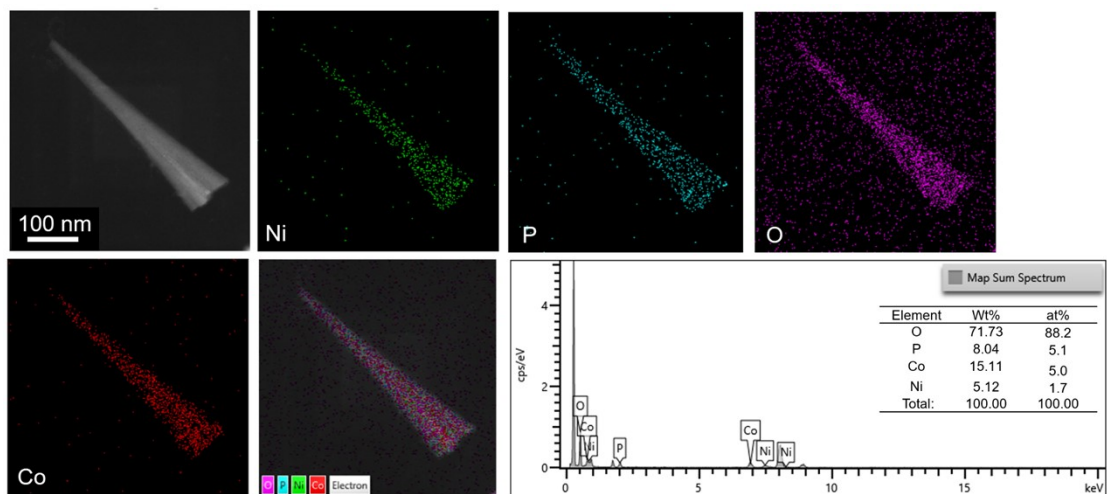

Figure S25. TEM image and corresponding EDS mapping images of NiCoP-CoP nano bristle obtained by 20-min annealing at 300 °C and the corresponding EDS quantitative analysis.

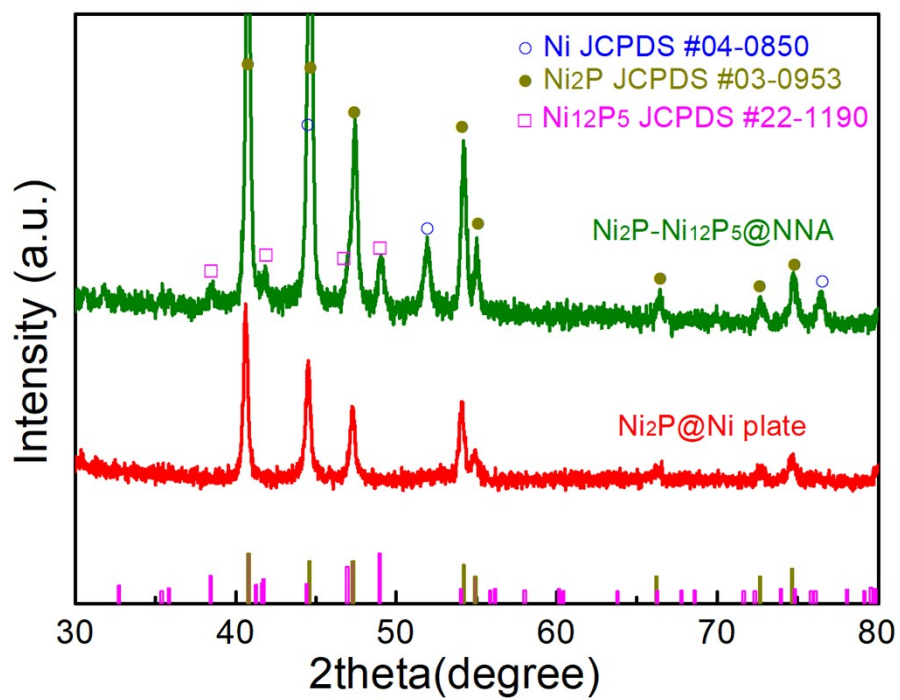

Figure S26. (b) XRD spectra of  $\text{Ni}_2\text{P}@Ni$  plate ( $\text{Ni}_2\text{P}$  was peeled off from the substrate) and  $\text{Ni}_2\text{P}-\text{Ni}_{12}\text{P}_5@NNA$ .

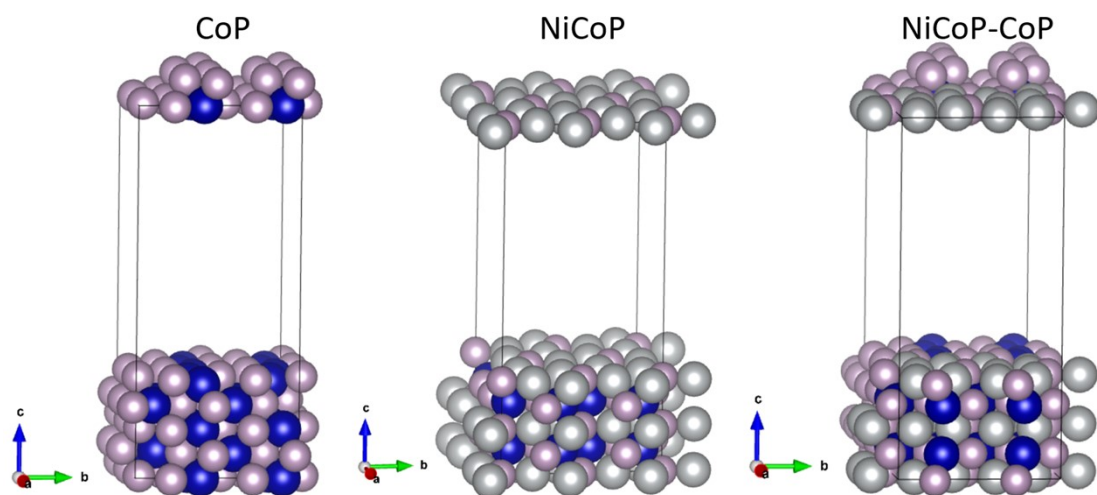

Figure S27. Atomic models of different catalysts used in the DFT calculations of water dissociation and hydrogen adsorption/desorption processes. (Grey: Ni; blue: Co; light pink: P; green: H; red: O).



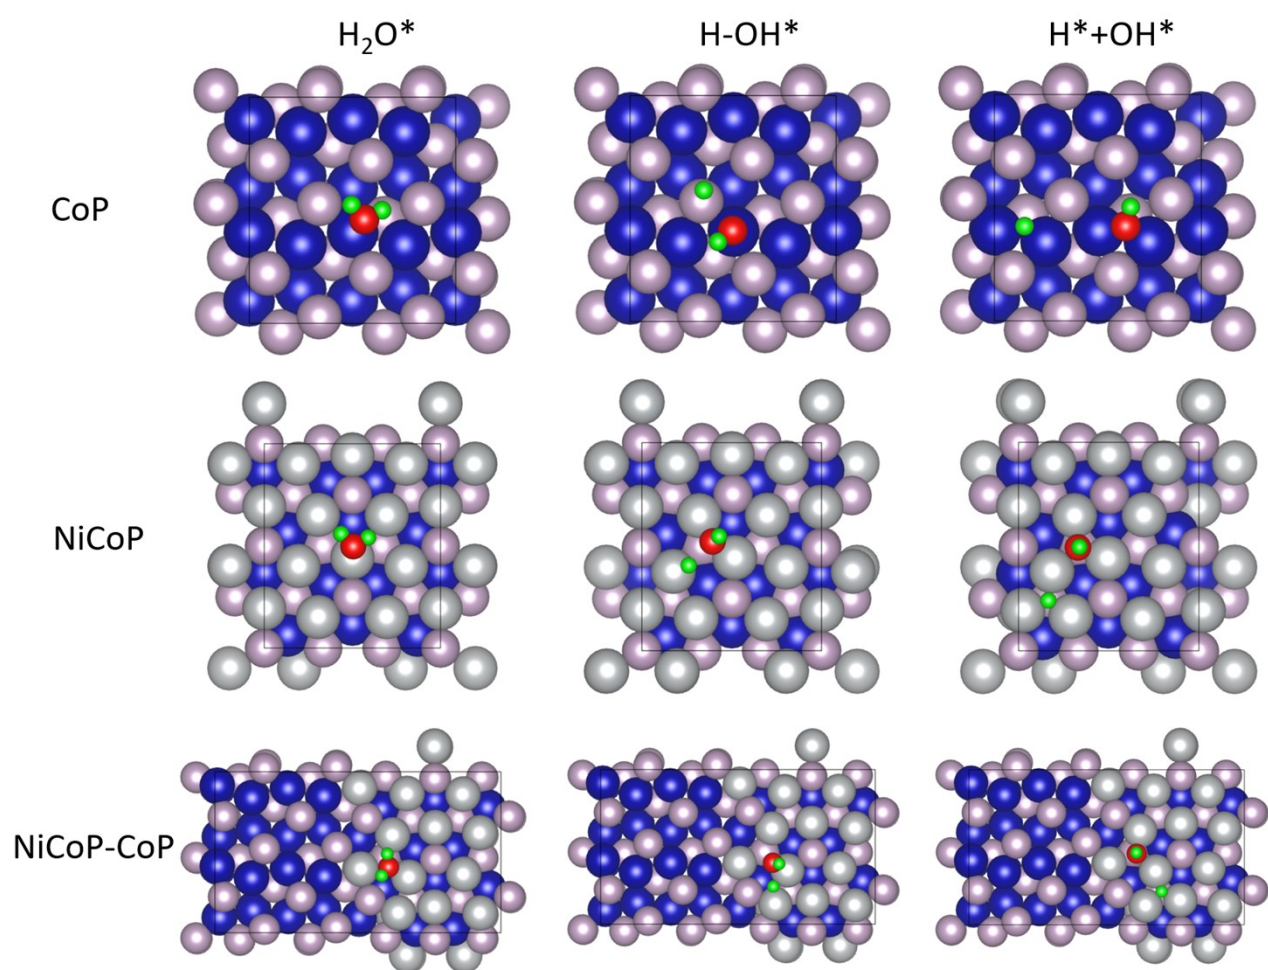

Figure S28. Reaction intermediates adsorption sites on different catalysts in the DFT calculations of water dissociation process. (Grey: Ni; blue: Co; light pink: P; green: H; red: O).

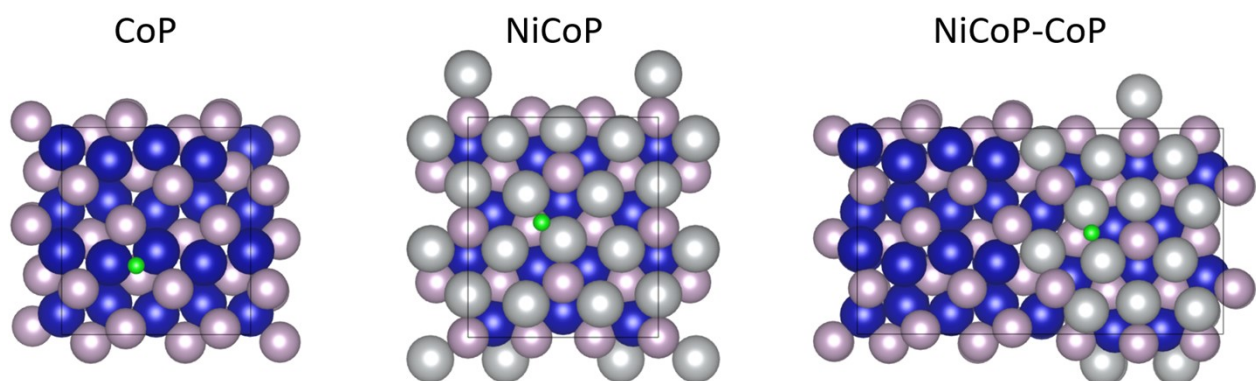

Figure S29. Reaction intermediates adsorption sites on different catalysts in the DFT calculations of hydrogen adsorption/desorption process. (Grey: Ni; blue: Co; light pink: P; green: H; red: O).

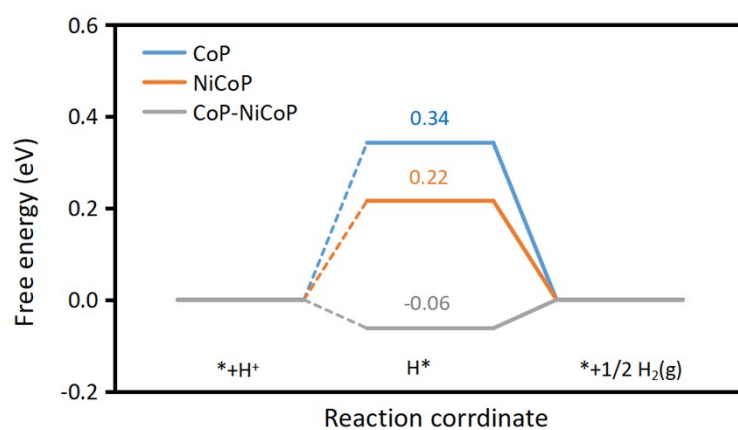

Figure S30. The Gibbs free energy diagrams for hydrogen adsorption/desorption process on CoP, NiCoP, and NiCoP-CoP interface.

**Table S1.** HER and OER electrocatalytic performance comparisons among recently reported advanced bifunctional alkaline water-splitting catalysts.  $\eta_{10}$  and  $\eta_{100}$  correspond to the overpotentials at the geometric current densities of 10, 100, and 200 mA cm<sup>-2</sup>, respectively.

| HER catalysts                                                                        | HER $\eta_{10}$<br>geometric<br>(mV) | HER $\eta_{100}$<br>geometric<br>(mV) | HER Tafel<br>(dec <sup>-1</sup> ) | Electrolyte | Support             | Mass<br>loading<br>(mg cm <sup>-2</sup> ) | Reference                                        |
|--------------------------------------------------------------------------------------|--------------------------------------|---------------------------------------|-----------------------------------|-------------|---------------------|-------------------------------------------|--------------------------------------------------|
| NiCoP-CoP@NNA                                                                        | 20                                   | 80                                    | 28                                | 1 M KOH     | Ni foam             | 37                                        | This work                                        |
| S-CoP                                                                                | 24                                   | 114                                   | 58.4                              | 1 M KOH     | Ti mesh             | 1.8                                       | Nano Energy, 2020, 78, 105347                    |
| C-Co <sub>2</sub> P                                                                  | 30                                   | 65                                    | 36.9                              | 1 M KOH     | glassy carbon       | 2.18                                      | Adv. Funct. Mater. 2021, 31, 2107333.            |
| CePO <sub>4</sub> /MoP/CC                                                            | 48                                   | ~140                                  | 36                                | 1 M KOH     | carbon cloth        | 1.8                                       | Small 2021, 17, 2102413.                         |
| MoO <sub>2</sub> -MoP SE                                                             | 61                                   | ~120                                  | 52.6                              | 1 M KOH     | Mo plate or Mo mesh | NA                                        | J. Mater. Chem. A, 2022, DOI: 10.1039/D1TA10678C |
| Co-P@PC                                                                              | 76                                   | 180                                   | 49                                | 1 M KOH     | Carbon Paper        | 1                                         | Small 2020, 16, 1900550                          |
| CoP/Mo <sub>2</sub> CT <sub>x</sub>                                                  | 78                                   | ~300                                  | 66                                | 1 M KOH     | carbon cloth        | 0.4                                       | J. Mater. Chem. A, 2021, 9, 21259-21269          |
| MoP/MoO <sub>2</sub>                                                                 | 79                                   | ~110                                  | 41                                | 1 M KOH     | Carbon Paper        | 0.5                                       | Chem. Eng. J., 430,2022, 132674                  |
| Ni <sub>12</sub> P <sub>5</sub> -Ni <sub>4</sub> Nb <sub>5</sub> P <sub>4</sub> /PCC | 81                                   | 188                                   | 76.4                              | 1 M KOH     | carbon cloth        | 3.95                                      | Small 2020, 16, 2004843.                         |
| MoP/Mo <sub>2</sub> N                                                                | 89                                   | 190                                   | 78                                | 1 M KOH     | Ni foam             | 5                                         | Angew. Chem. Int. Ed. 2021, 60, 6673             |
| N, B-Ni <sub>2</sub> P/G                                                             | 92                                   | 210                                   | 57.7                              | 1 M KOH     | glassy carbon       | 3                                         | Appl. Catal. B. 278 2020, 119284                 |
| MoP/NPG                                                                              | 126                                  | >210                                  | 56                                | 1 M KOH     | glassy carbon       | 0.28                                      | Appl. Catal. B. 260 2020, 118196                 |
| NiCoP/NPC                                                                            | 128                                  | ~350                                  | 70                                | 1 M KOH     | Ni foam             | 5                                         | Appl. Catal. B. 283 (2021) 119635                |
| Ni <sub>2</sub> P-Fe <sub>2</sub> P                                                  | 128                                  | 225                                   | 86                                | 1 M KOH     | Ni foam             | 15.0                                      | Adv. Funct. Mater. 2021, 31, 2006484.            |
| CoMn-P@NG                                                                            | 160                                  | NA                                    | 110.7                             | 1 M KOH     | glassy carbon       | 2.15                                      | Chem. Commun., 2021, 57, 2400-2403               |

Part of the data shown in the table was measured from the graph in the references and marked by the symbol “~”.

## Appendix

### Water dissociation process

#### CoP H<sub>2</sub>O\*

Title CoP(2\0\0)

Lattice type P

Space group name P 1

Space group number 1

Setting number 1

#### Lattice parameters

| a        | b        | c        | alpha   | beta    | gamma   |
|----------|----------|----------|---------|---------|---------|
| 10.05150 | 11.00530 | 25.00000 | 90.0000 | 90.0000 | 90.0000 |

Unit-cell volume = 2765.494303 Å<sup>3</sup>

#### Structure parameters

|       |      | x       | y       | z       | Occ.  | U     | Site | Sym. |
|-------|------|---------|---------|---------|-------|-------|------|------|
| 1 Co  | Co1  | 0.24946 | 0.34874 | 0.00000 | 1.000 | 1.000 | 1a   | 1    |
| 2 Co  | Co2  | 0.24946 | 0.84874 | 0.00000 | 1.000 | 1.000 | 1a   | 1    |
| 3 Co  | Co3  | 0.49946 | 0.40126 | 0.00000 | 1.000 | 1.000 | 1a   | 1    |
| 4 Co  | Co4  | 0.49946 | 0.90126 | 0.00000 | 1.000 | 1.000 | 1a   | 1    |
| 5 Co  | Co5  | 0.74946 | 0.34874 | 0.00000 | 1.000 | 1.000 | 1a   | 1    |
| 6 Co  | Co6  | 0.74946 | 0.84874 | 0.00000 | 1.000 | 1.000 | 1a   | 1    |
| 7 Co  | Co7  | 0.99946 | 0.40126 | 0.00000 | 1.000 | 1.000 | 1a   | 1    |
| 8 Co  | Co8  | 0.99946 | 0.90126 | 0.00000 | 1.000 | 1.000 | 1a   | 1    |
| 9 Co  | Co9  | 0.00054 | 0.09874 | 0.06562 | 1.000 | 1.000 | 1a   | 1    |
| 10 Co | Co10 | 0.00054 | 0.59874 | 0.06562 | 1.000 | 1.000 | 1a   | 1    |
| 11 Co | Co11 | 0.25054 | 0.15126 | 0.06562 | 1.000 | 1.000 | 1a   | 1    |
| 12 Co | Co12 | 0.25054 | 0.65126 | 0.06562 | 1.000 | 1.000 | 1a   | 1    |
| 13 Co | Co13 | 0.50054 | 0.09874 | 0.06562 | 1.000 | 1.000 | 1a   | 1    |
| 14 Co | Co14 | 0.50054 | 0.59874 | 0.06562 | 1.000 | 1.000 | 1a   | 1    |
| 15 Co | Co15 | 0.75054 | 0.15126 | 0.06562 | 1.000 | 1.000 | 1a   | 1    |
| 16 Co | Co16 | 0.75054 | 0.65126 | 0.06562 | 1.000 | 1.000 | 1a   | 1    |
| 17 Co | Co17 | 0.24946 | 0.34874 | 0.13125 | 1.000 | 1.000 | 1a   | 1    |
| 18 Co | Co18 | 0.24946 | 0.84874 | 0.13125 | 1.000 | 1.000 | 1a   | 1    |
| 19 Co | Co19 | 0.49946 | 0.40126 | 0.13125 | 1.000 | 1.000 | 1a   | 1    |
| 20 Co | Co20 | 0.49946 | 0.90126 | 0.13125 | 1.000 | 1.000 | 1a   | 1    |

|       |      |         |         |         |       |       |    |   |
|-------|------|---------|---------|---------|-------|-------|----|---|
| 21 Co | Co21 | 0.74946 | 0.34874 | 0.13125 | 1.000 | 1.000 | 1a | 1 |
| 22 Co | Co22 | 0.74946 | 0.84874 | 0.13125 | 1.000 | 1.000 | 1a | 1 |
| 23 Co | Co23 | 0.99946 | 0.40126 | 0.13125 | 1.000 | 1.000 | 1a | 1 |
| 24 Co | Co24 | 0.99946 | 0.90126 | 0.13125 | 1.000 | 1.000 | 1a | 1 |
| 25 Co | Co25 | 0.99782 | 0.10244 | 0.19589 | 1.000 | 1.000 | 1a | 1 |
| 26 Co | Co26 | 0.99782 | 0.60244 | 0.19589 | 1.000 | 1.000 | 1a | 1 |
| 27 Co | Co27 | 0.24781 | 0.14756 | 0.19589 | 1.000 | 1.000 | 1a | 1 |
| 28 Co | Co28 | 0.24781 | 0.64756 | 0.19589 | 1.000 | 1.000 | 1a | 1 |
| 29 Co | Co29 | 0.49782 | 0.10244 | 0.19589 | 1.000 | 1.000 | 1a | 1 |
| 30 Co | Co30 | 0.49782 | 0.60244 | 0.19589 | 1.000 | 1.000 | 1a | 1 |
| 31 Co | Co31 | 0.74782 | 0.14756 | 0.19589 | 1.000 | 1.000 | 1a | 1 |
| 32 Co | Co32 | 0.74782 | 0.64756 | 0.19589 | 1.000 | 1.000 | 1a | 1 |
| 33 Co | Co33 | 0.25209 | 0.34756 | 0.25116 | 1.000 | 1.000 | 1a | 1 |
| 34 Co | Co34 | 0.25209 | 0.84756 | 0.25116 | 1.000 | 1.000 | 1a | 1 |
| 35 Co | Co35 | 0.50209 | 0.40244 | 0.25116 | 1.000 | 1.000 | 1a | 1 |
| 36 Co | Co36 | 0.50209 | 0.90244 | 0.25116 | 1.000 | 1.000 | 1a | 1 |
| 37 Co | Co37 | 0.75209 | 0.34756 | 0.25116 | 1.000 | 1.000 | 1a | 1 |
| 38 Co | Co38 | 0.75209 | 0.84756 | 0.25116 | 1.000 | 1.000 | 1a | 1 |
| 39 Co | Co39 | 0.00209 | 0.40244 | 0.25116 | 1.000 | 1.000 | 1a | 1 |
| 40 Co | Co40 | 0.00209 | 0.90244 | 0.25116 | 1.000 | 1.000 | 1a | 1 |
| 41 P  | P1   | 0.09583 | 0.20919 | 0.00000 | 1.000 | 1.000 | 1a | 1 |
| 42 P  | P2   | 0.09583 | 0.70919 | 0.00000 | 1.000 | 1.000 | 1a | 1 |
| 43 P  | P3   | 0.34583 | 0.04081 | 0.00000 | 1.000 | 1.000 | 1a | 1 |
| 44 P  | P4   | 0.34583 | 0.54081 | 0.00000 | 1.000 | 1.000 | 1a | 1 |
| 45 P  | P5   | 0.59583 | 0.20919 | 0.00000 | 1.000 | 1.000 | 1a | 1 |
| 46 P  | P6   | 0.59583 | 0.70919 | 0.00000 | 1.000 | 1.000 | 1a | 1 |
| 47 P  | P7   | 0.84583 | 0.04081 | 0.00000 | 1.000 | 1.000 | 1a | 1 |
| 48 P  | P8   | 0.84583 | 0.54081 | 0.00000 | 1.000 | 1.000 | 1a | 1 |
| 49 P  | P9   | 0.15417 | 0.45919 | 0.06562 | 1.000 | 1.000 | 1a | 1 |
| 50 P  | P10  | 0.15417 | 0.95919 | 0.06562 | 1.000 | 1.000 | 1a | 1 |
| 51 P  | P11  | 0.40417 | 0.29081 | 0.06562 | 1.000 | 1.000 | 1a | 1 |
| 52 P  | P12  | 0.40417 | 0.79081 | 0.06562 | 1.000 | 1.000 | 1a | 1 |
| 53 P  | P13  | 0.65417 | 0.45919 | 0.06562 | 1.000 | 1.000 | 1a | 1 |
| 54 P  | P14  | 0.65417 | 0.95919 | 0.06562 | 1.000 | 1.000 | 1a | 1 |
| 55 P  | P15  | 0.90417 | 0.29081 | 0.06562 | 1.000 | 1.000 | 1a | 1 |
| 56 P  | P16  | 0.90417 | 0.79081 | 0.06562 | 1.000 | 1.000 | 1a | 1 |
| 57 P  | P17  | 0.09583 | 0.20919 | 0.13125 | 1.000 | 1.000 | 1a | 1 |
| 58 P  | P18  | 0.09583 | 0.70919 | 0.13125 | 1.000 | 1.000 | 1a | 1 |
| 59 P  | P19  | 0.34583 | 0.04081 | 0.13125 | 1.000 | 1.000 | 1a | 1 |
| 60 P  | P20  | 0.34583 | 0.54081 | 0.13125 | 1.000 | 1.000 | 1a | 1 |
| 61 P  | P21  | 0.59583 | 0.20919 | 0.13125 | 1.000 | 1.000 | 1a | 1 |
| 62 P  | P22  | 0.59583 | 0.70919 | 0.13125 | 1.000 | 1.000 | 1a | 1 |
| 63 P  | P23  | 0.84583 | 0.04081 | 0.13125 | 1.000 | 1.000 | 1a | 1 |
| 64 P  | P24  | 0.84583 | 0.54081 | 0.13125 | 1.000 | 1.000 | 1a | 1 |

|      |     |         |         |         |       |       |    |   |
|------|-----|---------|---------|---------|-------|-------|----|---|
| 65 P | P25 | 0.15513 | 0.46395 | 0.19702 | 1.000 | 1.000 | 1a | 1 |
| 66 P | P26 | 0.15513 | 0.96395 | 0.19702 | 1.000 | 1.000 | 1a | 1 |
| 67 P | P27 | 0.40513 | 0.28605 | 0.19702 | 1.000 | 1.000 | 1a | 1 |
| 68 P | P28 | 0.40513 | 0.78605 | 0.19702 | 1.000 | 1.000 | 1a | 1 |
| 69 P | P29 | 0.65513 | 0.46395 | 0.19702 | 1.000 | 1.000 | 1a | 1 |
| 70 P | P30 | 0.65513 | 0.96395 | 0.19702 | 1.000 | 1.000 | 1a | 1 |
| 71 P | P31 | 0.90513 | 0.28605 | 0.19702 | 1.000 | 1.000 | 1a | 1 |
| 72 P | P32 | 0.90513 | 0.78605 | 0.19702 | 1.000 | 1.000 | 1a | 1 |
| 73 P | P33 | 0.08905 | 0.22099 | 0.26578 | 1.000 | 1.000 | 1a | 1 |
| 74 P | P34 | 0.08905 | 0.72099 | 0.26578 | 1.000 | 1.000 | 1a | 1 |
| 75 P | P35 | 0.33904 | 0.02901 | 0.26578 | 1.000 | 1.000 | 1a | 1 |
| 76 P | P36 | 0.33904 | 0.52901 | 0.26578 | 1.000 | 1.000 | 1a | 1 |
| 77 P | P37 | 0.58904 | 0.22099 | 0.26578 | 1.000 | 1.000 | 1a | 1 |
| 78 P | P38 | 0.58904 | 0.72099 | 0.26578 | 1.000 | 1.000 | 1a | 1 |
| 79 P | P39 | 0.83904 | 0.02901 | 0.26578 | 1.000 | 1.000 | 1a | 1 |
| 80 P | P40 | 0.83904 | 0.52901 | 0.26578 | 1.000 | 1.000 | 1a | 1 |
| 81 O | O1  | 0.55677 | 0.45939 | 0.34259 | 1.000 | 1.000 | 1a | 1 |
| 82 H | H1  | 0.64284 | 0.50024 | 0.33790 | 1.000 | 1.000 | 1a | 1 |
| 83 H | H2  | 0.49502 | 0.52433 | 0.35275 | 1.000 | 1.000 | 1a | 1 |

=====  
 ===

### NiCoP-CoP H<sub>2</sub>O\*

=====  
 ===

Title                   opt-Test

Lattice type            P

Space group name      P 1

Space group number    1

Setting number         1

Lattice parameters

| a        | b        | c        | alpha   | beta    | gamma   |
|----------|----------|----------|---------|---------|---------|
| 20.00560 | 11.24700 | 25.00000 | 90.0000 | 90.0000 | 90.0000 |

Unit-cell volume = 5625.074443 Å<sup>3</sup>

Structure parameters

| x | y | z | Occ. | U | Site | Sym. |
|---|---|---|------|---|------|------|
|---|---|---|------|---|------|------|

|       |      |         |         |         |       |       |    |   |
|-------|------|---------|---------|---------|-------|-------|----|---|
| 1 Co  | Co1  | 0.00675 | 0.40905 | 0.00000 | 1.000 | 1.000 | 1a | 1 |
| 2 Co  | Co2  | 0.00675 | 0.90905 | 0.00000 | 1.000 | 1.000 | 1a | 1 |
| 3 Co  | Co3  | 0.12814 | 0.34862 | 0.00000 | 1.000 | 1.000 | 1a | 1 |
| 4 Co  | Co4  | 0.12814 | 0.84862 | 0.00000 | 1.000 | 1.000 | 1a | 1 |
| 5 Co  | Co5  | 0.25523 | 0.39733 | 0.00000 | 1.000 | 1.000 | 1a | 1 |
| 6 Co  | Co6  | 0.25523 | 0.89733 | 0.00000 | 1.000 | 1.000 | 1a | 1 |
| 7 Co  | Co7  | 0.38277 | 0.35161 | 0.00000 | 1.000 | 1.000 | 1a | 1 |
| 8 Co  | Co8  | 0.38277 | 0.85161 | 0.00000 | 1.000 | 1.000 | 1a | 1 |
| 9 Co  | Co9  | 0.01686 | 0.09208 | 0.06562 | 1.000 | 1.000 | 1a | 1 |
| 10 Co | Co10 | 0.01686 | 0.59208 | 0.06562 | 1.000 | 1.000 | 1a | 1 |
| 11 Co | Co11 | 0.13517 | 0.14703 | 0.06562 | 1.000 | 1.000 | 1a | 1 |
| 12 Co | Co12 | 0.13517 | 0.64703 | 0.06562 | 1.000 | 1.000 | 1a | 1 |
| 13 Co | Co13 | 0.25705 | 0.10125 | 0.06562 | 1.000 | 1.000 | 1a | 1 |
| 14 Co | Co14 | 0.25705 | 0.60125 | 0.06562 | 1.000 | 1.000 | 1a | 1 |
| 15 Co | Co15 | 0.37959 | 0.14467 | 0.06562 | 1.000 | 1.000 | 1a | 1 |
| 16 Co | Co16 | 0.37959 | 0.64467 | 0.06562 | 1.000 | 1.000 | 1a | 1 |
| 17 Co | Co17 | 0.50387 | 0.08464 | 0.06562 | 1.000 | 1.000 | 1a | 1 |
| 18 Co | Co18 | 0.50387 | 0.58464 | 0.06562 | 1.000 | 1.000 | 1a | 1 |
| 19 Co | Co19 | 0.58720 | 0.27888 | 0.06562 | 1.000 | 1.000 | 1a | 1 |
| 20 Co | Co20 | 0.58720 | 0.77888 | 0.06562 | 1.000 | 1.000 | 1a | 1 |
| 21 Co | Co21 | 0.70394 | 0.02381 | 0.06562 | 1.000 | 1.000 | 1a | 1 |
| 22 Co | Co22 | 0.70394 | 0.52381 | 0.06562 | 1.000 | 1.000 | 1a | 1 |
| 23 Co | Co23 | 0.77258 | 0.32820 | 0.06562 | 1.000 | 1.000 | 1a | 1 |
| 24 Co | Co24 | 0.77258 | 0.82820 | 0.06562 | 1.000 | 1.000 | 1a | 1 |
| 25 Co | Co25 | 0.83653 | 0.02678 | 0.06562 | 1.000 | 1.000 | 1a | 1 |
| 26 Co | Co26 | 0.83653 | 0.52678 | 0.06562 | 1.000 | 1.000 | 1a | 1 |
| 27 Co | Co27 | 0.95638 | 0.27536 | 0.06562 | 1.000 | 1.000 | 1a | 1 |
| 28 Co | Co28 | 0.95638 | 0.77536 | 0.06562 | 1.000 | 1.000 | 1a | 1 |
| 29 Co | Co29 | 0.01381 | 0.40341 | 0.13125 | 1.000 | 1.000 | 1a | 1 |
| 30 Co | Co30 | 0.01381 | 0.90341 | 0.13125 | 1.000 | 1.000 | 1a | 1 |
| 31 Co | Co31 | 0.13239 | 0.34729 | 0.13125 | 1.000 | 1.000 | 1a | 1 |
| 32 Co | Co32 | 0.13239 | 0.84729 | 0.13125 | 1.000 | 1.000 | 1a | 1 |
| 33 Co | Co33 | 0.25310 | 0.39909 | 0.13125 | 1.000 | 1.000 | 1a | 1 |
| 34 Co | Co34 | 0.25310 | 0.89909 | 0.13125 | 1.000 | 1.000 | 1a | 1 |
| 35 Co | Co35 | 0.37623 | 0.35070 | 0.13125 | 1.000 | 1.000 | 1a | 1 |
| 36 Co | Co36 | 0.37623 | 0.85070 | 0.13125 | 1.000 | 1.000 | 1a | 1 |
| 37 Co | Co37 | 0.01475 | 0.09492 | 0.19657 | 1.000 | 1.000 | 1a | 1 |
| 38 Co | Co38 | 0.01514 | 0.59573 | 0.19689 | 1.000 | 1.000 | 1a | 1 |
| 39 Co | Co39 | 0.13303 | 0.14032 | 0.19691 | 1.000 | 1.000 | 1a | 1 |
| 40 Co | Co40 | 0.13328 | 0.64000 | 0.19688 | 1.000 | 1.000 | 1a | 1 |
| 41 Co | Co41 | 0.25541 | 0.10321 | 0.19853 | 1.000 | 1.000 | 1a | 1 |
| 42 Co | Co42 | 0.25551 | 0.60234 | 0.19849 | 1.000 | 1.000 | 1a | 1 |
| 43 Co | Co43 | 0.37816 | 0.14697 | 0.19770 | 1.000 | 1.000 | 1a | 1 |
| 44 Co | Co44 | 0.37791 | 0.64497 | 0.19815 | 1.000 | 1.000 | 1a | 1 |



|       |      |         |         |         |       |       |    |   |
|-------|------|---------|---------|---------|-------|-------|----|---|
| 45 Co | Co45 | 0.50360 | 0.09406 | 0.20043 | 1.000 | 1.000 | 1a | 1 |
| 46 Co | Co46 | 0.50329 | 0.59198 | 0.20045 | 1.000 | 1.000 | 1a | 1 |
| 47 Co | Co47 | 0.58639 | 0.27477 | 0.19938 | 1.000 | 1.000 | 1a | 1 |
| 48 Co | Co48 | 0.58456 | 0.77349 | 0.20161 | 1.000 | 1.000 | 1a | 1 |
| 49 Co | Co49 | 0.70305 | 0.02152 | 0.19767 | 1.000 | 1.000 | 1a | 1 |
| 50 Co | Co50 | 0.70158 | 0.51720 | 0.20063 | 1.000 | 1.000 | 1a | 1 |
| 51 Co | Co51 | 0.77140 | 0.32938 | 0.19819 | 1.000 | 1.000 | 1a | 1 |
| 52 Co | Co52 | 0.76994 | 0.82815 | 0.19855 | 1.000 | 1.000 | 1a | 1 |
| 53 Co | Co53 | 0.83266 | 0.02809 | 0.20171 | 1.000 | 1.000 | 1a | 1 |
| 54 Co | Co54 | 0.83365 | 0.52648 | 0.19967 | 1.000 | 1.000 | 1a | 1 |
| 55 Co | Co55 | 0.95566 | 0.28059 | 0.19777 | 1.000 | 1.000 | 1a | 1 |
| 56 Co | Co56 | 0.95475 | 0.78094 | 0.19808 | 1.000 | 1.000 | 1a | 1 |
| 57 Co | Co57 | 0.00803 | 0.41578 | 0.26113 | 1.000 | 1.000 | 1a | 1 |
| 58 Co | Co58 | 0.00803 | 0.91652 | 0.26109 | 1.000 | 1.000 | 1a | 1 |
| 59 Co | Co59 | 0.12767 | 0.33996 | 0.25408 | 1.000 | 1.000 | 1a | 1 |
| 60 Co | Co60 | 0.12767 | 0.83971 | 0.25370 | 1.000 | 1.000 | 1a | 1 |
| 61 Co | Co61 | 0.25511 | 0.39846 | 0.25073 | 1.000 | 1.000 | 1a | 1 |
| 62 Co | Co62 | 0.25484 | 0.89846 | 0.25025 | 1.000 | 1.000 | 1a | 1 |
| 63 Co | Co63 | 0.38222 | 0.35132 | 0.25385 | 1.000 | 1.000 | 1a | 1 |
| 64 Co | Co64 | 0.38080 | 0.85125 | 0.25338 | 1.000 | 1.000 | 1a | 1 |
| 65 Ni | Ni1  | 0.51052 | 0.40283 | 0.00000 | 1.000 | 1.000 | 1a | 1 |
| 66 Ni | Ni2  | 0.51052 | 0.90283 | 0.00000 | 1.000 | 1.000 | 1a | 1 |
| 67 Ni | Ni3  | 0.62146 | 0.10806 | 0.00000 | 1.000 | 1.000 | 1a | 1 |
| 68 Ni | Ni4  | 0.62146 | 0.60806 | 0.00000 | 1.000 | 1.000 | 1a | 1 |
| 69 Ni | Ni5  | 0.67694 | 0.35784 | 0.00000 | 1.000 | 1.000 | 1a | 1 |
| 70 Ni | Ni6  | 0.67694 | 0.85784 | 0.00000 | 1.000 | 1.000 | 1a | 1 |
| 71 Ni | Ni7  | 0.76923 | 0.15455 | 0.00000 | 1.000 | 1.000 | 1a | 1 |
| 72 Ni | Ni8  | 0.76923 | 0.65455 | 0.00000 | 1.000 | 1.000 | 1a | 1 |
| 73 Ni | Ni9  | 0.86953 | 0.35916 | 0.00000 | 1.000 | 1.000 | 1a | 1 |
| 74 Ni | Ni10 | 0.86953 | 0.85916 | 0.00000 | 1.000 | 1.000 | 1a | 1 |
| 75 Ni | Ni11 | 0.93046 | 0.11273 | 0.00000 | 1.000 | 1.000 | 1a | 1 |
| 76 Ni | Ni12 | 0.93046 | 0.61273 | 0.00000 | 1.000 | 1.000 | 1a | 1 |
| 77 Ni | Ni13 | 0.50670 | 0.39909 | 0.13125 | 1.000 | 1.000 | 1a | 1 |
| 78 Ni | Ni14 | 0.50670 | 0.89909 | 0.13125 | 1.000 | 1.000 | 1a | 1 |
| 79 Ni | Ni15 | 0.62370 | 0.10922 | 0.13125 | 1.000 | 1.000 | 1a | 1 |
| 80 Ni | Ni16 | 0.62370 | 0.60922 | 0.13125 | 1.000 | 1.000 | 1a | 1 |
| 81 Ni | Ni17 | 0.67014 | 0.36192 | 0.13125 | 1.000 | 1.000 | 1a | 1 |
| 82 Ni | Ni18 | 0.67014 | 0.86192 | 0.13125 | 1.000 | 1.000 | 1a | 1 |
| 83 Ni | Ni19 | 0.77115 | 0.15432 | 0.13125 | 1.000 | 1.000 | 1a | 1 |
| 84 Ni | Ni20 | 0.77115 | 0.65432 | 0.13125 | 1.000 | 1.000 | 1a | 1 |
| 85 Ni | Ni21 | 0.87340 | 0.36151 | 0.13125 | 1.000 | 1.000 | 1a | 1 |
| 86 Ni | Ni22 | 0.87340 | 0.86151 | 0.13125 | 1.000 | 1.000 | 1a | 1 |
| 87 Ni | Ni23 | 0.91952 | 0.11549 | 0.13125 | 1.000 | 1.000 | 1a | 1 |
| 88 Ni | Ni24 | 0.91952 | 0.61549 | 0.13125 | 1.000 | 1.000 | 1a | 1 |

|        |      |         |         |         |       |       |    |   |
|--------|------|---------|---------|---------|-------|-------|----|---|
| 89 Ni  | Ni25 | 0.51086 | 0.39603 | 0.25653 | 1.000 | 1.000 | 1a | 1 |
| 90 Ni  | Ni26 | 0.50571 | 0.89958 | 0.25211 | 1.000 | 1.000 | 1a | 1 |
| 91 Ni  | Ni27 | 0.64159 | 0.12360 | 0.27156 | 1.000 | 1.000 | 1a | 1 |
| 92 Ni  | Ni28 | 0.62123 | 0.60790 | 0.26657 | 1.000 | 1.000 | 1a | 1 |
| 93 Ni  | Ni29 | 0.67856 | 0.34496 | 0.27012 | 1.000 | 1.000 | 1a | 1 |
| 94 Ni  | Ni30 | 0.67183 | 0.86517 | 0.26239 | 1.000 | 1.000 | 1a | 1 |
| 95 Ni  | Ni31 | 0.76767 | 0.15972 | 0.26635 | 1.000 | 1.000 | 1a | 1 |
| 96 Ni  | Ni32 | 0.77026 | 0.65417 | 0.26302 | 1.000 | 1.000 | 1a | 1 |
| 97 Ni  | Ni33 | 0.87002 | 0.36418 | 0.26202 | 1.000 | 1.000 | 1a | 1 |
| 98 Ni  | Ni34 | 0.86742 | 0.86145 | 0.26264 | 1.000 | 1.000 | 1a | 1 |
| 99 Ni  | Ni35 | 0.92732 | 0.12267 | 0.26347 | 1.000 | 1.000 | 1a | 1 |
| 100 Ni | Ni36 | 0.92636 | 0.62161 | 0.26323 | 1.000 | 1.000 | 1a | 1 |
| 101 P  | P1   | 0.03409 | 0.21848 | 0.00000 | 1.000 | 1.000 | 1a | 1 |
| 102 P  | P2   | 0.03409 | 0.71848 | 0.00000 | 1.000 | 1.000 | 1a | 1 |
| 103 P  | P3   | 0.17390 | 0.02890 | 0.00000 | 1.000 | 1.000 | 1a | 1 |
| 104 P  | P4   | 0.17390 | 0.52890 | 0.00000 | 1.000 | 1.000 | 1a | 1 |
| 105 P  | P5   | 0.29813 | 0.21916 | 0.00000 | 1.000 | 1.000 | 1a | 1 |
| 106 P  | P6   | 0.29813 | 0.71916 | 0.00000 | 1.000 | 1.000 | 1a | 1 |
| 107 P  | P7   | 0.42362 | 0.03145 | 0.00000 | 1.000 | 1.000 | 1a | 1 |
| 108 P  | P8   | 0.42362 | 0.53145 | 0.00000 | 1.000 | 1.000 | 1a | 1 |
| 109 P  | P9   | 0.52912 | 0.20886 | 0.00000 | 1.000 | 1.000 | 1a | 1 |
| 110 P  | P10  | 0.52912 | 0.70886 | 0.00000 | 1.000 | 1.000 | 1a | 1 |
| 111 P  | P11  | 0.77143 | 0.45725 | 0.00000 | 1.000 | 1.000 | 1a | 1 |
| 112 P  | P12  | 0.77143 | 0.95725 | 0.00000 | 1.000 | 1.000 | 1a | 1 |
| 113 P  | P13  | 0.08693 | 0.45321 | 0.06562 | 1.000 | 1.000 | 1a | 1 |
| 114 P  | P14  | 0.08693 | 0.95321 | 0.06562 | 1.000 | 1.000 | 1a | 1 |
| 115 P  | P15  | 0.20538 | 0.29402 | 0.06562 | 1.000 | 1.000 | 1a | 1 |
| 116 P  | P16  | 0.20538 | 0.79402 | 0.06562 | 1.000 | 1.000 | 1a | 1 |
| 117 P  | P17  | 0.32908 | 0.45438 | 0.06562 | 1.000 | 1.000 | 1a | 1 |
| 118 P  | P18  | 0.32908 | 0.95438 | 0.06562 | 1.000 | 1.000 | 1a | 1 |
| 119 P  | P19  | 0.44768 | 0.29725 | 0.06562 | 1.000 | 1.000 | 1a | 1 |
| 120 P  | P20  | 0.44768 | 0.79725 | 0.06562 | 1.000 | 1.000 | 1a | 1 |
| 121 P  | P21  | 0.59766 | 0.46715 | 0.06562 | 1.000 | 1.000 | 1a | 1 |
| 122 P  | P22  | 0.59766 | 0.96715 | 0.06562 | 1.000 | 1.000 | 1a | 1 |
| 123 P  | P23  | 0.68981 | 0.21162 | 0.06562 | 1.000 | 1.000 | 1a | 1 |
| 124 P  | P24  | 0.68981 | 0.71162 | 0.06562 | 1.000 | 1.000 | 1a | 1 |
| 125 P  | P25  | 0.85529 | 0.21141 | 0.06562 | 1.000 | 1.000 | 1a | 1 |
| 126 P  | P26  | 0.85529 | 0.71141 | 0.06562 | 1.000 | 1.000 | 1a | 1 |
| 127 P  | P27  | 0.93738 | 0.46256 | 0.06562 | 1.000 | 1.000 | 1a | 1 |
| 128 P  | P28  | 0.93738 | 0.96256 | 0.06562 | 1.000 | 1.000 | 1a | 1 |
| 129 P  | P29  | 0.03746 | 0.21394 | 0.13125 | 1.000 | 1.000 | 1a | 1 |
| 130 P  | P30  | 0.03746 | 0.71394 | 0.13125 | 1.000 | 1.000 | 1a | 1 |
| 131 P  | P31  | 0.17801 | 0.04371 | 0.13125 | 1.000 | 1.000 | 1a | 1 |
| 132 P  | P32  | 0.17801 | 0.54371 | 0.13125 | 1.000 | 1.000 | 1a | 1 |

|       |     |         |         |         |       |       |    |   |
|-------|-----|---------|---------|---------|-------|-------|----|---|
| 133 P | P33 | 0.30152 | 0.20524 | 0.13125 | 1.000 | 1.000 | 1a | 1 |
| 134 P | P34 | 0.30152 | 0.70524 | 0.13125 | 1.000 | 1.000 | 1a | 1 |
| 135 P | P35 | 0.42559 | 0.04086 | 0.13125 | 1.000 | 1.000 | 1a | 1 |
| 136 P | P36 | 0.42559 | 0.54086 | 0.13125 | 1.000 | 1.000 | 1a | 1 |
| 137 P | P37 | 0.53204 | 0.20422 | 0.13125 | 1.000 | 1.000 | 1a | 1 |
| 138 P | P38 | 0.53204 | 0.70422 | 0.13125 | 1.000 | 1.000 | 1a | 1 |
| 139 P | P39 | 0.77155 | 0.45710 | 0.13125 | 1.000 | 1.000 | 1a | 1 |
| 140 P | P40 | 0.77155 | 0.95710 | 0.13125 | 1.000 | 1.000 | 1a | 1 |
| 141 P | P41 | 0.08574 | 0.45725 | 0.19774 | 1.000 | 1.000 | 1a | 1 |
| 142 P | P42 | 0.08556 | 0.95732 | 0.19764 | 1.000 | 1.000 | 1a | 1 |
| 143 P | P43 | 0.20531 | 0.28366 | 0.19700 | 1.000 | 1.000 | 1a | 1 |
| 144 P | P44 | 0.20548 | 0.78310 | 0.19671 | 1.000 | 1.000 | 1a | 1 |
| 145 P | P45 | 0.33200 | 0.46270 | 0.19811 | 1.000 | 1.000 | 1a | 1 |
| 146 P | P46 | 0.33214 | 0.96439 | 0.19801 | 1.000 | 1.000 | 1a | 1 |
| 147 P | P47 | 0.45517 | 0.28460 | 0.20036 | 1.000 | 1.000 | 1a | 1 |
| 148 P | P48 | 0.45255 | 0.78382 | 0.19816 | 1.000 | 1.000 | 1a | 1 |
| 149 P | P49 | 0.59626 | 0.46662 | 0.19929 | 1.000 | 1.000 | 1a | 1 |
| 150 P | P50 | 0.59772 | 0.97226 | 0.21105 | 1.000 | 1.000 | 1a | 1 |
| 151 P | P51 | 0.68950 | 0.21040 | 0.19814 | 1.000 | 1.000 | 1a | 1 |
| 152 P | P52 | 0.68736 | 0.70783 | 0.20502 | 1.000 | 1.000 | 1a | 1 |
| 153 P | P53 | 0.85548 | 0.21216 | 0.20333 | 1.000 | 1.000 | 1a | 1 |
| 154 P | P54 | 0.85475 | 0.71202 | 0.20276 | 1.000 | 1.000 | 1a | 1 |
| 155 P | P55 | 0.93458 | 0.46766 | 0.20055 | 1.000 | 1.000 | 1a | 1 |
| 156 P | P56 | 0.93356 | 0.96759 | 0.20127 | 1.000 | 1.000 | 1a | 1 |
| 157 P | P57 | 0.02968 | 0.22415 | 0.26238 | 1.000 | 1.000 | 1a | 1 |
| 158 P | P58 | 0.02856 | 0.72477 | 0.26259 | 1.000 | 1.000 | 1a | 1 |
| 159 P | P59 | 0.17238 | 0.02151 | 0.26331 | 1.000 | 1.000 | 1a | 1 |
| 160 P | P60 | 0.17263 | 0.52208 | 0.26354 | 1.000 | 1.000 | 1a | 1 |
| 161 P | P61 | 0.30009 | 0.22261 | 0.26529 | 1.000 | 1.000 | 1a | 1 |
| 162 P | P62 | 0.29916 | 0.72234 | 0.26519 | 1.000 | 1.000 | 1a | 1 |
| 163 P | P63 | 0.42398 | 0.03235 | 0.26699 | 1.000 | 1.000 | 1a | 1 |
| 164 P | P64 | 0.42642 | 0.53097 | 0.26734 | 1.000 | 1.000 | 1a | 1 |
| 165 P | P65 | 0.54220 | 0.20358 | 0.27514 | 1.000 | 1.000 | 1a | 1 |
| 166 P | P66 | 0.53140 | 0.71112 | 0.27670 | 1.000 | 1.000 | 1a | 1 |
| 167 P | P67 | 0.77137 | 0.45604 | 0.26878 | 1.000 | 1.000 | 1a | 1 |
| 168 P | P68 | 0.76909 | 0.95982 | 0.26937 | 1.000 | 1.000 | 1a | 1 |
| 169 O | O1  | 0.60738 | 0.40822 | 0.33687 | 1.000 | 1.000 | 1a | 1 |
| 170 H | H1  | 0.60229 | 0.48961 | 0.35085 | 1.000 | 1.000 | 1a | 1 |
| 171 H | H2  | 0.58312 | 0.35477 | 0.36096 | 1.000 | 1.000 | 1a | 1 |

=====  
=====

## NiCoP H<sub>2</sub>O\*

Title CoNiP(0\0\2)

Lattice type P

Space group name P 1

Space group number 1

Setting number 1

### Lattice parameters

| a       | b        | c        | alpha   | beta    | gamma   |
|---------|----------|----------|---------|---------|---------|
| 9.95430 | 11.49420 | 25.00000 | 90.0000 | 90.0000 | 90.0000 |

Unit-cell volume = 2860.417794 Å<sup>3</sup>

### Structure parameters

|    |         | x       | y       | z       | Occ.  | U     | Site | Sym. |
|----|---------|---------|---------|---------|-------|-------|------|------|
| 1  | Co Co1  | 0.00000 | 0.36922 | 0.06562 | 1.000 | 1.000 | 1a   | 1    |
| 2  | Co Co2  | 0.00000 | 0.86922 | 0.06562 | 1.000 | 1.000 | 1a   | 1    |
| 3  | Co Co3  | 0.13078 | 0.06539 | 0.06562 | 1.000 | 1.000 | 1a   | 1    |
| 4  | Co Co4  | 0.13078 | 0.56539 | 0.06562 | 1.000 | 1.000 | 1a   | 1    |
| 5  | Co Co5  | 0.36922 | 0.31539 | 0.06562 | 1.000 | 1.000 | 1a   | 1    |
| 6  | Co Co6  | 0.36922 | 0.81539 | 0.06562 | 1.000 | 1.000 | 1a   | 1    |
| 7  | Co Co7  | 0.50000 | 0.11922 | 0.06562 | 1.000 | 1.000 | 1a   | 1    |
| 8  | Co Co8  | 0.50000 | 0.61922 | 0.06562 | 1.000 | 1.000 | 1a   | 1    |
| 9  | Co Co9  | 0.63078 | 0.31539 | 0.06562 | 1.000 | 1.000 | 1a   | 1    |
| 10 | Co Co10 | 0.63078 | 0.81539 | 0.06562 | 1.000 | 1.000 | 1a   | 1    |
| 11 | Co Co11 | 0.86922 | 0.06539 | 0.06562 | 1.000 | 1.000 | 1a   | 1    |
| 12 | Co Co12 | 0.86922 | 0.56539 | 0.06562 | 1.000 | 1.000 | 1a   | 1    |
| 13 | Co Co13 | 0.00000 | 0.36990 | 0.19845 | 1.000 | 1.000 | 1a   | 1    |
| 14 | Co Co14 | 0.00000 | 0.86990 | 0.19845 | 1.000 | 1.000 | 1a   | 1    |
| 15 | Co Co15 | 0.13094 | 0.06550 | 0.19827 | 1.000 | 1.000 | 1a   | 1    |
| 16 | Co Co16 | 0.13094 | 0.56550 | 0.19827 | 1.000 | 1.000 | 1a   | 1    |
| 17 | Co Co17 | 0.36906 | 0.31550 | 0.19827 | 1.000 | 1.000 | 1a   | 1    |
| 18 | Co Co18 | 0.36906 | 0.81550 | 0.19827 | 1.000 | 1.000 | 1a   | 1    |
| 19 | Co Co19 | 0.50000 | 0.11990 | 0.19845 | 1.000 | 1.000 | 1a   | 1    |
| 20 | Co Co20 | 0.50000 | 0.61990 | 0.19845 | 1.000 | 1.000 | 1a   | 1    |
| 21 | Co Co21 | 0.63094 | 0.31550 | 0.19827 | 1.000 | 1.000 | 1a   | 1    |
| 22 | Co Co22 | 0.63094 | 0.81550 | 0.19827 | 1.000 | 1.000 | 1a   | 1    |
| 23 | Co Co23 | 0.86906 | 0.06550 | 0.19827 | 1.000 | 1.000 | 1a   | 1    |
| 24 | Co Co24 | 0.86906 | 0.56550 | 0.19827 | 1.000 | 1.000 | 1a   | 1    |

|       |      |         |         |         |       |       |    |   |
|-------|------|---------|---------|---------|-------|-------|----|---|
| 25 Ni | Ni1  | 0.00000 | 0.19753 | 0.00000 | 1.000 | 1.000 | 1a | 1 |
| 26 Ni | Ni2  | 0.00000 | 0.69753 | 0.00000 | 1.000 | 1.000 | 1a | 1 |
| 27 Ni | Ni3  | 0.19753 | 0.40124 | 0.00000 | 1.000 | 1.000 | 1a | 1 |
| 28 Ni | Ni4  | 0.19753 | 0.90124 | 0.00000 | 1.000 | 1.000 | 1a | 1 |
| 29 Ni | Ni5  | 0.30247 | 0.15124 | 0.00000 | 1.000 | 1.000 | 1a | 1 |
| 30 Ni | Ni6  | 0.30247 | 0.65124 | 0.00000 | 1.000 | 1.000 | 1a | 1 |
| 31 Ni | Ni7  | 0.50000 | 0.44753 | 0.00000 | 1.000 | 1.000 | 1a | 1 |
| 32 Ni | Ni8  | 0.50000 | 0.94753 | 0.00000 | 1.000 | 1.000 | 1a | 1 |
| 33 Ni | Ni9  | 0.69753 | 0.15124 | 0.00000 | 1.000 | 1.000 | 1a | 1 |
| 34 Ni | Ni10 | 0.69753 | 0.65124 | 0.00000 | 1.000 | 1.000 | 1a | 1 |
| 35 Ni | Ni11 | 0.80247 | 0.40124 | 0.00000 | 1.000 | 1.000 | 1a | 1 |
| 36 Ni | Ni12 | 0.80247 | 0.90124 | 0.00000 | 1.000 | 1.000 | 1a | 1 |
| 37 Ni | Ni13 | 0.00000 | 0.19753 | 0.13125 | 1.000 | 1.000 | 1a | 1 |
| 38 Ni | Ni14 | 0.00000 | 0.69753 | 0.13125 | 1.000 | 1.000 | 1a | 1 |
| 39 Ni | Ni15 | 0.19753 | 0.40124 | 0.13125 | 1.000 | 1.000 | 1a | 1 |
| 40 Ni | Ni16 | 0.19753 | 0.90124 | 0.13125 | 1.000 | 1.000 | 1a | 1 |
| 41 Ni | Ni17 | 0.30247 | 0.15124 | 0.13125 | 1.000 | 1.000 | 1a | 1 |
| 42 Ni | Ni18 | 0.30247 | 0.65124 | 0.13125 | 1.000 | 1.000 | 1a | 1 |
| 43 Ni | Ni19 | 0.50000 | 0.44753 | 0.13125 | 1.000 | 1.000 | 1a | 1 |
| 44 Ni | Ni20 | 0.50000 | 0.94753 | 0.13125 | 1.000 | 1.000 | 1a | 1 |
| 45 Ni | Ni21 | 0.69753 | 0.15124 | 0.13125 | 1.000 | 1.000 | 1a | 1 |
| 46 Ni | Ni22 | 0.69753 | 0.65124 | 0.13125 | 1.000 | 1.000 | 1a | 1 |
| 47 Ni | Ni23 | 0.80247 | 0.40124 | 0.13125 | 1.000 | 1.000 | 1a | 1 |
| 48 Ni | Ni24 | 0.80247 | 0.90124 | 0.13125 | 1.000 | 1.000 | 1a | 1 |
| 49 Ni | Ni25 | 0.00000 | 0.19434 | 0.26006 | 1.000 | 1.000 | 1a | 1 |
| 50 Ni | Ni26 | 0.00000 | 0.69434 | 0.26006 | 1.000 | 1.000 | 1a | 1 |
| 51 Ni | Ni27 | 0.19450 | 0.40217 | 0.26022 | 1.000 | 1.000 | 1a | 1 |
| 52 Ni | Ni28 | 0.19450 | 0.90217 | 0.26022 | 1.000 | 1.000 | 1a | 1 |
| 53 Ni | Ni29 | 0.30550 | 0.15217 | 0.26022 | 1.000 | 1.000 | 1a | 1 |
| 54 Ni | Ni30 | 0.30550 | 0.65217 | 0.26022 | 1.000 | 1.000 | 1a | 1 |
| 55 Ni | Ni31 | 0.50000 | 0.44434 | 0.26006 | 1.000 | 1.000 | 1a | 1 |
| 56 Ni | Ni32 | 0.50000 | 0.94434 | 0.26006 | 1.000 | 1.000 | 1a | 1 |
| 57 Ni | Ni33 | 0.69450 | 0.15217 | 0.26022 | 1.000 | 1.000 | 1a | 1 |
| 58 Ni | Ni34 | 0.69450 | 0.65217 | 0.26022 | 1.000 | 1.000 | 1a | 1 |
| 59 Ni | Ni35 | 0.80550 | 0.40217 | 0.26022 | 1.000 | 1.000 | 1a | 1 |
| 60 Ni | Ni36 | 0.80550 | 0.90217 | 0.26022 | 1.000 | 1.000 | 1a | 1 |
| 61 P  | P1   | 0.00000 | 0.00000 | 0.00000 | 1.000 | 1.000 | 1a | 1 |
| 62 P  | P2   | 0.00000 | 0.50000 | 0.00000 | 1.000 | 1.000 | 1a | 1 |
| 63 P  | P3   | 0.50000 | 0.25000 | 0.00000 | 1.000 | 1.000 | 1a | 1 |
| 64 P  | P4   | 0.50000 | 0.75000 | 0.00000 | 1.000 | 1.000 | 1a | 1 |
| 65 P  | P5   | 0.16667 | 0.25000 | 0.06562 | 1.000 | 1.000 | 1a | 1 |
| 66 P  | P6   | 0.16667 | 0.75000 | 0.06562 | 1.000 | 1.000 | 1a | 1 |
| 67 P  | P7   | 0.33333 | 0.00000 | 0.06562 | 1.000 | 1.000 | 1a | 1 |
| 68 P  | P8   | 0.33333 | 0.50000 | 0.06562 | 1.000 | 1.000 | 1a | 1 |

|      |     |         |         |         |       |       |    |   |
|------|-----|---------|---------|---------|-------|-------|----|---|
| 69 P | P9  | 0.66667 | 0.00000 | 0.06562 | 1.000 | 1.000 | 1a | 1 |
| 70 P | P10 | 0.66667 | 0.50000 | 0.06562 | 1.000 | 1.000 | 1a | 1 |
| 71 P | P11 | 0.83333 | 0.25000 | 0.06562 | 1.000 | 1.000 | 1a | 1 |
| 72 P | P12 | 0.83333 | 0.75000 | 0.06562 | 1.000 | 1.000 | 1a | 1 |
| 73 P | P13 | 0.00000 | 0.00000 | 0.13125 | 1.000 | 1.000 | 1a | 1 |
| 74 P | P14 | 0.00000 | 0.50000 | 0.13125 | 1.000 | 1.000 | 1a | 1 |
| 75 P | P15 | 0.50000 | 0.25000 | 0.13125 | 1.000 | 1.000 | 1a | 1 |
| 76 P | P16 | 0.50000 | 0.75000 | 0.13125 | 1.000 | 1.000 | 1a | 1 |
| 77 P | P17 | 0.16696 | 0.25025 | 0.20057 | 1.000 | 1.000 | 1a | 1 |
| 78 P | P18 | 0.16696 | 0.75025 | 0.20057 | 1.000 | 1.000 | 1a | 1 |
| 79 P | P19 | 0.33303 | 0.00025 | 0.20057 | 1.000 | 1.000 | 1a | 1 |
| 80 P | P20 | 0.33303 | 0.50025 | 0.20057 | 1.000 | 1.000 | 1a | 1 |
| 81 P | P21 | 0.66697 | 0.00025 | 0.20057 | 1.000 | 1.000 | 1a | 1 |
| 82 P | P22 | 0.66697 | 0.50025 | 0.20057 | 1.000 | 1.000 | 1a | 1 |
| 83 P | P23 | 0.83303 | 0.25025 | 0.20057 | 1.000 | 1.000 | 1a | 1 |
| 84 P | P24 | 0.83303 | 0.75025 | 0.20057 | 1.000 | 1.000 | 1a | 1 |
| 85 P | P25 | 0.00000 | 0.99926 | 0.26667 | 1.000 | 1.000 | 1a | 1 |
| 86 P | P26 | 0.00000 | 0.49926 | 0.26667 | 1.000 | 1.000 | 1a | 1 |
| 87 P | P27 | 0.50000 | 0.24926 | 0.26667 | 1.000 | 1.000 | 1a | 1 |
| 88 P | P28 | 0.50000 | 0.74926 | 0.26667 | 1.000 | 1.000 | 1a | 1 |
| 89 O | O1  | 0.50479 | 0.49791 | 0.34521 | 1.000 | 1.000 | 1a | 1 |
| 90 H | H1  | 0.58956 | 0.54126 | 0.34750 | 1.000 | 1.000 | 1a | 1 |
| 91 H | H2  | 0.43632 | 0.55944 | 0.34485 | 1.000 | 1.000 | 1a | 1 |

=====  
=====

### CoP H-OH\*

=====  
=====

Title                    Co   P   O   H

Lattice type            P

Space group name      P 1

Space group number    1

Setting number         1

Lattice parameters

| a        | b        | c        | alpha   | beta    | gamma   |
|----------|----------|----------|---------|---------|---------|
| 10.05150 | 11.00530 | 25.00000 | 90.0000 | 90.0000 | 90.0000 |

Unit-cell volume = 2765.494303 Å<sup>3</sup>

Structure parameters

|    |         | x       | y       | z       | Occ.  | U     | Site | Sym. |
|----|---------|---------|---------|---------|-------|-------|------|------|
| 1  | Co Co1  | 0.24946 | 0.34874 | 0.00000 | 1.000 | 1.000 | 1a   | 1    |
| 2  | Co Co2  | 0.24946 | 0.84874 | 0.00000 | 1.000 | 1.000 | 1a   | 1    |
| 3  | Co Co3  | 0.49946 | 0.40126 | 0.00000 | 1.000 | 1.000 | 1a   | 1    |
| 4  | Co Co4  | 0.49946 | 0.90126 | 0.00000 | 1.000 | 1.000 | 1a   | 1    |
| 5  | Co Co5  | 0.74946 | 0.34874 | 0.00000 | 1.000 | 1.000 | 1a   | 1    |
| 6  | Co Co6  | 0.74946 | 0.84874 | 0.00000 | 1.000 | 1.000 | 1a   | 1    |
| 7  | Co Co7  | 0.99946 | 0.40126 | 0.00000 | 1.000 | 1.000 | 1a   | 1    |
| 8  | Co Co8  | 0.99946 | 0.90126 | 0.00000 | 1.000 | 1.000 | 1a   | 1    |
| 9  | Co Co9  | 0.00054 | 0.09874 | 0.06562 | 1.000 | 1.000 | 1a   | 1    |
| 10 | Co Co10 | 0.00054 | 0.59874 | 0.06562 | 1.000 | 1.000 | 1a   | 1    |
| 11 | Co Co11 | 0.25054 | 0.15126 | 0.06562 | 1.000 | 1.000 | 1a   | 1    |
| 12 | Co Co12 | 0.25054 | 0.65126 | 0.06562 | 1.000 | 1.000 | 1a   | 1    |
| 13 | Co Co13 | 0.50054 | 0.09874 | 0.06562 | 1.000 | 1.000 | 1a   | 1    |
| 14 | Co Co14 | 0.50054 | 0.59874 | 0.06562 | 1.000 | 1.000 | 1a   | 1    |
| 15 | Co Co15 | 0.75054 | 0.15126 | 0.06562 | 1.000 | 1.000 | 1a   | 1    |
| 16 | Co Co16 | 0.75054 | 0.65126 | 0.06562 | 1.000 | 1.000 | 1a   | 1    |
| 17 | Co Co17 | 0.24946 | 0.34874 | 0.13125 | 1.000 | 1.000 | 1a   | 1    |
| 18 | Co Co18 | 0.24946 | 0.84874 | 0.13125 | 1.000 | 1.000 | 1a   | 1    |
| 19 | Co Co19 | 0.49946 | 0.40126 | 0.13125 | 1.000 | 1.000 | 1a   | 1    |
| 20 | Co Co20 | 0.49946 | 0.90126 | 0.13125 | 1.000 | 1.000 | 1a   | 1    |
| 21 | Co Co21 | 0.74946 | 0.34874 | 0.13125 | 1.000 | 1.000 | 1a   | 1    |
| 22 | Co Co22 | 0.74946 | 0.84874 | 0.13125 | 1.000 | 1.000 | 1a   | 1    |
| 23 | Co Co23 | 0.99946 | 0.40126 | 0.13125 | 1.000 | 1.000 | 1a   | 1    |
| 24 | Co Co24 | 0.99946 | 0.90126 | 0.13125 | 1.000 | 1.000 | 1a   | 1    |
| 25 | Co Co25 | 0.99782 | 0.10244 | 0.19589 | 1.000 | 1.000 | 1a   | 1    |
| 26 | Co Co26 | 0.99782 | 0.60244 | 0.19589 | 1.000 | 1.000 | 1a   | 1    |
| 27 | Co Co27 | 0.24781 | 0.14756 | 0.19589 | 1.000 | 1.000 | 1a   | 1    |
| 28 | Co Co28 | 0.24781 | 0.64756 | 0.19589 | 1.000 | 1.000 | 1a   | 1    |
| 29 | Co Co29 | 0.49782 | 0.10244 | 0.19589 | 1.000 | 1.000 | 1a   | 1    |
| 30 | Co Co30 | 0.49782 | 0.60244 | 0.19589 | 1.000 | 1.000 | 1a   | 1    |
| 31 | Co Co31 | 0.74782 | 0.14756 | 0.19589 | 1.000 | 1.000 | 1a   | 1    |
| 32 | Co Co32 | 0.74782 | 0.64756 | 0.19589 | 1.000 | 1.000 | 1a   | 1    |
| 33 | Co Co33 | 0.25280 | 0.35049 | 0.25144 | 1.000 | 1.000 | 1a   | 1    |
| 34 | Co Co34 | 0.25139 | 0.84649 | 0.25035 | 1.000 | 1.000 | 1a   | 1    |
| 35 | Co Co35 | 0.50369 | 0.39860 | 0.25486 | 1.000 | 1.000 | 1a   | 1    |
| 36 | Co Co36 | 0.50198 | 0.90248 | 0.25095 | 1.000 | 1.000 | 1a   | 1    |
| 37 | Co Co37 | 0.75325 | 0.34650 | 0.25061 | 1.000 | 1.000 | 1a   | 1    |
| 38 | Co Co38 | 0.75198 | 0.84719 | 0.25020 | 1.000 | 1.000 | 1a   | 1    |
| 39 | Co Co39 | 0.00286 | 0.40270 | 0.25176 | 1.000 | 1.000 | 1a   | 1    |
| 40 | Co Co40 | 0.00249 | 0.90206 | 0.25101 | 1.000 | 1.000 | 1a   | 1    |

|      |     |         |         |         |       |       |    |   |
|------|-----|---------|---------|---------|-------|-------|----|---|
| 41 P | P1  | 0.09583 | 0.20919 | 0.00000 | 1.000 | 1.000 | 1a | 1 |
| 42 P | P2  | 0.09583 | 0.70919 | 0.00000 | 1.000 | 1.000 | 1a | 1 |
| 43 P | P3  | 0.34583 | 0.04081 | 0.00000 | 1.000 | 1.000 | 1a | 1 |
| 44 P | P4  | 0.34583 | 0.54081 | 0.00000 | 1.000 | 1.000 | 1a | 1 |
| 45 P | P5  | 0.59583 | 0.20919 | 0.00000 | 1.000 | 1.000 | 1a | 1 |
| 46 P | P6  | 0.59583 | 0.70919 | 0.00000 | 1.000 | 1.000 | 1a | 1 |
| 47 P | P7  | 0.84583 | 0.04081 | 0.00000 | 1.000 | 1.000 | 1a | 1 |
| 48 P | P8  | 0.84583 | 0.54081 | 0.00000 | 1.000 | 1.000 | 1a | 1 |
| 49 P | P9  | 0.15417 | 0.45919 | 0.06562 | 1.000 | 1.000 | 1a | 1 |
| 50 P | P10 | 0.15417 | 0.95919 | 0.06562 | 1.000 | 1.000 | 1a | 1 |
| 51 P | P11 | 0.40417 | 0.29081 | 0.06562 | 1.000 | 1.000 | 1a | 1 |
| 52 P | P12 | 0.40417 | 0.79081 | 0.06562 | 1.000 | 1.000 | 1a | 1 |
| 53 P | P13 | 0.65417 | 0.45919 | 0.06562 | 1.000 | 1.000 | 1a | 1 |
| 54 P | P14 | 0.65417 | 0.95919 | 0.06562 | 1.000 | 1.000 | 1a | 1 |
| 55 P | P15 | 0.90417 | 0.29081 | 0.06562 | 1.000 | 1.000 | 1a | 1 |
| 56 P | P16 | 0.90417 | 0.79081 | 0.06562 | 1.000 | 1.000 | 1a | 1 |
| 57 P | P17 | 0.09583 | 0.20919 | 0.13125 | 1.000 | 1.000 | 1a | 1 |
| 58 P | P18 | 0.09583 | 0.70919 | 0.13125 | 1.000 | 1.000 | 1a | 1 |
| 59 P | P19 | 0.34583 | 0.04081 | 0.13125 | 1.000 | 1.000 | 1a | 1 |
| 60 P | P20 | 0.34583 | 0.54081 | 0.13125 | 1.000 | 1.000 | 1a | 1 |
| 61 P | P21 | 0.59583 | 0.20919 | 0.13125 | 1.000 | 1.000 | 1a | 1 |
| 62 P | P22 | 0.59583 | 0.70919 | 0.13125 | 1.000 | 1.000 | 1a | 1 |
| 63 P | P23 | 0.84583 | 0.04081 | 0.13125 | 1.000 | 1.000 | 1a | 1 |
| 64 P | P24 | 0.84583 | 0.54081 | 0.13125 | 1.000 | 1.000 | 1a | 1 |
| 65 P | P25 | 0.15513 | 0.46395 | 0.19702 | 1.000 | 1.000 | 1a | 1 |
| 66 P | P26 | 0.15513 | 0.96395 | 0.19702 | 1.000 | 1.000 | 1a | 1 |
| 67 P | P27 | 0.40513 | 0.28605 | 0.19702 | 1.000 | 1.000 | 1a | 1 |
| 68 P | P28 | 0.40513 | 0.78605 | 0.19702 | 1.000 | 1.000 | 1a | 1 |
| 69 P | P29 | 0.65513 | 0.46395 | 0.19702 | 1.000 | 1.000 | 1a | 1 |
| 70 P | P30 | 0.65513 | 0.96395 | 0.19702 | 1.000 | 1.000 | 1a | 1 |
| 71 P | P31 | 0.90513 | 0.28605 | 0.19702 | 1.000 | 1.000 | 1a | 1 |
| 72 P | P32 | 0.90513 | 0.78605 | 0.19702 | 1.000 | 1.000 | 1a | 1 |
| 73 P | P33 | 0.09083 | 0.22107 | 0.26424 | 1.000 | 1.000 | 1a | 1 |
| 74 P | P34 | 0.08958 | 0.71942 | 0.26493 | 1.000 | 1.000 | 1a | 1 |
| 75 P | P35 | 0.33658 | 0.02621 | 0.26574 | 1.000 | 1.000 | 1a | 1 |
| 76 P | P36 | 0.34519 | 0.53223 | 0.26263 | 1.000 | 1.000 | 1a | 1 |
| 77 P | P37 | 0.59988 | 0.21033 | 0.26413 | 1.000 | 1.000 | 1a | 1 |
| 78 P | P38 | 0.59164 | 0.72010 | 0.26538 | 1.000 | 1.000 | 1a | 1 |
| 79 P | P39 | 0.83777 | 0.02718 | 0.26613 | 1.000 | 1.000 | 1a | 1 |
| 80 P | P40 | 0.83698 | 0.52722 | 0.26627 | 1.000 | 1.000 | 1a | 1 |
| 81 O | O1  | 0.49747 | 0.40291 | 0.33088 | 1.000 | 1.000 | 1a | 1 |
| 82 H | H1  | 0.42704 | 0.35342 | 0.34694 | 1.000 | 1.000 | 1a | 1 |
| 83 H | H2  | 0.35760 | 0.58084 | 0.31539 | 1.000 | 1.000 | 1a | 1 |



=====  
**NiCoP-CoP H-OH\***  
=====

=====  
Title                    Co   Ni   P   O   H

Lattice type            P  
Space group name      P 1  
Space group number    1  
Setting number        1

Lattice parameters

      a        b        c        alpha    beta    gamma  
20.00560 11.24700 25.00000 90.0000 90.0000 90.0000

Unit-cell volume = 5625.074443 Å<sup>3</sup>

Structure parameters

|       |      | x       | y       | z       | Occ.  | U     | Site | Sym. |
|-------|------|---------|---------|---------|-------|-------|------|------|
| 1 Co  | Co1  | 0.00675 | 0.40905 | 0.00000 | 1.000 | 1.000 | 1a   | 1    |
| 2 Co  | Co2  | 0.00675 | 0.90905 | 0.00000 | 1.000 | 1.000 | 1a   | 1    |
| 3 Co  | Co3  | 0.12814 | 0.34862 | 0.00000 | 1.000 | 1.000 | 1a   | 1    |
| 4 Co  | Co4  | 0.12814 | 0.84862 | 0.00000 | 1.000 | 1.000 | 1a   | 1    |
| 5 Co  | Co5  | 0.25523 | 0.39733 | 0.00000 | 1.000 | 1.000 | 1a   | 1    |
| 6 Co  | Co6  | 0.25523 | 0.89733 | 0.00000 | 1.000 | 1.000 | 1a   | 1    |
| 7 Co  | Co7  | 0.38277 | 0.35161 | 0.00000 | 1.000 | 1.000 | 1a   | 1    |
| 8 Co  | Co8  | 0.38277 | 0.85161 | 0.00000 | 1.000 | 1.000 | 1a   | 1    |
| 9 Co  | Co9  | 0.01686 | 0.09208 | 0.06562 | 1.000 | 1.000 | 1a   | 1    |
| 10 Co | Co10 | 0.01686 | 0.59208 | 0.06562 | 1.000 | 1.000 | 1a   | 1    |
| 11 Co | Co11 | 0.13517 | 0.14703 | 0.06562 | 1.000 | 1.000 | 1a   | 1    |
| 12 Co | Co12 | 0.13517 | 0.64703 | 0.06562 | 1.000 | 1.000 | 1a   | 1    |
| 13 Co | Co13 | 0.25705 | 0.10125 | 0.06562 | 1.000 | 1.000 | 1a   | 1    |
| 14 Co | Co14 | 0.25705 | 0.60125 | 0.06562 | 1.000 | 1.000 | 1a   | 1    |
| 15 Co | Co15 | 0.37959 | 0.14467 | 0.06562 | 1.000 | 1.000 | 1a   | 1    |
| 16 Co | Co16 | 0.37959 | 0.64467 | 0.06562 | 1.000 | 1.000 | 1a   | 1    |
| 17 Co | Co17 | 0.50387 | 0.08464 | 0.06562 | 1.000 | 1.000 | 1a   | 1    |
| 18 Co | Co18 | 0.50387 | 0.58464 | 0.06562 | 1.000 | 1.000 | 1a   | 1    |
| 19 Co | Co19 | 0.58720 | 0.27888 | 0.06562 | 1.000 | 1.000 | 1a   | 1    |
| 20 Co | Co20 | 0.58720 | 0.77888 | 0.06562 | 1.000 | 1.000 | 1a   | 1    |

|       |      |         |         |         |       |       |    |   |
|-------|------|---------|---------|---------|-------|-------|----|---|
| 21 Co | Co21 | 0.70394 | 0.02381 | 0.06562 | 1.000 | 1.000 | 1a | 1 |
| 22 Co | Co22 | 0.70394 | 0.52381 | 0.06562 | 1.000 | 1.000 | 1a | 1 |
| 23 Co | Co23 | 0.77258 | 0.32820 | 0.06562 | 1.000 | 1.000 | 1a | 1 |
| 24 Co | Co24 | 0.77258 | 0.82820 | 0.06562 | 1.000 | 1.000 | 1a | 1 |
| 25 Co | Co25 | 0.83653 | 0.02678 | 0.06562 | 1.000 | 1.000 | 1a | 1 |
| 26 Co | Co26 | 0.83653 | 0.52678 | 0.06562 | 1.000 | 1.000 | 1a | 1 |
| 27 Co | Co27 | 0.95638 | 0.27536 | 0.06562 | 1.000 | 1.000 | 1a | 1 |
| 28 Co | Co28 | 0.95638 | 0.77536 | 0.06562 | 1.000 | 1.000 | 1a | 1 |
| 29 Co | Co29 | 0.01381 | 0.40341 | 0.13125 | 1.000 | 1.000 | 1a | 1 |
| 30 Co | Co30 | 0.01381 | 0.90341 | 0.13125 | 1.000 | 1.000 | 1a | 1 |
| 31 Co | Co31 | 0.13239 | 0.34729 | 0.13125 | 1.000 | 1.000 | 1a | 1 |
| 32 Co | Co32 | 0.13239 | 0.84729 | 0.13125 | 1.000 | 1.000 | 1a | 1 |
| 33 Co | Co33 | 0.25310 | 0.39909 | 0.13125 | 1.000 | 1.000 | 1a | 1 |
| 34 Co | Co34 | 0.25310 | 0.89909 | 0.13125 | 1.000 | 1.000 | 1a | 1 |
| 35 Co | Co35 | 0.37623 | 0.35070 | 0.13125 | 1.000 | 1.000 | 1a | 1 |
| 36 Co | Co36 | 0.37623 | 0.85070 | 0.13125 | 1.000 | 1.000 | 1a | 1 |
| 37 Co | Co37 | 0.01463 | 0.09453 | 0.19676 | 1.000 | 1.000 | 1a | 1 |
| 38 Co | Co38 | 0.01527 | 0.59530 | 0.19680 | 1.000 | 1.000 | 1a | 1 |
| 39 Co | Co39 | 0.13267 | 0.14025 | 0.19686 | 1.000 | 1.000 | 1a | 1 |
| 40 Co | Co40 | 0.13342 | 0.64001 | 0.19704 | 1.000 | 1.000 | 1a | 1 |
| 41 Co | Co41 | 0.25462 | 0.10208 | 0.19821 | 1.000 | 1.000 | 1a | 1 |
| 42 Co | Co42 | 0.25576 | 0.60276 | 0.19810 | 1.000 | 1.000 | 1a | 1 |
| 43 Co | Co43 | 0.37684 | 0.14751 | 0.19735 | 1.000 | 1.000 | 1a | 1 |
| 44 Co | Co44 | 0.37920 | 0.64742 | 0.19768 | 1.000 | 1.000 | 1a | 1 |
| 45 Co | Co45 | 0.50249 | 0.09668 | 0.20049 | 1.000 | 1.000 | 1a | 1 |
| 46 Co | Co46 | 0.50560 | 0.59732 | 0.20496 | 1.000 | 1.000 | 1a | 1 |
| 47 Co | Co47 | 0.58555 | 0.27701 | 0.19954 | 1.000 | 1.000 | 1a | 1 |
| 48 Co | Co48 | 0.58251 | 0.78329 | 0.19867 | 1.000 | 1.000 | 1a | 1 |
| 49 Co | Co49 | 0.70220 | 0.02256 | 0.20049 | 1.000 | 1.000 | 1a | 1 |
| 50 Co | Co50 | 0.70268 | 0.51856 | 0.20021 | 1.000 | 1.000 | 1a | 1 |
| 51 Co | Co51 | 0.77168 | 0.32985 | 0.19861 | 1.000 | 1.000 | 1a | 1 |
| 52 Co | Co52 | 0.77020 | 0.82888 | 0.19790 | 1.000 | 1.000 | 1a | 1 |
| 53 Co | Co53 | 0.83299 | 0.02597 | 0.20042 | 1.000 | 1.000 | 1a | 1 |
| 54 Co | Co54 | 0.83405 | 0.52682 | 0.19969 | 1.000 | 1.000 | 1a | 1 |
| 55 Co | Co55 | 0.95584 | 0.28012 | 0.19749 | 1.000 | 1.000 | 1a | 1 |
| 56 Co | Co56 | 0.95506 | 0.78026 | 0.19804 | 1.000 | 1.000 | 1a | 1 |
| 57 Co | Co57 | 0.00805 | 0.41571 | 0.26111 | 1.000 | 1.000 | 1a | 1 |
| 58 Co | Co58 | 0.00802 | 0.91586 | 0.26114 | 1.000 | 1.000 | 1a | 1 |
| 59 Co | Co59 | 0.12771 | 0.33964 | 0.25403 | 1.000 | 1.000 | 1a | 1 |
| 60 Co | Co60 | 0.12780 | 0.83948 | 0.25385 | 1.000 | 1.000 | 1a | 1 |
| 61 Co | Co61 | 0.25499 | 0.39845 | 0.24985 | 1.000 | 1.000 | 1a | 1 |
| 62 Co | Co62 | 0.25522 | 0.89791 | 0.25044 | 1.000 | 1.000 | 1a | 1 |
| 63 Co | Co63 | 0.38042 | 0.35077 | 0.25278 | 1.000 | 1.000 | 1a | 1 |
| 64 Co | Co64 | 0.38148 | 0.85186 | 0.25201 | 1.000 | 1.000 | 1a | 1 |

|        |      |         |         |         |       |       |    |   |
|--------|------|---------|---------|---------|-------|-------|----|---|
| 65 Ni  | Ni1  | 0.51052 | 0.40283 | 0.00000 | 1.000 | 1.000 | 1a | 1 |
| 66 Ni  | Ni2  | 0.51052 | 0.90283 | 0.00000 | 1.000 | 1.000 | 1a | 1 |
| 67 Ni  | Ni3  | 0.62146 | 0.10806 | 0.00000 | 1.000 | 1.000 | 1a | 1 |
| 68 Ni  | Ni4  | 0.62146 | 0.60806 | 0.00000 | 1.000 | 1.000 | 1a | 1 |
| 69 Ni  | Ni5  | 0.67694 | 0.35784 | 0.00000 | 1.000 | 1.000 | 1a | 1 |
| 70 Ni  | Ni6  | 0.67694 | 0.85784 | 0.00000 | 1.000 | 1.000 | 1a | 1 |
| 71 Ni  | Ni7  | 0.76923 | 0.15455 | 0.00000 | 1.000 | 1.000 | 1a | 1 |
| 72 Ni  | Ni8  | 0.76923 | 0.65455 | 0.00000 | 1.000 | 1.000 | 1a | 1 |
| 73 Ni  | Ni9  | 0.86953 | 0.35916 | 0.00000 | 1.000 | 1.000 | 1a | 1 |
| 74 Ni  | Ni10 | 0.86953 | 0.85916 | 0.00000 | 1.000 | 1.000 | 1a | 1 |
| 75 Ni  | Ni11 | 0.93046 | 0.11273 | 0.00000 | 1.000 | 1.000 | 1a | 1 |
| 76 Ni  | Ni12 | 0.93046 | 0.61273 | 0.00000 | 1.000 | 1.000 | 1a | 1 |
| 77 Ni  | Ni13 | 0.50670 | 0.39909 | 0.13125 | 1.000 | 1.000 | 1a | 1 |
| 78 Ni  | Ni14 | 0.50670 | 0.89909 | 0.13125 | 1.000 | 1.000 | 1a | 1 |
| 79 Ni  | Ni15 | 0.62370 | 0.10922 | 0.13125 | 1.000 | 1.000 | 1a | 1 |
| 80 Ni  | Ni16 | 0.62370 | 0.60922 | 0.13125 | 1.000 | 1.000 | 1a | 1 |
| 81 Ni  | Ni17 | 0.67014 | 0.36192 | 0.13125 | 1.000 | 1.000 | 1a | 1 |
| 82 Ni  | Ni18 | 0.67014 | 0.86192 | 0.13125 | 1.000 | 1.000 | 1a | 1 |
| 83 Ni  | Ni19 | 0.77115 | 0.15432 | 0.13125 | 1.000 | 1.000 | 1a | 1 |
| 84 Ni  | Ni20 | 0.77115 | 0.65432 | 0.13125 | 1.000 | 1.000 | 1a | 1 |
| 85 Ni  | Ni21 | 0.87340 | 0.36151 | 0.13125 | 1.000 | 1.000 | 1a | 1 |
| 86 Ni  | Ni22 | 0.87340 | 0.86151 | 0.13125 | 1.000 | 1.000 | 1a | 1 |
| 87 Ni  | Ni23 | 0.91952 | 0.11549 | 0.13125 | 1.000 | 1.000 | 1a | 1 |
| 88 Ni  | Ni24 | 0.91952 | 0.61549 | 0.13125 | 1.000 | 1.000 | 1a | 1 |
| 89 Ni  | Ni25 | 0.50681 | 0.39780 | 0.25318 | 1.000 | 1.000 | 1a | 1 |
| 90 Ni  | Ni26 | 0.50679 | 0.90914 | 0.25428 | 1.000 | 1.000 | 1a | 1 |
| 91 Ni  | Ni27 | 0.63597 | 0.13127 | 0.27076 | 1.000 | 1.000 | 1a | 1 |
| 92 Ni  | Ni28 | 0.62449 | 0.61957 | 0.26295 | 1.000 | 1.000 | 1a | 1 |
| 93 Ni  | Ni29 | 0.68089 | 0.34758 | 0.27003 | 1.000 | 1.000 | 1a | 1 |
| 94 Ni  | Ni30 | 0.66980 | 0.85622 | 0.26250 | 1.000 | 1.000 | 1a | 1 |
| 95 Ni  | Ni31 | 0.77190 | 0.15611 | 0.26364 | 1.000 | 1.000 | 1a | 1 |
| 96 Ni  | Ni32 | 0.76884 | 0.65632 | 0.26229 | 1.000 | 1.000 | 1a | 1 |
| 97 Ni  | Ni33 | 0.87034 | 0.36246 | 0.26221 | 1.000 | 1.000 | 1a | 1 |
| 98 Ni  | Ni34 | 0.86758 | 0.86281 | 0.26246 | 1.000 | 1.000 | 1a | 1 |
| 99 Ni  | Ni35 | 0.92666 | 0.12242 | 0.26334 | 1.000 | 1.000 | 1a | 1 |
| 100 Ni | Ni36 | 0.92716 | 0.62170 | 0.26331 | 1.000 | 1.000 | 1a | 1 |
| 101 P  | P1   | 0.03409 | 0.21848 | 0.00000 | 1.000 | 1.000 | 1a | 1 |
| 102 P  | P2   | 0.03409 | 0.71848 | 0.00000 | 1.000 | 1.000 | 1a | 1 |
| 103 P  | P3   | 0.17390 | 0.02890 | 0.00000 | 1.000 | 1.000 | 1a | 1 |
| 104 P  | P4   | 0.17390 | 0.52890 | 0.00000 | 1.000 | 1.000 | 1a | 1 |
| 105 P  | P5   | 0.29813 | 0.21916 | 0.00000 | 1.000 | 1.000 | 1a | 1 |
| 106 P  | P6   | 0.29813 | 0.71916 | 0.00000 | 1.000 | 1.000 | 1a | 1 |
| 107 P  | P7   | 0.42362 | 0.03145 | 0.00000 | 1.000 | 1.000 | 1a | 1 |
| 108 P  | P8   | 0.42362 | 0.53145 | 0.00000 | 1.000 | 1.000 | 1a | 1 |

|       |     |         |         |         |       |       |    |   |
|-------|-----|---------|---------|---------|-------|-------|----|---|
| 109 P | P9  | 0.52912 | 0.20886 | 0.00000 | 1.000 | 1.000 | 1a | 1 |
| 110 P | P10 | 0.52912 | 0.70886 | 0.00000 | 1.000 | 1.000 | 1a | 1 |
| 111 P | P11 | 0.77143 | 0.45725 | 0.00000 | 1.000 | 1.000 | 1a | 1 |
| 112 P | P12 | 0.77143 | 0.95725 | 0.00000 | 1.000 | 1.000 | 1a | 1 |
| 113 P | P13 | 0.08693 | 0.45321 | 0.06562 | 1.000 | 1.000 | 1a | 1 |
| 114 P | P14 | 0.08693 | 0.95321 | 0.06562 | 1.000 | 1.000 | 1a | 1 |
| 115 P | P15 | 0.20538 | 0.29402 | 0.06562 | 1.000 | 1.000 | 1a | 1 |
| 116 P | P16 | 0.20538 | 0.79402 | 0.06562 | 1.000 | 1.000 | 1a | 1 |
| 117 P | P17 | 0.32908 | 0.45438 | 0.06562 | 1.000 | 1.000 | 1a | 1 |
| 118 P | P18 | 0.32908 | 0.95438 | 0.06562 | 1.000 | 1.000 | 1a | 1 |
| 119 P | P19 | 0.44768 | 0.29725 | 0.06562 | 1.000 | 1.000 | 1a | 1 |
| 120 P | P20 | 0.44768 | 0.79725 | 0.06562 | 1.000 | 1.000 | 1a | 1 |
| 121 P | P21 | 0.59766 | 0.46715 | 0.06562 | 1.000 | 1.000 | 1a | 1 |
| 122 P | P22 | 0.59766 | 0.96715 | 0.06562 | 1.000 | 1.000 | 1a | 1 |
| 123 P | P23 | 0.68981 | 0.21162 | 0.06562 | 1.000 | 1.000 | 1a | 1 |
| 124 P | P24 | 0.68981 | 0.71162 | 0.06562 | 1.000 | 1.000 | 1a | 1 |
| 125 P | P25 | 0.85529 | 0.21141 | 0.06562 | 1.000 | 1.000 | 1a | 1 |
| 126 P | P26 | 0.85529 | 0.71141 | 0.06562 | 1.000 | 1.000 | 1a | 1 |
| 127 P | P27 | 0.93738 | 0.46256 | 0.06562 | 1.000 | 1.000 | 1a | 1 |
| 128 P | P28 | 0.93738 | 0.96256 | 0.06562 | 1.000 | 1.000 | 1a | 1 |
| 129 P | P29 | 0.03746 | 0.21394 | 0.13125 | 1.000 | 1.000 | 1a | 1 |
| 130 P | P30 | 0.03746 | 0.71394 | 0.13125 | 1.000 | 1.000 | 1a | 1 |
| 131 P | P31 | 0.17801 | 0.04371 | 0.13125 | 1.000 | 1.000 | 1a | 1 |
| 132 P | P32 | 0.17801 | 0.54371 | 0.13125 | 1.000 | 1.000 | 1a | 1 |
| 133 P | P33 | 0.30152 | 0.20524 | 0.13125 | 1.000 | 1.000 | 1a | 1 |
| 134 P | P34 | 0.30152 | 0.70524 | 0.13125 | 1.000 | 1.000 | 1a | 1 |
| 135 P | P35 | 0.42559 | 0.04086 | 0.13125 | 1.000 | 1.000 | 1a | 1 |
| 136 P | P36 | 0.42559 | 0.54086 | 0.13125 | 1.000 | 1.000 | 1a | 1 |
| 137 P | P37 | 0.53204 | 0.20422 | 0.13125 | 1.000 | 1.000 | 1a | 1 |
| 138 P | P38 | 0.53204 | 0.70422 | 0.13125 | 1.000 | 1.000 | 1a | 1 |
| 139 P | P39 | 0.77155 | 0.45710 | 0.13125 | 1.000 | 1.000 | 1a | 1 |
| 140 P | P40 | 0.77155 | 0.95710 | 0.13125 | 1.000 | 1.000 | 1a | 1 |
| 141 P | P41 | 0.08591 | 0.45711 | 0.19776 | 1.000 | 1.000 | 1a | 1 |
| 142 P | P42 | 0.08560 | 0.95686 | 0.19774 | 1.000 | 1.000 | 1a | 1 |
| 143 P | P43 | 0.20525 | 0.28300 | 0.19678 | 1.000 | 1.000 | 1a | 1 |
| 144 P | P44 | 0.20568 | 0.78315 | 0.19683 | 1.000 | 1.000 | 1a | 1 |
| 145 P | P45 | 0.33254 | 0.46507 | 0.19791 | 1.000 | 1.000 | 1a | 1 |
| 146 P | P46 | 0.33168 | 0.96430 | 0.19746 | 1.000 | 1.000 | 1a | 1 |
| 147 P | P47 | 0.45285 | 0.28505 | 0.19827 | 1.000 | 1.000 | 1a | 1 |
| 148 P | P48 | 0.45701 | 0.78390 | 0.20062 | 1.000 | 1.000 | 1a | 1 |
| 149 P | P49 | 0.59747 | 0.46837 | 0.20629 | 1.000 | 1.000 | 1a | 1 |
| 150 P | P50 | 0.59717 | 0.97522 | 0.20846 | 1.000 | 1.000 | 1a | 1 |
| 151 P | P51 | 0.68931 | 0.21214 | 0.20033 | 1.000 | 1.000 | 1a | 1 |
| 152 P | P52 | 0.68717 | 0.70976 | 0.20106 | 1.000 | 1.000 | 1a | 1 |

|       |     |         |         |         |       |       |    |   |
|-------|-----|---------|---------|---------|-------|-------|----|---|
| 153 P | P53 | 0.85566 | 0.21103 | 0.20270 | 1.000 | 1.000 | 1a | 1 |
| 154 P | P54 | 0.85485 | 0.71224 | 0.20312 | 1.000 | 1.000 | 1a | 1 |
| 155 P | P55 | 0.93470 | 0.46726 | 0.20057 | 1.000 | 1.000 | 1a | 1 |
| 156 P | P56 | 0.93378 | 0.96684 | 0.20108 | 1.000 | 1.000 | 1a | 1 |
| 157 P | P57 | 0.02936 | 0.22395 | 0.26253 | 1.000 | 1.000 | 1a | 1 |
| 158 P | P58 | 0.02933 | 0.72431 | 0.26256 | 1.000 | 1.000 | 1a | 1 |
| 159 P | P59 | 0.17269 | 0.02112 | 0.26311 | 1.000 | 1.000 | 1a | 1 |
| 160 P | P60 | 0.17302 | 0.52169 | 0.26335 | 1.000 | 1.000 | 1a | 1 |
| 161 P | P61 | 0.29895 | 0.22163 | 0.26553 | 1.000 | 1.000 | 1a | 1 |
| 162 P | P62 | 0.30071 | 0.72177 | 0.26520 | 1.000 | 1.000 | 1a | 1 |
| 163 P | P63 | 0.42118 | 0.03314 | 0.26753 | 1.000 | 1.000 | 1a | 1 |
| 164 P | P64 | 0.42372 | 0.52888 | 0.26738 | 1.000 | 1.000 | 1a | 1 |
| 165 P | P65 | 0.53635 | 0.20627 | 0.27625 | 1.000 | 1.000 | 1a | 1 |
| 166 P | P66 | 0.54285 | 0.73256 | 0.28180 | 1.000 | 1.000 | 1a | 1 |
| 167 P | P67 | 0.77236 | 0.45864 | 0.26897 | 1.000 | 1.000 | 1a | 1 |
| 168 P | P68 | 0.76799 | 0.95624 | 0.26952 | 1.000 | 1.000 | 1a | 1 |
| 169 O | O1  | 0.62739 | 0.39766 | 0.33069 | 1.000 | 1.000 | 1a | 1 |
| 170 H | H1  | 0.64996 | 0.39043 | 0.36519 | 1.000 | 1.000 | 1a | 1 |
| 171 H | H2  | 0.62906 | 0.24387 | 0.30987 | 1.000 | 1.000 | 1a | 1 |

=====  
 ===

### NiCoP H-OH\*

=====  
 ===

Title                    Co   Ni   P   O   H

Lattice type            P

Space group name      P 1

Space group number    1

Setting number         1

Lattice parameters

| a       | b        | c        | alpha   | beta    | gamma   |
|---------|----------|----------|---------|---------|---------|
| 9.95430 | 11.49420 | 25.00000 | 90.0000 | 90.0000 | 90.0000 |

Unit-cell volume = 2860.417794 Å<sup>3</sup>

Structure parameters

| x | y | z | Occ. | U | Site | Sym. |
|---|---|---|------|---|------|------|
|---|---|---|------|---|------|------|

|    |    |      |         |         |         |       |       |    |   |
|----|----|------|---------|---------|---------|-------|-------|----|---|
| 1  | Co | Co1  | 0.00000 | 0.36922 | 0.06562 | 1.000 | 1.000 | 1a | 1 |
| 2  | Co | Co2  | 0.00000 | 0.86922 | 0.06562 | 1.000 | 1.000 | 1a | 1 |
| 3  | Co | Co3  | 0.13078 | 0.06539 | 0.06562 | 1.000 | 1.000 | 1a | 1 |
| 4  | Co | Co4  | 0.13078 | 0.56539 | 0.06562 | 1.000 | 1.000 | 1a | 1 |
| 5  | Co | Co5  | 0.36922 | 0.31539 | 0.06562 | 1.000 | 1.000 | 1a | 1 |
| 6  | Co | Co6  | 0.36922 | 0.81539 | 0.06562 | 1.000 | 1.000 | 1a | 1 |
| 7  | Co | Co7  | 0.50000 | 0.11922 | 0.06562 | 1.000 | 1.000 | 1a | 1 |
| 8  | Co | Co8  | 0.50000 | 0.61922 | 0.06562 | 1.000 | 1.000 | 1a | 1 |
| 9  | Co | Co9  | 0.63078 | 0.31539 | 0.06562 | 1.000 | 1.000 | 1a | 1 |
| 10 | Co | Co10 | 0.63078 | 0.81539 | 0.06562 | 1.000 | 1.000 | 1a | 1 |
| 11 | Co | Co11 | 0.86922 | 0.06539 | 0.06562 | 1.000 | 1.000 | 1a | 1 |
| 12 | Co | Co12 | 0.86922 | 0.56539 | 0.06562 | 1.000 | 1.000 | 1a | 1 |
| 13 | Co | Co13 | 0.99702 | 0.36973 | 0.19681 | 1.000 | 1.000 | 1a | 1 |
| 14 | Co | Co14 | 0.00208 | 0.86826 | 0.19964 | 1.000 | 1.000 | 1a | 1 |
| 15 | Co | Co15 | 0.13104 | 0.06533 | 0.19835 | 1.000 | 1.000 | 1a | 1 |
| 16 | Co | Co16 | 0.13317 | 0.56095 | 0.20142 | 1.000 | 1.000 | 1a | 1 |
| 17 | Co | Co17 | 0.36904 | 0.31867 | 0.19940 | 1.000 | 1.000 | 1a | 1 |
| 18 | Co | Co18 | 0.36833 | 0.81263 | 0.19984 | 1.000 | 1.000 | 1a | 1 |
| 19 | Co | Co19 | 0.49790 | 0.12076 | 0.19863 | 1.000 | 1.000 | 1a | 1 |
| 20 | Co | Co20 | 0.50077 | 0.62011 | 0.19776 | 1.000 | 1.000 | 1a | 1 |
| 21 | Co | Co21 | 0.62815 | 0.31712 | 0.19863 | 1.000 | 1.000 | 1a | 1 |
| 22 | Co | Co22 | 0.63279 | 0.81526 | 0.19766 | 1.000 | 1.000 | 1a | 1 |
| 23 | Co | Co23 | 0.86995 | 0.06503 | 0.19862 | 1.000 | 1.000 | 1a | 1 |
| 24 | Co | Co24 | 0.86934 | 0.56458 | 0.19794 | 1.000 | 1.000 | 1a | 1 |
| 25 | Ni | Ni1  | 0.00000 | 0.19753 | 0.00000 | 1.000 | 1.000 | 1a | 1 |
| 26 | Ni | Ni2  | 0.00000 | 0.69753 | 0.00000 | 1.000 | 1.000 | 1a | 1 |
| 27 | Ni | Ni3  | 0.19753 | 0.40124 | 0.00000 | 1.000 | 1.000 | 1a | 1 |
| 28 | Ni | Ni4  | 0.19753 | 0.90124 | 0.00000 | 1.000 | 1.000 | 1a | 1 |
| 29 | Ni | Ni5  | 0.30247 | 0.15124 | 0.00000 | 1.000 | 1.000 | 1a | 1 |
| 30 | Ni | Ni6  | 0.30247 | 0.65124 | 0.00000 | 1.000 | 1.000 | 1a | 1 |
| 31 | Ni | Ni7  | 0.50000 | 0.44753 | 0.00000 | 1.000 | 1.000 | 1a | 1 |
| 32 | Ni | Ni8  | 0.50000 | 0.94753 | 0.00000 | 1.000 | 1.000 | 1a | 1 |
| 33 | Ni | Ni9  | 0.69753 | 0.15124 | 0.00000 | 1.000 | 1.000 | 1a | 1 |
| 34 | Ni | Ni10 | 0.69753 | 0.65124 | 0.00000 | 1.000 | 1.000 | 1a | 1 |
| 35 | Ni | Ni11 | 0.80247 | 0.40124 | 0.00000 | 1.000 | 1.000 | 1a | 1 |
| 36 | Ni | Ni12 | 0.80247 | 0.90124 | 0.00000 | 1.000 | 1.000 | 1a | 1 |
| 37 | Ni | Ni13 | 0.00000 | 0.19753 | 0.13125 | 1.000 | 1.000 | 1a | 1 |
| 38 | Ni | Ni14 | 0.00000 | 0.69753 | 0.13125 | 1.000 | 1.000 | 1a | 1 |
| 39 | Ni | Ni15 | 0.19753 | 0.40124 | 0.13125 | 1.000 | 1.000 | 1a | 1 |
| 40 | Ni | Ni16 | 0.19753 | 0.90124 | 0.13125 | 1.000 | 1.000 | 1a | 1 |
| 41 | Ni | Ni17 | 0.30247 | 0.15124 | 0.13125 | 1.000 | 1.000 | 1a | 1 |
| 42 | Ni | Ni18 | 0.30247 | 0.65124 | 0.13125 | 1.000 | 1.000 | 1a | 1 |
| 43 | Ni | Ni19 | 0.50000 | 0.44753 | 0.13125 | 1.000 | 1.000 | 1a | 1 |
| 44 | Ni | Ni20 | 0.50000 | 0.94753 | 0.13125 | 1.000 | 1.000 | 1a | 1 |

|       |      |          |         |         |       |       |    |   |
|-------|------|----------|---------|---------|-------|-------|----|---|
| 45 Ni | Ni21 | 0.69753  | 0.15124 | 0.13125 | 1.000 | 1.000 | 1a | 1 |
| 46 Ni | Ni22 | 0.69753  | 0.65124 | 0.13125 | 1.000 | 1.000 | 1a | 1 |
| 47 Ni | Ni23 | 0.80247  | 0.40124 | 0.13125 | 1.000 | 1.000 | 1a | 1 |
| 48 Ni | Ni24 | 0.80247  | 0.90124 | 0.13125 | 1.000 | 1.000 | 1a | 1 |
| 49 Ni | Ni25 | 0.00208  | 0.19603 | 0.26029 | 1.000 | 1.000 | 1a | 1 |
| 50 Ni | Ni26 | 0.99593  | 0.69068 | 0.26096 | 1.000 | 1.000 | 1a | 1 |
| 51 Ni | Ni27 | 0.17514  | 0.38144 | 0.26548 | 1.000 | 1.000 | 1a | 1 |
| 52 Ni | Ni28 | 0.19502  | 0.90465 | 0.26126 | 1.000 | 1.000 | 1a | 1 |
| 53 Ni | Ni29 | 0.30199  | 0.15821 | 0.26095 | 1.000 | 1.000 | 1a | 1 |
| 54 Ni | Ni30 | 0.31884  | 0.64980 | 0.26599 | 1.000 | 1.000 | 1a | 1 |
| 55 Ni | Ni31 | 0.51731  | 0.44754 | 0.26582 | 1.000 | 1.000 | 1a | 1 |
| 56 Ni | Ni32 | 0.50254  | 0.94508 | 0.25994 | 1.000 | 1.000 | 1a | 1 |
| 57 Ni | Ni33 | 0.69349  | 0.15231 | 0.26031 | 1.000 | 1.000 | 1a | 1 |
| 58 Ni | Ni34 | 0.69747  | 0.65192 | 0.25997 | 1.000 | 1.000 | 1a | 1 |
| 59 Ni | Ni35 | 0.80344  | 0.40216 | 0.26036 | 1.000 | 1.000 | 1a | 1 |
| 60 Ni | Ni36 | 0.80502  | 0.90255 | 0.26044 | 1.000 | 1.000 | 1a | 1 |
| 61 P  | P1   | 0.00000  | 0.00000 | 0.00000 | 1.000 | 1.000 | 1a | 1 |
| 62 P  | P2   | 0.00000  | 0.50000 | 0.00000 | 1.000 | 1.000 | 1a | 1 |
| 63 P  | P3   | 0.50000  | 0.25000 | 0.00000 | 1.000 | 1.000 | 1a | 1 |
| 64 P  | P4   | 0.50000  | 0.75000 | 0.00000 | 1.000 | 1.000 | 1a | 1 |
| 65 P  | P5   | 0.16667  | 0.25000 | 0.06562 | 1.000 | 1.000 | 1a | 1 |
| 66 P  | P6   | 0.16667  | 0.75000 | 0.06562 | 1.000 | 1.000 | 1a | 1 |
| 67 P  | P7   | 0.33333  | 0.00000 | 0.06562 | 1.000 | 1.000 | 1a | 1 |
| 68 P  | P8   | 0.33333  | 0.50000 | 0.06562 | 1.000 | 1.000 | 1a | 1 |
| 69 P  | P9   | 0.66667  | 0.00000 | 0.06562 | 1.000 | 1.000 | 1a | 1 |
| 70 P  | P10  | 0.66667  | 0.50000 | 0.06562 | 1.000 | 1.000 | 1a | 1 |
| 71 P  | P11  | 0.83333  | 0.25000 | 0.06562 | 1.000 | 1.000 | 1a | 1 |
| 72 P  | P12  | 0.83333  | 0.75000 | 0.06562 | 1.000 | 1.000 | 1a | 1 |
| 73 P  | P13  | 0.00000  | 0.00000 | 0.13125 | 1.000 | 1.000 | 1a | 1 |
| 74 P  | P14  | 0.00000  | 0.50000 | 0.13125 | 1.000 | 1.000 | 1a | 1 |
| 75 P  | P15  | 0.50000  | 0.25000 | 0.13125 | 1.000 | 1.000 | 1a | 1 |
| 76 P  | P16  | 0.50000  | 0.75000 | 0.13125 | 1.000 | 1.000 | 1a | 1 |
| 77 P  | P17  | 0.16596  | 0.25027 | 0.19810 | 1.000 | 1.000 | 1a | 1 |
| 78 P  | P18  | 0.16842  | 0.74611 | 0.20475 | 1.000 | 1.000 | 1a | 1 |
| 79 P  | P19  | 0.33305  | 0.99952 | 0.20200 | 1.000 | 1.000 | 1a | 1 |
| 80 P  | P20  | 0.33472  | 0.50129 | 0.19804 | 1.000 | 1.000 | 1a | 1 |
| 81 P  | P21  | 0.66656  | 0.00109 | 0.20074 | 1.000 | 1.000 | 1a | 1 |
| 82 P  | P22  | 0.66715  | 0.50035 | 0.19972 | 1.000 | 1.000 | 1a | 1 |
| 83 P  | P23  | 0.83092  | 0.24953 | 0.20107 | 1.000 | 1.000 | 1a | 1 |
| 84 P  | P24  | 0.83497  | 0.75014 | 0.20013 | 1.000 | 1.000 | 1a | 1 |
| 85 P  | P25  | -0.00031 | 1.00025 | 0.26705 | 1.000 | 1.000 | 1a | 1 |
| 86 P  | P26  | 0.99804  | 0.49427 | 0.26774 | 1.000 | 1.000 | 1a | 1 |
| 87 P  | P27  | 0.50083  | 0.25104 | 0.26664 | 1.000 | 1.000 | 1a | 1 |
| 88 P  | P28  | 0.50721  | 0.75333 | 0.26647 | 1.000 | 1.000 | 1a | 1 |

|    |   |    |         |         |         |       |       |    |   |
|----|---|----|---------|---------|---------|-------|-------|----|---|
| 89 | O | O1 | 0.39336 | 0.52511 | 0.31592 | 1.000 | 1.000 | 1a | 1 |
| 90 | H | H1 | 0.42954 | 0.55017 | 0.35037 | 1.000 | 1.000 | 1a | 1 |
| 91 | H | H2 | 0.25995 | 0.41016 | 0.31368 | 1.000 | 1.000 | 1a | 1 |

=====  
 ===

### CoP H\*+OH\*

=====  
 ===

Title CoP(2\0\0)

Lattice type P  
 Space group name P 1  
 Space group number 1  
 Setting number 1

#### Lattice parameters

| a        | b        | c        | alpha   | beta    | gamma   |
|----------|----------|----------|---------|---------|---------|
| 10.05150 | 11.00530 | 25.00000 | 90.0000 | 90.0000 | 90.0000 |

Unit-cell volume = 2765.494303 Å<sup>3</sup>

#### Structure parameters

|    |    | x    | y       | z       | Occ.    | U     | Site  | Sym. |   |
|----|----|------|---------|---------|---------|-------|-------|------|---|
| 1  | Co | Co1  | 0.24946 | 0.34874 | 0.00000 | 1.000 | 1.000 | 1a   | 1 |
| 2  | Co | Co2  | 0.24946 | 0.84874 | 0.00000 | 1.000 | 1.000 | 1a   | 1 |
| 3  | Co | Co3  | 0.49946 | 0.40126 | 0.00000 | 1.000 | 1.000 | 1a   | 1 |
| 4  | Co | Co4  | 0.49946 | 0.90126 | 0.00000 | 1.000 | 1.000 | 1a   | 1 |
| 5  | Co | Co5  | 0.74946 | 0.34874 | 0.00000 | 1.000 | 1.000 | 1a   | 1 |
| 6  | Co | Co6  | 0.74946 | 0.84874 | 0.00000 | 1.000 | 1.000 | 1a   | 1 |
| 7  | Co | Co7  | 0.99946 | 0.40126 | 0.00000 | 1.000 | 1.000 | 1a   | 1 |
| 8  | Co | Co8  | 0.99946 | 0.90126 | 0.00000 | 1.000 | 1.000 | 1a   | 1 |
| 9  | Co | Co9  | 0.00054 | 0.09874 | 0.06562 | 1.000 | 1.000 | 1a   | 1 |
| 10 | Co | Co10 | 0.00054 | 0.59874 | 0.06562 | 1.000 | 1.000 | 1a   | 1 |
| 11 | Co | Co11 | 0.25054 | 0.15126 | 0.06562 | 1.000 | 1.000 | 1a   | 1 |
| 12 | Co | Co12 | 0.25054 | 0.65126 | 0.06562 | 1.000 | 1.000 | 1a   | 1 |
| 13 | Co | Co13 | 0.50054 | 0.09874 | 0.06562 | 1.000 | 1.000 | 1a   | 1 |
| 14 | Co | Co14 | 0.50054 | 0.59874 | 0.06562 | 1.000 | 1.000 | 1a   | 1 |
| 15 | Co | Co15 | 0.75054 | 0.15126 | 0.06562 | 1.000 | 1.000 | 1a   | 1 |
| 16 | Co | Co16 | 0.75054 | 0.65126 | 0.06562 | 1.000 | 1.000 | 1a   | 1 |



|       |      |         |         |         |       |       |    |   |
|-------|------|---------|---------|---------|-------|-------|----|---|
| 17 Co | Co17 | 0.24946 | 0.34874 | 0.13125 | 1.000 | 1.000 | 1a | 1 |
| 18 Co | Co18 | 0.24946 | 0.84874 | 0.13125 | 1.000 | 1.000 | 1a | 1 |
| 19 Co | Co19 | 0.49946 | 0.40126 | 0.13125 | 1.000 | 1.000 | 1a | 1 |
| 20 Co | Co20 | 0.49946 | 0.90126 | 0.13125 | 1.000 | 1.000 | 1a | 1 |
| 21 Co | Co21 | 0.74946 | 0.34874 | 0.13125 | 1.000 | 1.000 | 1a | 1 |
| 22 Co | Co22 | 0.74946 | 0.84874 | 0.13125 | 1.000 | 1.000 | 1a | 1 |
| 23 Co | Co23 | 0.99946 | 0.40126 | 0.13125 | 1.000 | 1.000 | 1a | 1 |
| 24 Co | Co24 | 0.99946 | 0.90126 | 0.13125 | 1.000 | 1.000 | 1a | 1 |
| 25 Co | Co25 | 0.99782 | 0.10244 | 0.19589 | 1.000 | 1.000 | 1a | 1 |
| 26 Co | Co26 | 0.99782 | 0.60244 | 0.19589 | 1.000 | 1.000 | 1a | 1 |
| 27 Co | Co27 | 0.24781 | 0.14756 | 0.19589 | 1.000 | 1.000 | 1a | 1 |
| 28 Co | Co28 | 0.24781 | 0.64756 | 0.19589 | 1.000 | 1.000 | 1a | 1 |
| 29 Co | Co29 | 0.49782 | 0.10244 | 0.19589 | 1.000 | 1.000 | 1a | 1 |
| 30 Co | Co30 | 0.49782 | 0.60244 | 0.19589 | 1.000 | 1.000 | 1a | 1 |
| 31 Co | Co31 | 0.74782 | 0.14756 | 0.19589 | 1.000 | 1.000 | 1a | 1 |
| 32 Co | Co32 | 0.74782 | 0.64756 | 0.19589 | 1.000 | 1.000 | 1a | 1 |
| 33 Co | Co33 | 0.24861 | 0.35000 | 0.25330 | 1.000 | 1.000 | 1a | 1 |
| 34 Co | Co34 | 0.25242 | 0.84801 | 0.25053 | 1.000 | 1.000 | 1a | 1 |
| 35 Co | Co35 | 0.50603 | 0.39799 | 0.25657 | 1.000 | 1.000 | 1a | 1 |
| 36 Co | Co36 | 0.50127 | 0.90353 | 0.25046 | 1.000 | 1.000 | 1a | 1 |
| 37 Co | Co37 | 0.74810 | 0.35050 | 0.25531 | 1.000 | 1.000 | 1a | 1 |
| 38 Co | Co38 | 0.75152 | 0.84751 | 0.25062 | 1.000 | 1.000 | 1a | 1 |
| 39 Co | Co39 | 0.00710 | 0.40092 | 0.25343 | 1.000 | 1.000 | 1a | 1 |
| 40 Co | Co40 | 0.00140 | 0.90328 | 0.25028 | 1.000 | 1.000 | 1a | 1 |
| 41 P  | P1   | 0.09583 | 0.20919 | 0.00000 | 1.000 | 1.000 | 1a | 1 |
| 42 P  | P2   | 0.09583 | 0.70919 | 0.00000 | 1.000 | 1.000 | 1a | 1 |
| 43 P  | P3   | 0.34583 | 0.04081 | 0.00000 | 1.000 | 1.000 | 1a | 1 |
| 44 P  | P4   | 0.34583 | 0.54081 | 0.00000 | 1.000 | 1.000 | 1a | 1 |
| 45 P  | P5   | 0.59583 | 0.20919 | 0.00000 | 1.000 | 1.000 | 1a | 1 |
| 46 P  | P6   | 0.59583 | 0.70919 | 0.00000 | 1.000 | 1.000 | 1a | 1 |
| 47 P  | P7   | 0.84583 | 0.04081 | 0.00000 | 1.000 | 1.000 | 1a | 1 |
| 48 P  | P8   | 0.84583 | 0.54081 | 0.00000 | 1.000 | 1.000 | 1a | 1 |
| 49 P  | P9   | 0.15417 | 0.45919 | 0.06562 | 1.000 | 1.000 | 1a | 1 |
| 50 P  | P10  | 0.15417 | 0.95919 | 0.06562 | 1.000 | 1.000 | 1a | 1 |
| 51 P  | P11  | 0.40417 | 0.29081 | 0.06562 | 1.000 | 1.000 | 1a | 1 |
| 52 P  | P12  | 0.40417 | 0.79081 | 0.06562 | 1.000 | 1.000 | 1a | 1 |
| 53 P  | P13  | 0.65417 | 0.45919 | 0.06562 | 1.000 | 1.000 | 1a | 1 |
| 54 P  | P14  | 0.65417 | 0.95919 | 0.06562 | 1.000 | 1.000 | 1a | 1 |
| 55 P  | P15  | 0.90417 | 0.29081 | 0.06562 | 1.000 | 1.000 | 1a | 1 |
| 56 P  | P16  | 0.90417 | 0.79081 | 0.06562 | 1.000 | 1.000 | 1a | 1 |
| 57 P  | P17  | 0.09583 | 0.20919 | 0.13125 | 1.000 | 1.000 | 1a | 1 |
| 58 P  | P18  | 0.09583 | 0.70919 | 0.13125 | 1.000 | 1.000 | 1a | 1 |
| 59 P  | P19  | 0.34583 | 0.04081 | 0.13125 | 1.000 | 1.000 | 1a | 1 |
| 60 P  | P20  | 0.34583 | 0.54081 | 0.13125 | 1.000 | 1.000 | 1a | 1 |

|      |     |         |         |         |       |       |    |   |
|------|-----|---------|---------|---------|-------|-------|----|---|
| 61 P | P21 | 0.59583 | 0.20919 | 0.13125 | 1.000 | 1.000 | 1a | 1 |
| 62 P | P22 | 0.59583 | 0.70919 | 0.13125 | 1.000 | 1.000 | 1a | 1 |
| 63 P | P23 | 0.84583 | 0.04081 | 0.13125 | 1.000 | 1.000 | 1a | 1 |
| 64 P | P24 | 0.84583 | 0.54081 | 0.13125 | 1.000 | 1.000 | 1a | 1 |
| 65 P | P25 | 0.15513 | 0.46395 | 0.19702 | 1.000 | 1.000 | 1a | 1 |
| 66 P | P26 | 0.15513 | 0.96395 | 0.19702 | 1.000 | 1.000 | 1a | 1 |
| 67 P | P27 | 0.40513 | 0.28605 | 0.19702 | 1.000 | 1.000 | 1a | 1 |
| 68 P | P28 | 0.40513 | 0.78605 | 0.19702 | 1.000 | 1.000 | 1a | 1 |
| 69 P | P29 | 0.65513 | 0.46395 | 0.19702 | 1.000 | 1.000 | 1a | 1 |
| 70 P | P30 | 0.65513 | 0.96395 | 0.19702 | 1.000 | 1.000 | 1a | 1 |
| 71 P | P31 | 0.90513 | 0.28605 | 0.19702 | 1.000 | 1.000 | 1a | 1 |
| 72 P | P32 | 0.90513 | 0.78605 | 0.19702 | 1.000 | 1.000 | 1a | 1 |
| 73 P | P33 | 0.08836 | 0.21257 | 0.26482 | 1.000 | 1.000 | 1a | 1 |
| 74 P | P34 | 0.08964 | 0.72281 | 0.26597 | 1.000 | 1.000 | 1a | 1 |
| 75 P | P35 | 0.33814 | 0.02877 | 0.26627 | 1.000 | 1.000 | 1a | 1 |
| 76 P | P36 | 0.34800 | 0.53411 | 0.26648 | 1.000 | 1.000 | 1a | 1 |
| 77 P | P37 | 0.58878 | 0.20597 | 0.26356 | 1.000 | 1.000 | 1a | 1 |
| 78 P | P38 | 0.58754 | 0.72271 | 0.26621 | 1.000 | 1.000 | 1a | 1 |
| 79 P | P39 | 0.83827 | 0.02857 | 0.26601 | 1.000 | 1.000 | 1a | 1 |
| 80 P | P40 | 0.85494 | 0.53798 | 0.26401 | 1.000 | 1.000 | 1a | 1 |
| 81 O | O1  | 0.63395 | 0.41851 | 0.31398 | 1.000 | 1.000 | 1a | 1 |
| 82 H | H1  | 0.65852 | 0.50327 | 0.32201 | 1.000 | 1.000 | 1a | 1 |
| 83 H | H2  | 0.14547 | 0.41837 | 0.29285 | 1.000 | 1.000 | 1a | 1 |

=====  
 ===

### NiCoP-CoP H\*+OH\*

=====  
 ===

Title                   opt-Test

Lattice type            P

Space group name      P 1

Space group number    1

Setting number         1

Lattice parameters

| a        | b        | c        | alpha   | beta    | gamma   |
|----------|----------|----------|---------|---------|---------|
| 20.00560 | 11.24700 | 25.00000 | 90.0000 | 90.0000 | 90.0000 |

Unit-cell volume = 5625.074443 Å<sup>3</sup>

Structure parameters

|    |         | x       | y       | z       | Occ.  | U     | Site | Sym. |
|----|---------|---------|---------|---------|-------|-------|------|------|
| 1  | Co Co1  | 0.00675 | 0.40905 | 0.00000 | 1.000 | 1.000 | 1a   | 1    |
| 2  | Co Co2  | 0.00675 | 0.90905 | 0.00000 | 1.000 | 1.000 | 1a   | 1    |
| 3  | Co Co3  | 0.12814 | 0.34862 | 0.00000 | 1.000 | 1.000 | 1a   | 1    |
| 4  | Co Co4  | 0.12814 | 0.84862 | 0.00000 | 1.000 | 1.000 | 1a   | 1    |
| 5  | Co Co5  | 0.25523 | 0.39733 | 0.00000 | 1.000 | 1.000 | 1a   | 1    |
| 6  | Co Co6  | 0.25523 | 0.89733 | 0.00000 | 1.000 | 1.000 | 1a   | 1    |
| 7  | Co Co7  | 0.38277 | 0.35161 | 0.00000 | 1.000 | 1.000 | 1a   | 1    |
| 8  | Co Co8  | 0.38277 | 0.85161 | 0.00000 | 1.000 | 1.000 | 1a   | 1    |
| 9  | Co Co9  | 0.01686 | 0.09208 | 0.06562 | 1.000 | 1.000 | 1a   | 1    |
| 10 | Co Co10 | 0.01686 | 0.59208 | 0.06562 | 1.000 | 1.000 | 1a   | 1    |
| 11 | Co Co11 | 0.13517 | 0.14703 | 0.06562 | 1.000 | 1.000 | 1a   | 1    |
| 12 | Co Co12 | 0.13517 | 0.64703 | 0.06562 | 1.000 | 1.000 | 1a   | 1    |
| 13 | Co Co13 | 0.25705 | 0.10125 | 0.06562 | 1.000 | 1.000 | 1a   | 1    |
| 14 | Co Co14 | 0.25705 | 0.60125 | 0.06562 | 1.000 | 1.000 | 1a   | 1    |
| 15 | Co Co15 | 0.37959 | 0.14467 | 0.06562 | 1.000 | 1.000 | 1a   | 1    |
| 16 | Co Co16 | 0.37959 | 0.64467 | 0.06562 | 1.000 | 1.000 | 1a   | 1    |
| 17 | Co Co17 | 0.50387 | 0.08464 | 0.06562 | 1.000 | 1.000 | 1a   | 1    |
| 18 | Co Co18 | 0.50387 | 0.58464 | 0.06562 | 1.000 | 1.000 | 1a   | 1    |
| 19 | Co Co19 | 0.58720 | 0.27888 | 0.06562 | 1.000 | 1.000 | 1a   | 1    |
| 20 | Co Co20 | 0.58720 | 0.77888 | 0.06562 | 1.000 | 1.000 | 1a   | 1    |
| 21 | Co Co21 | 0.70394 | 0.02381 | 0.06562 | 1.000 | 1.000 | 1a   | 1    |
| 22 | Co Co22 | 0.70394 | 0.52381 | 0.06562 | 1.000 | 1.000 | 1a   | 1    |
| 23 | Co Co23 | 0.77258 | 0.32820 | 0.06562 | 1.000 | 1.000 | 1a   | 1    |
| 24 | Co Co24 | 0.77258 | 0.82820 | 0.06562 | 1.000 | 1.000 | 1a   | 1    |
| 25 | Co Co25 | 0.83653 | 0.02678 | 0.06562 | 1.000 | 1.000 | 1a   | 1    |
| 26 | Co Co26 | 0.83653 | 0.52678 | 0.06562 | 1.000 | 1.000 | 1a   | 1    |
| 27 | Co Co27 | 0.95638 | 0.27536 | 0.06562 | 1.000 | 1.000 | 1a   | 1    |
| 28 | Co Co28 | 0.95638 | 0.77536 | 0.06562 | 1.000 | 1.000 | 1a   | 1    |
| 29 | Co Co29 | 0.01381 | 0.40341 | 0.13125 | 1.000 | 1.000 | 1a   | 1    |
| 30 | Co Co30 | 0.01381 | 0.90341 | 0.13125 | 1.000 | 1.000 | 1a   | 1    |
| 31 | Co Co31 | 0.13239 | 0.34729 | 0.13125 | 1.000 | 1.000 | 1a   | 1    |
| 32 | Co Co32 | 0.13239 | 0.84729 | 0.13125 | 1.000 | 1.000 | 1a   | 1    |
| 33 | Co Co33 | 0.25310 | 0.39909 | 0.13125 | 1.000 | 1.000 | 1a   | 1    |
| 34 | Co Co34 | 0.25310 | 0.89909 | 0.13125 | 1.000 | 1.000 | 1a   | 1    |
| 35 | Co Co35 | 0.37623 | 0.35070 | 0.13125 | 1.000 | 1.000 | 1a   | 1    |
| 36 | Co Co36 | 0.37623 | 0.85070 | 0.13125 | 1.000 | 1.000 | 1a   | 1    |
| 37 | Co Co37 | 0.01475 | 0.09492 | 0.19657 | 1.000 | 1.000 | 1a   | 1    |
| 38 | Co Co38 | 0.01514 | 0.59573 | 0.19689 | 1.000 | 1.000 | 1a   | 1    |
| 39 | Co Co39 | 0.13303 | 0.14032 | 0.19691 | 1.000 | 1.000 | 1a   | 1    |
| 40 | Co Co40 | 0.13328 | 0.64000 | 0.19688 | 1.000 | 1.000 | 1a   | 1    |
| 41 | Co Co41 | 0.25541 | 0.10321 | 0.19853 | 1.000 | 1.000 | 1a   | 1    |

|       |      |         |         |         |       |       |    |   |
|-------|------|---------|---------|---------|-------|-------|----|---|
| 42 Co | Co42 | 0.25551 | 0.60234 | 0.19849 | 1.000 | 1.000 | 1a | 1 |
| 43 Co | Co43 | 0.37816 | 0.14697 | 0.19770 | 1.000 | 1.000 | 1a | 1 |
| 44 Co | Co44 | 0.37791 | 0.64497 | 0.19815 | 1.000 | 1.000 | 1a | 1 |
| 45 Co | Co45 | 0.50360 | 0.09406 | 0.20043 | 1.000 | 1.000 | 1a | 1 |
| 46 Co | Co46 | 0.50329 | 0.59198 | 0.20045 | 1.000 | 1.000 | 1a | 1 |
| 47 Co | Co47 | 0.58639 | 0.27477 | 0.19938 | 1.000 | 1.000 | 1a | 1 |
| 48 Co | Co48 | 0.58456 | 0.77349 | 0.20161 | 1.000 | 1.000 | 1a | 1 |
| 49 Co | Co49 | 0.70305 | 0.02152 | 0.19767 | 1.000 | 1.000 | 1a | 1 |
| 50 Co | Co50 | 0.70158 | 0.51720 | 0.20063 | 1.000 | 1.000 | 1a | 1 |
| 51 Co | Co51 | 0.77140 | 0.32938 | 0.19819 | 1.000 | 1.000 | 1a | 1 |
| 52 Co | Co52 | 0.76994 | 0.82815 | 0.19855 | 1.000 | 1.000 | 1a | 1 |
| 53 Co | Co53 | 0.83266 | 0.02809 | 0.20171 | 1.000 | 1.000 | 1a | 1 |
| 54 Co | Co54 | 0.83365 | 0.52648 | 0.19967 | 1.000 | 1.000 | 1a | 1 |
| 55 Co | Co55 | 0.95566 | 0.28059 | 0.19777 | 1.000 | 1.000 | 1a | 1 |
| 56 Co | Co56 | 0.95475 | 0.78094 | 0.19808 | 1.000 | 1.000 | 1a | 1 |
| 57 Co | Co57 | 0.00803 | 0.41578 | 0.26113 | 1.000 | 1.000 | 1a | 1 |
| 58 Co | Co58 | 0.00803 | 0.91652 | 0.26109 | 1.000 | 1.000 | 1a | 1 |
| 59 Co | Co59 | 0.12767 | 0.33996 | 0.25408 | 1.000 | 1.000 | 1a | 1 |
| 60 Co | Co60 | 0.12767 | 0.83971 | 0.25370 | 1.000 | 1.000 | 1a | 1 |
| 61 Co | Co61 | 0.25511 | 0.39846 | 0.25073 | 1.000 | 1.000 | 1a | 1 |
| 62 Co | Co62 | 0.25484 | 0.89846 | 0.25025 | 1.000 | 1.000 | 1a | 1 |
| 63 Co | Co63 | 0.38222 | 0.35132 | 0.25385 | 1.000 | 1.000 | 1a | 1 |
| 64 Co | Co64 | 0.38080 | 0.85125 | 0.25338 | 1.000 | 1.000 | 1a | 1 |
| 65 Ni | Ni1  | 0.51052 | 0.40283 | 0.00000 | 1.000 | 1.000 | 1a | 1 |
| 66 Ni | Ni2  | 0.51052 | 0.90283 | 0.00000 | 1.000 | 1.000 | 1a | 1 |
| 67 Ni | Ni3  | 0.62146 | 0.10806 | 0.00000 | 1.000 | 1.000 | 1a | 1 |
| 68 Ni | Ni4  | 0.62146 | 0.60806 | 0.00000 | 1.000 | 1.000 | 1a | 1 |
| 69 Ni | Ni5  | 0.67694 | 0.35784 | 0.00000 | 1.000 | 1.000 | 1a | 1 |
| 70 Ni | Ni6  | 0.67694 | 0.85784 | 0.00000 | 1.000 | 1.000 | 1a | 1 |
| 71 Ni | Ni7  | 0.76923 | 0.15455 | 0.00000 | 1.000 | 1.000 | 1a | 1 |
| 72 Ni | Ni8  | 0.76923 | 0.65455 | 0.00000 | 1.000 | 1.000 | 1a | 1 |
| 73 Ni | Ni9  | 0.86953 | 0.35916 | 0.00000 | 1.000 | 1.000 | 1a | 1 |
| 74 Ni | Ni10 | 0.86953 | 0.85916 | 0.00000 | 1.000 | 1.000 | 1a | 1 |
| 75 Ni | Ni11 | 0.93046 | 0.11273 | 0.00000 | 1.000 | 1.000 | 1a | 1 |
| 76 Ni | Ni12 | 0.93046 | 0.61273 | 0.00000 | 1.000 | 1.000 | 1a | 1 |
| 77 Ni | Ni13 | 0.50670 | 0.39909 | 0.13125 | 1.000 | 1.000 | 1a | 1 |
| 78 Ni | Ni14 | 0.50670 | 0.89909 | 0.13125 | 1.000 | 1.000 | 1a | 1 |
| 79 Ni | Ni15 | 0.62370 | 0.10922 | 0.13125 | 1.000 | 1.000 | 1a | 1 |
| 80 Ni | Ni16 | 0.62370 | 0.60922 | 0.13125 | 1.000 | 1.000 | 1a | 1 |
| 81 Ni | Ni17 | 0.67014 | 0.36192 | 0.13125 | 1.000 | 1.000 | 1a | 1 |
| 82 Ni | Ni18 | 0.67014 | 0.86192 | 0.13125 | 1.000 | 1.000 | 1a | 1 |
| 83 Ni | Ni19 | 0.77115 | 0.15432 | 0.13125 | 1.000 | 1.000 | 1a | 1 |
| 84 Ni | Ni20 | 0.77115 | 0.65432 | 0.13125 | 1.000 | 1.000 | 1a | 1 |
| 85 Ni | Ni21 | 0.87340 | 0.36151 | 0.13125 | 1.000 | 1.000 | 1a | 1 |

|        |      |         |         |         |       |       |    |   |
|--------|------|---------|---------|---------|-------|-------|----|---|
| 86 Ni  | Ni22 | 0.87340 | 0.86151 | 0.13125 | 1.000 | 1.000 | 1a | 1 |
| 87 Ni  | Ni23 | 0.91952 | 0.11549 | 0.13125 | 1.000 | 1.000 | 1a | 1 |
| 88 Ni  | Ni24 | 0.91952 | 0.61549 | 0.13125 | 1.000 | 1.000 | 1a | 1 |
| 89 Ni  | Ni25 | 0.51086 | 0.39603 | 0.25653 | 1.000 | 1.000 | 1a | 1 |
| 90 Ni  | Ni26 | 0.50571 | 0.89958 | 0.25211 | 1.000 | 1.000 | 1a | 1 |
| 91 Ni  | Ni27 | 0.64159 | 0.12360 | 0.27156 | 1.000 | 1.000 | 1a | 1 |
| 92 Ni  | Ni28 | 0.62123 | 0.60790 | 0.26657 | 1.000 | 1.000 | 1a | 1 |
| 93 Ni  | Ni29 | 0.67856 | 0.34496 | 0.27012 | 1.000 | 1.000 | 1a | 1 |
| 94 Ni  | Ni30 | 0.67183 | 0.86517 | 0.26239 | 1.000 | 1.000 | 1a | 1 |
| 95 Ni  | Ni31 | 0.76767 | 0.15972 | 0.26635 | 1.000 | 1.000 | 1a | 1 |
| 96 Ni  | Ni32 | 0.77026 | 0.65417 | 0.26302 | 1.000 | 1.000 | 1a | 1 |
| 97 Ni  | Ni33 | 0.87002 | 0.36418 | 0.26202 | 1.000 | 1.000 | 1a | 1 |
| 98 Ni  | Ni34 | 0.86742 | 0.86145 | 0.26264 | 1.000 | 1.000 | 1a | 1 |
| 99 Ni  | Ni35 | 0.92732 | 0.12267 | 0.26347 | 1.000 | 1.000 | 1a | 1 |
| 100 Ni | Ni36 | 0.92636 | 0.62161 | 0.26323 | 1.000 | 1.000 | 1a | 1 |
| 101 P  | P1   | 0.03409 | 0.21848 | 0.00000 | 1.000 | 1.000 | 1a | 1 |
| 102 P  | P2   | 0.03409 | 0.71848 | 0.00000 | 1.000 | 1.000 | 1a | 1 |
| 103 P  | P3   | 0.17390 | 0.02890 | 0.00000 | 1.000 | 1.000 | 1a | 1 |
| 104 P  | P4   | 0.17390 | 0.52890 | 0.00000 | 1.000 | 1.000 | 1a | 1 |
| 105 P  | P5   | 0.29813 | 0.21916 | 0.00000 | 1.000 | 1.000 | 1a | 1 |
| 106 P  | P6   | 0.29813 | 0.71916 | 0.00000 | 1.000 | 1.000 | 1a | 1 |
| 107 P  | P7   | 0.42362 | 0.03145 | 0.00000 | 1.000 | 1.000 | 1a | 1 |
| 108 P  | P8   | 0.42362 | 0.53145 | 0.00000 | 1.000 | 1.000 | 1a | 1 |
| 109 P  | P9   | 0.52912 | 0.20886 | 0.00000 | 1.000 | 1.000 | 1a | 1 |
| 110 P  | P10  | 0.52912 | 0.70886 | 0.00000 | 1.000 | 1.000 | 1a | 1 |
| 111 P  | P11  | 0.77143 | 0.45725 | 0.00000 | 1.000 | 1.000 | 1a | 1 |
| 112 P  | P12  | 0.77143 | 0.95725 | 0.00000 | 1.000 | 1.000 | 1a | 1 |
| 113 P  | P13  | 0.08693 | 0.45321 | 0.06562 | 1.000 | 1.000 | 1a | 1 |
| 114 P  | P14  | 0.08693 | 0.95321 | 0.06562 | 1.000 | 1.000 | 1a | 1 |
| 115 P  | P15  | 0.20538 | 0.29402 | 0.06562 | 1.000 | 1.000 | 1a | 1 |
| 116 P  | P16  | 0.20538 | 0.79402 | 0.06562 | 1.000 | 1.000 | 1a | 1 |
| 117 P  | P17  | 0.32908 | 0.45438 | 0.06562 | 1.000 | 1.000 | 1a | 1 |
| 118 P  | P18  | 0.32908 | 0.95438 | 0.06562 | 1.000 | 1.000 | 1a | 1 |
| 119 P  | P19  | 0.44768 | 0.29725 | 0.06562 | 1.000 | 1.000 | 1a | 1 |
| 120 P  | P20  | 0.44768 | 0.79725 | 0.06562 | 1.000 | 1.000 | 1a | 1 |
| 121 P  | P21  | 0.59766 | 0.46715 | 0.06562 | 1.000 | 1.000 | 1a | 1 |
| 122 P  | P22  | 0.59766 | 0.96715 | 0.06562 | 1.000 | 1.000 | 1a | 1 |
| 123 P  | P23  | 0.68981 | 0.21162 | 0.06562 | 1.000 | 1.000 | 1a | 1 |
| 124 P  | P24  | 0.68981 | 0.71162 | 0.06562 | 1.000 | 1.000 | 1a | 1 |
| 125 P  | P25  | 0.85529 | 0.21141 | 0.06562 | 1.000 | 1.000 | 1a | 1 |
| 126 P  | P26  | 0.85529 | 0.71141 | 0.06562 | 1.000 | 1.000 | 1a | 1 |
| 127 P  | P27  | 0.93738 | 0.46256 | 0.06562 | 1.000 | 1.000 | 1a | 1 |
| 128 P  | P28  | 0.93738 | 0.96256 | 0.06562 | 1.000 | 1.000 | 1a | 1 |
| 129 P  | P29  | 0.03746 | 0.21394 | 0.13125 | 1.000 | 1.000 | 1a | 1 |

|       |     |         |         |         |       |       |    |   |
|-------|-----|---------|---------|---------|-------|-------|----|---|
| 130 P | P30 | 0.03746 | 0.71394 | 0.13125 | 1.000 | 1.000 | 1a | 1 |
| 131 P | P31 | 0.17801 | 0.04371 | 0.13125 | 1.000 | 1.000 | 1a | 1 |
| 132 P | P32 | 0.17801 | 0.54371 | 0.13125 | 1.000 | 1.000 | 1a | 1 |
| 133 P | P33 | 0.30152 | 0.20524 | 0.13125 | 1.000 | 1.000 | 1a | 1 |
| 134 P | P34 | 0.30152 | 0.70524 | 0.13125 | 1.000 | 1.000 | 1a | 1 |
| 135 P | P35 | 0.42559 | 0.04086 | 0.13125 | 1.000 | 1.000 | 1a | 1 |
| 136 P | P36 | 0.42559 | 0.54086 | 0.13125 | 1.000 | 1.000 | 1a | 1 |
| 137 P | P37 | 0.53204 | 0.20422 | 0.13125 | 1.000 | 1.000 | 1a | 1 |
| 138 P | P38 | 0.53204 | 0.70422 | 0.13125 | 1.000 | 1.000 | 1a | 1 |
| 139 P | P39 | 0.77155 | 0.45710 | 0.13125 | 1.000 | 1.000 | 1a | 1 |
| 140 P | P40 | 0.77155 | 0.95710 | 0.13125 | 1.000 | 1.000 | 1a | 1 |
| 141 P | P41 | 0.08574 | 0.45725 | 0.19774 | 1.000 | 1.000 | 1a | 1 |
| 142 P | P42 | 0.08556 | 0.95732 | 0.19764 | 1.000 | 1.000 | 1a | 1 |
| 143 P | P43 | 0.20531 | 0.28366 | 0.19700 | 1.000 | 1.000 | 1a | 1 |
| 144 P | P44 | 0.20548 | 0.78310 | 0.19671 | 1.000 | 1.000 | 1a | 1 |
| 145 P | P45 | 0.33200 | 0.46270 | 0.19811 | 1.000 | 1.000 | 1a | 1 |
| 146 P | P46 | 0.33214 | 0.96439 | 0.19801 | 1.000 | 1.000 | 1a | 1 |
| 147 P | P47 | 0.45517 | 0.28460 | 0.20036 | 1.000 | 1.000 | 1a | 1 |
| 148 P | P48 | 0.45255 | 0.78382 | 0.19816 | 1.000 | 1.000 | 1a | 1 |
| 149 P | P49 | 0.59626 | 0.46662 | 0.19929 | 1.000 | 1.000 | 1a | 1 |
| 150 P | P50 | 0.59772 | 0.97226 | 0.21105 | 1.000 | 1.000 | 1a | 1 |
| 151 P | P51 | 0.68950 | 0.21040 | 0.19814 | 1.000 | 1.000 | 1a | 1 |
| 152 P | P52 | 0.68736 | 0.70783 | 0.20502 | 1.000 | 1.000 | 1a | 1 |
| 153 P | P53 | 0.85548 | 0.21216 | 0.20333 | 1.000 | 1.000 | 1a | 1 |
| 154 P | P54 | 0.85475 | 0.71202 | 0.20276 | 1.000 | 1.000 | 1a | 1 |
| 155 P | P55 | 0.93458 | 0.46766 | 0.20055 | 1.000 | 1.000 | 1a | 1 |
| 156 P | P56 | 0.93356 | 0.96759 | 0.20127 | 1.000 | 1.000 | 1a | 1 |
| 157 P | P57 | 0.02968 | 0.22415 | 0.26238 | 1.000 | 1.000 | 1a | 1 |
| 158 P | P58 | 0.02856 | 0.72477 | 0.26259 | 1.000 | 1.000 | 1a | 1 |
| 159 P | P59 | 0.17238 | 0.02151 | 0.26331 | 1.000 | 1.000 | 1a | 1 |
| 160 P | P60 | 0.17263 | 0.52208 | 0.26354 | 1.000 | 1.000 | 1a | 1 |
| 161 P | P61 | 0.30009 | 0.22261 | 0.26529 | 1.000 | 1.000 | 1a | 1 |
| 162 P | P62 | 0.29916 | 0.72234 | 0.26519 | 1.000 | 1.000 | 1a | 1 |
| 163 P | P63 | 0.42398 | 0.03235 | 0.26699 | 1.000 | 1.000 | 1a | 1 |
| 164 P | P64 | 0.42642 | 0.53097 | 0.26734 | 1.000 | 1.000 | 1a | 1 |
| 165 P | P65 | 0.54220 | 0.20358 | 0.27514 | 1.000 | 1.000 | 1a | 1 |
| 166 P | P66 | 0.53140 | 0.71112 | 0.27670 | 1.000 | 1.000 | 1a | 1 |
| 167 P | P67 | 0.77137 | 0.45604 | 0.26878 | 1.000 | 1.000 | 1a | 1 |
| 168 P | P68 | 0.76909 | 0.95982 | 0.26937 | 1.000 | 1.000 | 1a | 1 |
| 169 O | O1  | 0.60904 | 0.45914 | 0.30925 | 1.000 | 1.000 | 1a | 1 |
| 170 H | H1  | 0.60784 | 0.46633 | 0.34817 | 1.000 | 1.000 | 1a | 1 |
| 171 H | H2  | 0.69982 | 0.21479 | 0.30475 | 1.000 | 1.000 | 1a | 1 |

=====  
=====

## NiCoP H\*+OH\*

Title CoNiP(0\0\2)

Lattice type P

Space group name P 1

Space group number 1

Setting number 1

### Lattice parameters

| a       | b        | c        | alpha   | beta    | gamma   |
|---------|----------|----------|---------|---------|---------|
| 9.95430 | 11.49420 | 25.00000 | 90.0000 | 90.0000 | 90.0000 |

Unit-cell volume = 2860.417794 Å<sup>3</sup>

### Structure parameters

|    |         | x       | y       | z       | Occ.  | U     | Site | Sym. |
|----|---------|---------|---------|---------|-------|-------|------|------|
| 1  | Co Co1  | 0.00000 | 0.36922 | 0.06562 | 1.000 | 1.000 | 1a   | 1    |
| 2  | Co Co2  | 0.00000 | 0.86922 | 0.06562 | 1.000 | 1.000 | 1a   | 1    |
| 3  | Co Co3  | 0.13078 | 0.06539 | 0.06562 | 1.000 | 1.000 | 1a   | 1    |
| 4  | Co Co4  | 0.13078 | 0.56539 | 0.06562 | 1.000 | 1.000 | 1a   | 1    |
| 5  | Co Co5  | 0.36922 | 0.31539 | 0.06562 | 1.000 | 1.000 | 1a   | 1    |
| 6  | Co Co6  | 0.36922 | 0.81539 | 0.06562 | 1.000 | 1.000 | 1a   | 1    |
| 7  | Co Co7  | 0.50000 | 0.11922 | 0.06562 | 1.000 | 1.000 | 1a   | 1    |
| 8  | Co Co8  | 0.50000 | 0.61922 | 0.06562 | 1.000 | 1.000 | 1a   | 1    |
| 9  | Co Co9  | 0.63078 | 0.31539 | 0.06562 | 1.000 | 1.000 | 1a   | 1    |
| 10 | Co Co10 | 0.63078 | 0.81539 | 0.06562 | 1.000 | 1.000 | 1a   | 1    |
| 11 | Co Co11 | 0.86922 | 0.06539 | 0.06562 | 1.000 | 1.000 | 1a   | 1    |
| 12 | Co Co12 | 0.86922 | 0.56539 | 0.06562 | 1.000 | 1.000 | 1a   | 1    |
| 13 | Co Co13 | 0.00039 | 0.36951 | 0.19883 | 1.000 | 1.000 | 1a   | 1    |
| 14 | Co Co14 | 0.00056 | 0.86907 | 0.19862 | 1.000 | 1.000 | 1a   | 1    |
| 15 | Co Co15 | 0.13146 | 0.06352 | 0.19662 | 1.000 | 1.000 | 1a   | 1    |
| 16 | Co Co16 | 0.13460 | 0.55997 | 0.20030 | 1.000 | 1.000 | 1a   | 1    |
| 17 | Co Co17 | 0.36732 | 0.31729 | 0.19639 | 1.000 | 1.000 | 1a   | 1    |
| 18 | Co Co18 | 0.36760 | 0.81083 | 0.19994 | 1.000 | 1.000 | 1a   | 1    |
| 19 | Co Co19 | 0.49332 | 0.11972 | 0.20004 | 1.000 | 1.000 | 1a   | 1    |
| 20 | Co Co20 | 0.50071 | 0.61988 | 0.19802 | 1.000 | 1.000 | 1a   | 1    |
| 21 | Co Co21 | 0.62708 | 0.31757 | 0.19984 | 1.000 | 1.000 | 1a   | 1    |
| 22 | Co Co22 | 0.63167 | 0.81551 | 0.19783 | 1.000 | 1.000 | 1a   | 1    |

|       |      |         |         |         |       |       |    |   |
|-------|------|---------|---------|---------|-------|-------|----|---|
| 23 Co | Co23 | 0.87085 | 0.06942 | 0.20119 | 1.000 | 1.000 | 1a | 1 |
| 24 Co | Co24 | 0.87012 | 0.56516 | 0.19820 | 1.000 | 1.000 | 1a | 1 |
| 25 Ni | Ni1  | 0.00000 | 0.19753 | 0.00000 | 1.000 | 1.000 | 1a | 1 |
| 26 Ni | Ni2  | 0.00000 | 0.69753 | 0.00000 | 1.000 | 1.000 | 1a | 1 |
| 27 Ni | Ni3  | 0.19753 | 0.40124 | 0.00000 | 1.000 | 1.000 | 1a | 1 |
| 28 Ni | Ni4  | 0.19753 | 0.90124 | 0.00000 | 1.000 | 1.000 | 1a | 1 |
| 29 Ni | Ni5  | 0.30247 | 0.15124 | 0.00000 | 1.000 | 1.000 | 1a | 1 |
| 30 Ni | Ni6  | 0.30247 | 0.65124 | 0.00000 | 1.000 | 1.000 | 1a | 1 |
| 31 Ni | Ni7  | 0.50000 | 0.44753 | 0.00000 | 1.000 | 1.000 | 1a | 1 |
| 32 Ni | Ni8  | 0.50000 | 0.94753 | 0.00000 | 1.000 | 1.000 | 1a | 1 |
| 33 Ni | Ni9  | 0.69753 | 0.15124 | 0.00000 | 1.000 | 1.000 | 1a | 1 |
| 34 Ni | Ni10 | 0.69753 | 0.65124 | 0.00000 | 1.000 | 1.000 | 1a | 1 |
| 35 Ni | Ni11 | 0.80247 | 0.40124 | 0.00000 | 1.000 | 1.000 | 1a | 1 |
| 36 Ni | Ni12 | 0.80247 | 0.90124 | 0.00000 | 1.000 | 1.000 | 1a | 1 |
| 37 Ni | Ni13 | 0.00000 | 0.19753 | 0.13125 | 1.000 | 1.000 | 1a | 1 |
| 38 Ni | Ni14 | 0.00000 | 0.69753 | 0.13125 | 1.000 | 1.000 | 1a | 1 |
| 39 Ni | Ni15 | 0.19753 | 0.40124 | 0.13125 | 1.000 | 1.000 | 1a | 1 |
| 40 Ni | Ni16 | 0.19753 | 0.90124 | 0.13125 | 1.000 | 1.000 | 1a | 1 |
| 41 Ni | Ni17 | 0.30247 | 0.15124 | 0.13125 | 1.000 | 1.000 | 1a | 1 |
| 42 Ni | Ni18 | 0.30247 | 0.65124 | 0.13125 | 1.000 | 1.000 | 1a | 1 |
| 43 Ni | Ni19 | 0.50000 | 0.44753 | 0.13125 | 1.000 | 1.000 | 1a | 1 |
| 44 Ni | Ni20 | 0.50000 | 0.94753 | 0.13125 | 1.000 | 1.000 | 1a | 1 |
| 45 Ni | Ni21 | 0.69753 | 0.15124 | 0.13125 | 1.000 | 1.000 | 1a | 1 |
| 46 Ni | Ni22 | 0.69753 | 0.65124 | 0.13125 | 1.000 | 1.000 | 1a | 1 |
| 47 Ni | Ni23 | 0.80247 | 0.40124 | 0.13125 | 1.000 | 1.000 | 1a | 1 |
| 48 Ni | Ni24 | 0.80247 | 0.90124 | 0.13125 | 1.000 | 1.000 | 1a | 1 |
| 49 Ni | Ni25 | 0.02401 | 0.19444 | 0.26392 | 1.000 | 1.000 | 1a | 1 |
| 50 Ni | Ni26 | 0.00037 | 0.69281 | 0.26034 | 1.000 | 1.000 | 1a | 1 |
| 51 Ni | Ni27 | 0.18517 | 0.38342 | 0.26774 | 1.000 | 1.000 | 1a | 1 |
| 52 Ni | Ni28 | 0.19376 | 0.90198 | 0.26079 | 1.000 | 1.000 | 1a | 1 |
| 53 Ni | Ni29 | 0.29037 | 0.16559 | 0.26274 | 1.000 | 1.000 | 1a | 1 |
| 54 Ni | Ni30 | 0.31051 | 0.64881 | 0.26450 | 1.000 | 1.000 | 1a | 1 |
| 55 Ni | Ni31 | 0.49433 | 0.44406 | 0.26381 | 1.000 | 1.000 | 1a | 1 |
| 56 Ni | Ni32 | 0.50090 | 0.94204 | 0.26028 | 1.000 | 1.000 | 1a | 1 |
| 57 Ni | Ni33 | 0.68805 | 0.15383 | 0.26099 | 1.000 | 1.000 | 1a | 1 |
| 58 Ni | Ni34 | 0.69656 | 0.65233 | 0.26009 | 1.000 | 1.000 | 1a | 1 |
| 59 Ni | Ni35 | 0.80499 | 0.40510 | 0.26102 | 1.000 | 1.000 | 1a | 1 |
| 60 Ni | Ni36 | 0.80657 | 0.90093 | 0.26001 | 1.000 | 1.000 | 1a | 1 |
| 61 P  | P1   | 0.00000 | 0.00000 | 0.00000 | 1.000 | 1.000 | 1a | 1 |
| 62 P  | P2   | 0.00000 | 0.50000 | 0.00000 | 1.000 | 1.000 | 1a | 1 |
| 63 P  | P3   | 0.50000 | 0.25000 | 0.00000 | 1.000 | 1.000 | 1a | 1 |
| 64 P  | P4   | 0.50000 | 0.75000 | 0.00000 | 1.000 | 1.000 | 1a | 1 |
| 65 P  | P5   | 0.16667 | 0.25000 | 0.06562 | 1.000 | 1.000 | 1a | 1 |
| 66 P  | P6   | 0.16667 | 0.75000 | 0.06562 | 1.000 | 1.000 | 1a | 1 |



|      |     |          |          |         |       |       |    |   |
|------|-----|----------|----------|---------|-------|-------|----|---|
| 67 P | P7  | 0.33333  | 0.00000  | 0.06562 | 1.000 | 1.000 | 1a | 1 |
| 68 P | P8  | 0.33333  | 0.50000  | 0.06562 | 1.000 | 1.000 | 1a | 1 |
| 69 P | P9  | 0.66667  | 0.00000  | 0.06562 | 1.000 | 1.000 | 1a | 1 |
| 70 P | P10 | 0.66667  | 0.50000  | 0.06562 | 1.000 | 1.000 | 1a | 1 |
| 71 P | P11 | 0.83333  | 0.25000  | 0.06562 | 1.000 | 1.000 | 1a | 1 |
| 72 P | P12 | 0.83333  | 0.75000  | 0.06562 | 1.000 | 1.000 | 1a | 1 |
| 73 P | P13 | 0.00000  | 0.00000  | 0.13125 | 1.000 | 1.000 | 1a | 1 |
| 74 P | P14 | 0.00000  | 0.50000  | 0.13125 | 1.000 | 1.000 | 1a | 1 |
| 75 P | P15 | 0.50000  | 0.25000  | 0.13125 | 1.000 | 1.000 | 1a | 1 |
| 76 P | P16 | 0.50000  | 0.75000  | 0.13125 | 1.000 | 1.000 | 1a | 1 |
| 77 P | P17 | 0.16580  | 0.24953  | 0.19468 | 1.000 | 1.000 | 1a | 1 |
| 78 P | P18 | 0.16669  | 0.74676  | 0.20278 | 1.000 | 1.000 | 1a | 1 |
| 79 P | P19 | 0.33207  | -0.00228 | 0.20246 | 1.000 | 1.000 | 1a | 1 |
| 80 P | P20 | 0.33605  | 0.50061  | 0.19437 | 1.000 | 1.000 | 1a | 1 |
| 81 P | P21 | 0.66628  | 0.00225  | 0.20247 | 1.000 | 1.000 | 1a | 1 |
| 82 P | P22 | 0.66663  | 0.50046  | 0.20219 | 1.000 | 1.000 | 1a | 1 |
| 83 P | P23 | 0.83188  | 0.25216  | 0.20393 | 1.000 | 1.000 | 1a | 1 |
| 84 P | P24 | 0.83361  | 0.75007  | 0.20006 | 1.000 | 1.000 | 1a | 1 |
| 85 P | P25 | 0.00180  | 0.99877  | 0.26685 | 1.000 | 1.000 | 1a | 1 |
| 86 P | P26 | -0.00027 | 0.49783  | 0.26722 | 1.000 | 1.000 | 1a | 1 |
| 87 P | P27 | 0.49386  | 0.24979  | 0.26673 | 1.000 | 1.000 | 1a | 1 |
| 88 P | P28 | 0.50396  | 0.74981  | 0.26717 | 1.000 | 1.000 | 1a | 1 |
| 89 O | O1  | 0.32947  | 0.49586  | 0.30760 | 1.000 | 1.000 | 1a | 1 |
| 90 H | H1  | 0.33741  | 0.49880  | 0.34645 | 1.000 | 1.000 | 1a | 1 |
| 91 H | H2  | 0.16510  | 0.24178  | 0.29964 | 1.000 | 1.000 | 1a | 1 |

=====  
 ===

## Hydrogen adsorption process

### CoP H\*

=====  
 ===

Title CoP(2\0\0)

Lattice type P  
 Space group name P 1  
 Space group number 1  
 Setting number 1

Lattice parameters

| a        | b        | c        | alpha   | beta    | gamma   |
|----------|----------|----------|---------|---------|---------|
| 10.05150 | 11.00530 | 25.00000 | 90.0000 | 90.0000 | 90.0000 |

Unit-cell volume = 2765.494303 Å<sup>3</sup>

Structure parameters

|    |         | x       | y       | z       | Occ.  | U     | Site | Sym. |
|----|---------|---------|---------|---------|-------|-------|------|------|
| 1  | Co Co1  | 0.24946 | 0.34874 | 0.00000 | 1.000 | 1.000 | 1a   | 1    |
| 2  | Co Co2  | 0.24946 | 0.84874 | 0.00000 | 1.000 | 1.000 | 1a   | 1    |
| 3  | Co Co3  | 0.49946 | 0.40126 | 0.00000 | 1.000 | 1.000 | 1a   | 1    |
| 4  | Co Co4  | 0.49946 | 0.90126 | 0.00000 | 1.000 | 1.000 | 1a   | 1    |
| 5  | Co Co5  | 0.74946 | 0.34874 | 0.00000 | 1.000 | 1.000 | 1a   | 1    |
| 6  | Co Co6  | 0.74946 | 0.84874 | 0.00000 | 1.000 | 1.000 | 1a   | 1    |
| 7  | Co Co7  | 0.99946 | 0.40126 | 0.00000 | 1.000 | 1.000 | 1a   | 1    |
| 8  | Co Co8  | 0.99946 | 0.90126 | 0.00000 | 1.000 | 1.000 | 1a   | 1    |
| 9  | Co Co9  | 0.00054 | 0.09874 | 0.06562 | 1.000 | 1.000 | 1a   | 1    |
| 10 | Co Co10 | 0.00054 | 0.59874 | 0.06562 | 1.000 | 1.000 | 1a   | 1    |
| 11 | Co Co11 | 0.25054 | 0.15126 | 0.06562 | 1.000 | 1.000 | 1a   | 1    |
| 12 | Co Co12 | 0.25054 | 0.65126 | 0.06562 | 1.000 | 1.000 | 1a   | 1    |
| 13 | Co Co13 | 0.50054 | 0.09874 | 0.06562 | 1.000 | 1.000 | 1a   | 1    |
| 14 | Co Co14 | 0.50054 | 0.59874 | 0.06562 | 1.000 | 1.000 | 1a   | 1    |
| 15 | Co Co15 | 0.75054 | 0.15126 | 0.06562 | 1.000 | 1.000 | 1a   | 1    |
| 16 | Co Co16 | 0.75054 | 0.65126 | 0.06562 | 1.000 | 1.000 | 1a   | 1    |
| 17 | Co Co17 | 0.24946 | 0.34874 | 0.13125 | 1.000 | 1.000 | 1a   | 1    |
| 18 | Co Co18 | 0.24946 | 0.84874 | 0.13125 | 1.000 | 1.000 | 1a   | 1    |
| 19 | Co Co19 | 0.49946 | 0.40126 | 0.13125 | 1.000 | 1.000 | 1a   | 1    |
| 20 | Co Co20 | 0.49946 | 0.90126 | 0.13125 | 1.000 | 1.000 | 1a   | 1    |
| 21 | Co Co21 | 0.74946 | 0.34874 | 0.13125 | 1.000 | 1.000 | 1a   | 1    |
| 22 | Co Co22 | 0.74946 | 0.84874 | 0.13125 | 1.000 | 1.000 | 1a   | 1    |
| 23 | Co Co23 | 0.99946 | 0.40126 | 0.13125 | 1.000 | 1.000 | 1a   | 1    |
| 24 | Co Co24 | 0.99946 | 0.90126 | 0.13125 | 1.000 | 1.000 | 1a   | 1    |
| 25 | Co Co25 | 0.99782 | 0.10244 | 0.19589 | 1.000 | 1.000 | 1a   | 1    |
| 26 | Co Co26 | 0.99782 | 0.60244 | 0.19589 | 1.000 | 1.000 | 1a   | 1    |
| 27 | Co Co27 | 0.24781 | 0.14756 | 0.19589 | 1.000 | 1.000 | 1a   | 1    |
| 28 | Co Co28 | 0.24781 | 0.64756 | 0.19589 | 1.000 | 1.000 | 1a   | 1    |
| 29 | Co Co29 | 0.49782 | 0.10244 | 0.19589 | 1.000 | 1.000 | 1a   | 1    |
| 30 | Co Co30 | 0.49782 | 0.60244 | 0.19589 | 1.000 | 1.000 | 1a   | 1    |
| 31 | Co Co31 | 0.74782 | 0.14756 | 0.19589 | 1.000 | 1.000 | 1a   | 1    |
| 32 | Co Co32 | 0.74782 | 0.64756 | 0.19589 | 1.000 | 1.000 | 1a   | 1    |
| 33 | Co Co33 | 0.25209 | 0.34756 | 0.25116 | 1.000 | 1.000 | 1a   | 1    |
| 34 | Co Co34 | 0.25209 | 0.84756 | 0.25116 | 1.000 | 1.000 | 1a   | 1    |
| 35 | Co Co35 | 0.50209 | 0.40244 | 0.25116 | 1.000 | 1.000 | 1a   | 1    |
| 36 | Co Co36 | 0.50209 | 0.90244 | 0.25116 | 1.000 | 1.000 | 1a   | 1    |
| 37 | Co Co37 | 0.75209 | 0.34756 | 0.25116 | 1.000 | 1.000 | 1a   | 1    |
| 38 | Co Co38 | 0.75209 | 0.84756 | 0.25116 | 1.000 | 1.000 | 1a   | 1    |

|       |      |         |         |         |       |       |    |   |
|-------|------|---------|---------|---------|-------|-------|----|---|
| 39 Co | Co39 | 0.00209 | 0.40244 | 0.25116 | 1.000 | 1.000 | 1a | 1 |
| 40 Co | Co40 | 0.00209 | 0.90244 | 0.25116 | 1.000 | 1.000 | 1a | 1 |
| 41 P  | P1   | 0.09583 | 0.20919 | 0.00000 | 1.000 | 1.000 | 1a | 1 |
| 42 P  | P2   | 0.09583 | 0.70919 | 0.00000 | 1.000 | 1.000 | 1a | 1 |
| 43 P  | P3   | 0.34583 | 0.04081 | 0.00000 | 1.000 | 1.000 | 1a | 1 |
| 44 P  | P4   | 0.34583 | 0.54081 | 0.00000 | 1.000 | 1.000 | 1a | 1 |
| 45 P  | P5   | 0.59583 | 0.20919 | 0.00000 | 1.000 | 1.000 | 1a | 1 |
| 46 P  | P6   | 0.59583 | 0.70919 | 0.00000 | 1.000 | 1.000 | 1a | 1 |
| 47 P  | P7   | 0.84583 | 0.04081 | 0.00000 | 1.000 | 1.000 | 1a | 1 |
| 48 P  | P8   | 0.84583 | 0.54081 | 0.00000 | 1.000 | 1.000 | 1a | 1 |
| 49 P  | P9   | 0.15417 | 0.45919 | 0.06562 | 1.000 | 1.000 | 1a | 1 |
| 50 P  | P10  | 0.15417 | 0.95919 | 0.06562 | 1.000 | 1.000 | 1a | 1 |
| 51 P  | P11  | 0.40417 | 0.29081 | 0.06562 | 1.000 | 1.000 | 1a | 1 |
| 52 P  | P12  | 0.40417 | 0.79081 | 0.06562 | 1.000 | 1.000 | 1a | 1 |
| 53 P  | P13  | 0.65417 | 0.45919 | 0.06562 | 1.000 | 1.000 | 1a | 1 |
| 54 P  | P14  | 0.65417 | 0.95919 | 0.06562 | 1.000 | 1.000 | 1a | 1 |
| 55 P  | P15  | 0.90417 | 0.29081 | 0.06562 | 1.000 | 1.000 | 1a | 1 |
| 56 P  | P16  | 0.90417 | 0.79081 | 0.06562 | 1.000 | 1.000 | 1a | 1 |
| 57 P  | P17  | 0.09583 | 0.20919 | 0.13125 | 1.000 | 1.000 | 1a | 1 |
| 58 P  | P18  | 0.09583 | 0.70919 | 0.13125 | 1.000 | 1.000 | 1a | 1 |
| 59 P  | P19  | 0.34583 | 0.04081 | 0.13125 | 1.000 | 1.000 | 1a | 1 |
| 60 P  | P20  | 0.34583 | 0.54081 | 0.13125 | 1.000 | 1.000 | 1a | 1 |
| 61 P  | P21  | 0.59583 | 0.20919 | 0.13125 | 1.000 | 1.000 | 1a | 1 |
| 62 P  | P22  | 0.59583 | 0.70919 | 0.13125 | 1.000 | 1.000 | 1a | 1 |
| 63 P  | P23  | 0.84583 | 0.04081 | 0.13125 | 1.000 | 1.000 | 1a | 1 |
| 64 P  | P24  | 0.84583 | 0.54081 | 0.13125 | 1.000 | 1.000 | 1a | 1 |
| 65 P  | P25  | 0.15513 | 0.46395 | 0.19702 | 1.000 | 1.000 | 1a | 1 |
| 66 P  | P26  | 0.15513 | 0.96395 | 0.19702 | 1.000 | 1.000 | 1a | 1 |
| 67 P  | P27  | 0.40513 | 0.28605 | 0.19702 | 1.000 | 1.000 | 1a | 1 |
| 68 P  | P28  | 0.40513 | 0.78605 | 0.19702 | 1.000 | 1.000 | 1a | 1 |
| 69 P  | P29  | 0.65513 | 0.46395 | 0.19702 | 1.000 | 1.000 | 1a | 1 |
| 70 P  | P30  | 0.65513 | 0.96395 | 0.19702 | 1.000 | 1.000 | 1a | 1 |
| 71 P  | P31  | 0.90513 | 0.28605 | 0.19702 | 1.000 | 1.000 | 1a | 1 |
| 72 P  | P32  | 0.90513 | 0.78605 | 0.19702 | 1.000 | 1.000 | 1a | 1 |
| 73 P  | P33  | 0.08905 | 0.22099 | 0.26578 | 1.000 | 1.000 | 1a | 1 |
| 74 P  | P34  | 0.08905 | 0.72099 | 0.26578 | 1.000 | 1.000 | 1a | 1 |
| 75 P  | P35  | 0.33904 | 0.02901 | 0.26578 | 1.000 | 1.000 | 1a | 1 |
| 76 P  | P36  | 0.33904 | 0.52901 | 0.26578 | 1.000 | 1.000 | 1a | 1 |
| 77 P  | P37  | 0.58904 | 0.22099 | 0.26578 | 1.000 | 1.000 | 1a | 1 |
| 78 P  | P38  | 0.58904 | 0.72099 | 0.26578 | 1.000 | 1.000 | 1a | 1 |
| 79 P  | P39  | 0.83904 | 0.02901 | 0.26578 | 1.000 | 1.000 | 1a | 1 |
| 80 P  | P40  | 0.83904 | 0.52901 | 0.26578 | 1.000 | 1.000 | 1a | 1 |
| 81 H  | H1   | 0.39453 | 0.33355 | 0.28970 | 1.000 | 1.000 | 1a | 1 |

=====  
**NiCoP-CoP H\***  
=====

=====  
Title                   opt-Test

Lattice type            P  
Space group name       P 1  
Space group number     1  
Setting number         1

Lattice parameters

| a        | b        | c        | alpha   | beta    | gamma   |
|----------|----------|----------|---------|---------|---------|
| 20.00560 | 11.24700 | 25.00000 | 90.0000 | 90.0000 | 90.0000 |

Unit-cell volume = 5625.074443 Å<sup>3</sup>

Structure parameters

|    |         | x       | y       | z       | Occ.  | U     | Site | Sym. |
|----|---------|---------|---------|---------|-------|-------|------|------|
| 1  | Co Co1  | 0.00675 | 0.40905 | 0.00000 | 1.000 | 1.000 | 1a   | 1    |
| 2  | Co Co2  | 0.00675 | 0.90905 | 0.00000 | 1.000 | 1.000 | 1a   | 1    |
| 3  | Co Co3  | 0.12814 | 0.34862 | 0.00000 | 1.000 | 1.000 | 1a   | 1    |
| 4  | Co Co4  | 0.12814 | 0.84862 | 0.00000 | 1.000 | 1.000 | 1a   | 1    |
| 5  | Co Co5  | 0.25523 | 0.39733 | 0.00000 | 1.000 | 1.000 | 1a   | 1    |
| 6  | Co Co6  | 0.25523 | 0.89733 | 0.00000 | 1.000 | 1.000 | 1a   | 1    |
| 7  | Co Co7  | 0.38277 | 0.35161 | 0.00000 | 1.000 | 1.000 | 1a   | 1    |
| 8  | Co Co8  | 0.38277 | 0.85161 | 0.00000 | 1.000 | 1.000 | 1a   | 1    |
| 9  | Co Co9  | 0.01686 | 0.09208 | 0.06562 | 1.000 | 1.000 | 1a   | 1    |
| 10 | Co Co10 | 0.01686 | 0.59208 | 0.06562 | 1.000 | 1.000 | 1a   | 1    |
| 11 | Co Co11 | 0.13517 | 0.14703 | 0.06562 | 1.000 | 1.000 | 1a   | 1    |
| 12 | Co Co12 | 0.13517 | 0.64703 | 0.06562 | 1.000 | 1.000 | 1a   | 1    |
| 13 | Co Co13 | 0.25705 | 0.10125 | 0.06562 | 1.000 | 1.000 | 1a   | 1    |
| 14 | Co Co14 | 0.25705 | 0.60125 | 0.06562 | 1.000 | 1.000 | 1a   | 1    |
| 15 | Co Co15 | 0.37959 | 0.14467 | 0.06562 | 1.000 | 1.000 | 1a   | 1    |
| 16 | Co Co16 | 0.37959 | 0.64467 | 0.06562 | 1.000 | 1.000 | 1a   | 1    |
| 17 | Co Co17 | 0.50387 | 0.08464 | 0.06562 | 1.000 | 1.000 | 1a   | 1    |
| 18 | Co Co18 | 0.50387 | 0.58464 | 0.06562 | 1.000 | 1.000 | 1a   | 1    |
| 19 | Co Co19 | 0.58720 | 0.27888 | 0.06562 | 1.000 | 1.000 | 1a   | 1    |
| 20 | Co Co20 | 0.58720 | 0.77888 | 0.06562 | 1.000 | 1.000 | 1a   | 1    |
| 21 | Co Co21 | 0.70394 | 0.02381 | 0.06562 | 1.000 | 1.000 | 1a   | 1    |
| 22 | Co Co22 | 0.70394 | 0.52381 | 0.06562 | 1.000 | 1.000 | 1a   | 1    |

|       |      |         |         |         |       |       |    |   |
|-------|------|---------|---------|---------|-------|-------|----|---|
| 23 Co | Co23 | 0.77258 | 0.32820 | 0.06562 | 1.000 | 1.000 | 1a | 1 |
| 24 Co | Co24 | 0.77258 | 0.82820 | 0.06562 | 1.000 | 1.000 | 1a | 1 |
| 25 Co | Co25 | 0.83653 | 0.02678 | 0.06562 | 1.000 | 1.000 | 1a | 1 |
| 26 Co | Co26 | 0.83653 | 0.52678 | 0.06562 | 1.000 | 1.000 | 1a | 1 |
| 27 Co | Co27 | 0.95638 | 0.27536 | 0.06562 | 1.000 | 1.000 | 1a | 1 |
| 28 Co | Co28 | 0.95638 | 0.77536 | 0.06562 | 1.000 | 1.000 | 1a | 1 |
| 29 Co | Co29 | 0.01381 | 0.40341 | 0.13125 | 1.000 | 1.000 | 1a | 1 |
| 30 Co | Co30 | 0.01381 | 0.90341 | 0.13125 | 1.000 | 1.000 | 1a | 1 |
| 31 Co | Co31 | 0.13239 | 0.34729 | 0.13125 | 1.000 | 1.000 | 1a | 1 |
| 32 Co | Co32 | 0.13239 | 0.84729 | 0.13125 | 1.000 | 1.000 | 1a | 1 |
| 33 Co | Co33 | 0.25310 | 0.39909 | 0.13125 | 1.000 | 1.000 | 1a | 1 |
| 34 Co | Co34 | 0.25310 | 0.89909 | 0.13125 | 1.000 | 1.000 | 1a | 1 |
| 35 Co | Co35 | 0.37623 | 0.35070 | 0.13125 | 1.000 | 1.000 | 1a | 1 |
| 36 Co | Co36 | 0.37623 | 0.85070 | 0.13125 | 1.000 | 1.000 | 1a | 1 |
| 37 Co | Co37 | 0.01511 | 0.09433 | 0.19658 | 1.000 | 1.000 | 1a | 1 |
| 38 Co | Co38 | 0.01511 | 0.59437 | 0.19658 | 1.000 | 1.000 | 1a | 1 |
| 39 Co | Co39 | 0.13329 | 0.14019 | 0.19716 | 1.000 | 1.000 | 1a | 1 |
| 40 Co | Co40 | 0.13329 | 0.64020 | 0.19715 | 1.000 | 1.000 | 1a | 1 |
| 41 Co | Co41 | 0.25546 | 0.10285 | 0.19867 | 1.000 | 1.000 | 1a | 1 |
| 42 Co | Co42 | 0.25546 | 0.60285 | 0.19867 | 1.000 | 1.000 | 1a | 1 |
| 43 Co | Co43 | 0.37818 | 0.14654 | 0.19774 | 1.000 | 1.000 | 1a | 1 |
| 44 Co | Co44 | 0.37818 | 0.64654 | 0.19774 | 1.000 | 1.000 | 1a | 1 |
| 45 Co | Co45 | 0.50416 | 0.09552 | 0.20277 | 1.000 | 1.000 | 1a | 1 |
| 46 Co | Co46 | 0.50416 | 0.59552 | 0.20277 | 1.000 | 1.000 | 1a | 1 |
| 47 Co | Co47 | 0.58422 | 0.27676 | 0.19929 | 1.000 | 1.000 | 1a | 1 |
| 48 Co | Co48 | 0.58422 | 0.77676 | 0.19929 | 1.000 | 1.000 | 1a | 1 |
| 49 Co | Co49 | 0.70382 | 0.01977 | 0.19876 | 1.000 | 1.000 | 1a | 1 |
| 50 Co | Co50 | 0.70382 | 0.51977 | 0.19876 | 1.000 | 1.000 | 1a | 1 |
| 51 Co | Co51 | 0.77157 | 0.32765 | 0.19826 | 1.000 | 1.000 | 1a | 1 |
| 52 Co | Co52 | 0.77157 | 0.82764 | 0.19827 | 1.000 | 1.000 | 1a | 1 |
| 53 Co | Co53 | 0.83376 | 0.02583 | 0.20071 | 1.000 | 1.000 | 1a | 1 |
| 54 Co | Co54 | 0.83377 | 0.52583 | 0.20071 | 1.000 | 1.000 | 1a | 1 |
| 55 Co | Co55 | 0.95558 | 0.27964 | 0.19777 | 1.000 | 1.000 | 1a | 1 |
| 56 Co | Co56 | 0.95558 | 0.77967 | 0.19778 | 1.000 | 1.000 | 1a | 1 |
| 57 Co | Co57 | 0.00828 | 0.41550 | 0.26112 | 1.000 | 1.000 | 1a | 1 |
| 58 Co | Co58 | 0.00830 | 0.91545 | 0.26112 | 1.000 | 1.000 | 1a | 1 |
| 59 Co | Co59 | 0.12783 | 0.33960 | 0.25401 | 1.000 | 1.000 | 1a | 1 |
| 60 Co | Co60 | 0.12785 | 0.83959 | 0.25401 | 1.000 | 1.000 | 1a | 1 |
| 61 Co | Co61 | 0.25537 | 0.39830 | 0.25065 | 1.000 | 1.000 | 1a | 1 |
| 62 Co | Co62 | 0.25538 | 0.89831 | 0.25065 | 1.000 | 1.000 | 1a | 1 |
| 63 Co | Co63 | 0.38147 | 0.35073 | 0.25276 | 1.000 | 1.000 | 1a | 1 |
| 64 Co | Co64 | 0.38147 | 0.85073 | 0.25277 | 1.000 | 1.000 | 1a | 1 |
| 65 Ni | Ni1  | 0.51052 | 0.40283 | 0.00000 | 1.000 | 1.000 | 1a | 1 |
| 66 Ni | Ni2  | 0.51052 | 0.90283 | 0.00000 | 1.000 | 1.000 | 1a | 1 |

|        |      |         |         |         |       |       |    |   |
|--------|------|---------|---------|---------|-------|-------|----|---|
| 67 Ni  | Ni3  | 0.62146 | 0.10806 | 0.00000 | 1.000 | 1.000 | 1a | 1 |
| 68 Ni  | Ni4  | 0.62146 | 0.60806 | 0.00000 | 1.000 | 1.000 | 1a | 1 |
| 69 Ni  | Ni5  | 0.67694 | 0.35784 | 0.00000 | 1.000 | 1.000 | 1a | 1 |
| 70 Ni  | Ni6  | 0.67694 | 0.85784 | 0.00000 | 1.000 | 1.000 | 1a | 1 |
| 71 Ni  | Ni7  | 0.76923 | 0.15455 | 0.00000 | 1.000 | 1.000 | 1a | 1 |
| 72 Ni  | Ni8  | 0.76923 | 0.65455 | 0.00000 | 1.000 | 1.000 | 1a | 1 |
| 73 Ni  | Ni9  | 0.86953 | 0.35916 | 0.00000 | 1.000 | 1.000 | 1a | 1 |
| 74 Ni  | Ni10 | 0.86953 | 0.85916 | 0.00000 | 1.000 | 1.000 | 1a | 1 |
| 75 Ni  | Ni11 | 0.93046 | 0.11273 | 0.00000 | 1.000 | 1.000 | 1a | 1 |
| 76 Ni  | Ni12 | 0.93046 | 0.61273 | 0.00000 | 1.000 | 1.000 | 1a | 1 |
| 77 Ni  | Ni13 | 0.50670 | 0.39909 | 0.13125 | 1.000 | 1.000 | 1a | 1 |
| 78 Ni  | Ni14 | 0.50670 | 0.89909 | 0.13125 | 1.000 | 1.000 | 1a | 1 |
| 79 Ni  | Ni15 | 0.62370 | 0.10922 | 0.13125 | 1.000 | 1.000 | 1a | 1 |
| 80 Ni  | Ni16 | 0.62370 | 0.60922 | 0.13125 | 1.000 | 1.000 | 1a | 1 |
| 81 Ni  | Ni17 | 0.67014 | 0.36192 | 0.13125 | 1.000 | 1.000 | 1a | 1 |
| 82 Ni  | Ni18 | 0.67014 | 0.86192 | 0.13125 | 1.000 | 1.000 | 1a | 1 |
| 83 Ni  | Ni19 | 0.77115 | 0.15432 | 0.13125 | 1.000 | 1.000 | 1a | 1 |
| 84 Ni  | Ni20 | 0.77115 | 0.65432 | 0.13125 | 1.000 | 1.000 | 1a | 1 |
| 85 Ni  | Ni21 | 0.87340 | 0.36151 | 0.13125 | 1.000 | 1.000 | 1a | 1 |
| 86 Ni  | Ni22 | 0.87340 | 0.86151 | 0.13125 | 1.000 | 1.000 | 1a | 1 |
| 87 Ni  | Ni23 | 0.91952 | 0.11549 | 0.13125 | 1.000 | 1.000 | 1a | 1 |
| 88 Ni  | Ni24 | 0.91952 | 0.61549 | 0.13125 | 1.000 | 1.000 | 1a | 1 |
| 89 Ni  | Ni25 | 0.50763 | 0.40288 | 0.25357 | 1.000 | 1.000 | 1a | 1 |
| 90 Ni  | Ni26 | 0.50763 | 0.90288 | 0.25357 | 1.000 | 1.000 | 1a | 1 |
| 91 Ni  | Ni27 | 0.62584 | 0.11460 | 0.26340 | 1.000 | 1.000 | 1a | 1 |
| 92 Ni  | Ni28 | 0.62584 | 0.61460 | 0.26340 | 1.000 | 1.000 | 1a | 1 |
| 93 Ni  | Ni29 | 0.67145 | 0.35602 | 0.26233 | 1.000 | 1.000 | 1a | 1 |
| 94 Ni  | Ni30 | 0.67145 | 0.85602 | 0.26233 | 1.000 | 1.000 | 1a | 1 |
| 95 Ni  | Ni31 | 0.76816 | 0.15375 | 0.26327 | 1.000 | 1.000 | 1a | 1 |
| 96 Ni  | Ni32 | 0.76816 | 0.65375 | 0.26327 | 1.000 | 1.000 | 1a | 1 |
| 97 Ni  | Ni33 | 0.86889 | 0.36202 | 0.26253 | 1.000 | 1.000 | 1a | 1 |
| 98 Ni  | Ni34 | 0.86887 | 0.86202 | 0.26254 | 1.000 | 1.000 | 1a | 1 |
| 99 Ni  | Ni35 | 0.92761 | 0.12110 | 0.26343 | 1.000 | 1.000 | 1a | 1 |
| 100 Ni | Ni36 | 0.92761 | 0.62107 | 0.26343 | 1.000 | 1.000 | 1a | 1 |
| 101 P  | P1   | 0.03409 | 0.21848 | 0.00000 | 1.000 | 1.000 | 1a | 1 |
| 102 P  | P2   | 0.03409 | 0.71848 | 0.00000 | 1.000 | 1.000 | 1a | 1 |
| 103 P  | P3   | 0.17390 | 0.02890 | 0.00000 | 1.000 | 1.000 | 1a | 1 |
| 104 P  | P4   | 0.17390 | 0.52890 | 0.00000 | 1.000 | 1.000 | 1a | 1 |
| 105 P  | P5   | 0.29813 | 0.21916 | 0.00000 | 1.000 | 1.000 | 1a | 1 |
| 106 P  | P6   | 0.29813 | 0.71916 | 0.00000 | 1.000 | 1.000 | 1a | 1 |
| 107 P  | P7   | 0.42362 | 0.03145 | 0.00000 | 1.000 | 1.000 | 1a | 1 |
| 108 P  | P8   | 0.42362 | 0.53145 | 0.00000 | 1.000 | 1.000 | 1a | 1 |
| 109 P  | P9   | 0.52912 | 0.20886 | 0.00000 | 1.000 | 1.000 | 1a | 1 |
| 110 P  | P10  | 0.52912 | 0.70886 | 0.00000 | 1.000 | 1.000 | 1a | 1 |

|       |     |         |         |         |       |       |    |   |
|-------|-----|---------|---------|---------|-------|-------|----|---|
| 111 P | P11 | 0.77143 | 0.45725 | 0.00000 | 1.000 | 1.000 | 1a | 1 |
| 112 P | P12 | 0.77143 | 0.95725 | 0.00000 | 1.000 | 1.000 | 1a | 1 |
| 113 P | P13 | 0.08693 | 0.45321 | 0.06562 | 1.000 | 1.000 | 1a | 1 |
| 114 P | P14 | 0.08693 | 0.95321 | 0.06562 | 1.000 | 1.000 | 1a | 1 |
| 115 P | P15 | 0.20538 | 0.29402 | 0.06562 | 1.000 | 1.000 | 1a | 1 |
| 116 P | P16 | 0.20538 | 0.79402 | 0.06562 | 1.000 | 1.000 | 1a | 1 |
| 117 P | P17 | 0.32908 | 0.45438 | 0.06562 | 1.000 | 1.000 | 1a | 1 |
| 118 P | P18 | 0.32908 | 0.95438 | 0.06562 | 1.000 | 1.000 | 1a | 1 |
| 119 P | P19 | 0.44768 | 0.29725 | 0.06562 | 1.000 | 1.000 | 1a | 1 |
| 120 P | P20 | 0.44768 | 0.79725 | 0.06562 | 1.000 | 1.000 | 1a | 1 |
| 121 P | P21 | 0.59766 | 0.46715 | 0.06562 | 1.000 | 1.000 | 1a | 1 |
| 122 P | P22 | 0.59766 | 0.96715 | 0.06562 | 1.000 | 1.000 | 1a | 1 |
| 123 P | P23 | 0.68981 | 0.21162 | 0.06562 | 1.000 | 1.000 | 1a | 1 |
| 124 P | P24 | 0.68981 | 0.71162 | 0.06562 | 1.000 | 1.000 | 1a | 1 |
| 125 P | P25 | 0.85529 | 0.21141 | 0.06562 | 1.000 | 1.000 | 1a | 1 |
| 126 P | P26 | 0.85529 | 0.71141 | 0.06562 | 1.000 | 1.000 | 1a | 1 |
| 127 P | P27 | 0.93738 | 0.46256 | 0.06562 | 1.000 | 1.000 | 1a | 1 |
| 128 P | P28 | 0.93738 | 0.96256 | 0.06562 | 1.000 | 1.000 | 1a | 1 |
| 129 P | P29 | 0.03746 | 0.21394 | 0.13125 | 1.000 | 1.000 | 1a | 1 |
| 130 P | P30 | 0.03746 | 0.71394 | 0.13125 | 1.000 | 1.000 | 1a | 1 |
| 131 P | P31 | 0.17801 | 0.04371 | 0.13125 | 1.000 | 1.000 | 1a | 1 |
| 132 P | P32 | 0.17801 | 0.54371 | 0.13125 | 1.000 | 1.000 | 1a | 1 |
| 133 P | P33 | 0.30152 | 0.20524 | 0.13125 | 1.000 | 1.000 | 1a | 1 |
| 134 P | P34 | 0.30152 | 0.70524 | 0.13125 | 1.000 | 1.000 | 1a | 1 |
| 135 P | P35 | 0.42559 | 0.04086 | 0.13125 | 1.000 | 1.000 | 1a | 1 |
| 136 P | P36 | 0.42559 | 0.54086 | 0.13125 | 1.000 | 1.000 | 1a | 1 |
| 137 P | P37 | 0.53204 | 0.20422 | 0.13125 | 1.000 | 1.000 | 1a | 1 |
| 138 P | P38 | 0.53204 | 0.70422 | 0.13125 | 1.000 | 1.000 | 1a | 1 |
| 139 P | P39 | 0.77155 | 0.45710 | 0.13125 | 1.000 | 1.000 | 1a | 1 |
| 140 P | P40 | 0.77155 | 0.95710 | 0.13125 | 1.000 | 1.000 | 1a | 1 |
| 141 P | P41 | 0.08604 | 0.45685 | 0.19766 | 1.000 | 1.000 | 1a | 1 |
| 142 P | P42 | 0.08603 | 0.95684 | 0.19767 | 1.000 | 1.000 | 1a | 1 |
| 143 P | P43 | 0.20575 | 0.28346 | 0.19697 | 1.000 | 1.000 | 1a | 1 |
| 144 P | P44 | 0.20574 | 0.78347 | 0.19697 | 1.000 | 1.000 | 1a | 1 |
| 145 P | P45 | 0.33229 | 0.46416 | 0.19802 | 1.000 | 1.000 | 1a | 1 |
| 146 P | P46 | 0.33229 | 0.96416 | 0.19802 | 1.000 | 1.000 | 1a | 1 |
| 147 P | P47 | 0.45490 | 0.28309 | 0.19958 | 1.000 | 1.000 | 1a | 1 |
| 148 P | P48 | 0.45490 | 0.78309 | 0.19958 | 1.000 | 1.000 | 1a | 1 |
| 149 P | P49 | 0.59843 | 0.46755 | 0.20590 | 1.000 | 1.000 | 1a | 1 |
| 150 P | P50 | 0.59843 | 0.96755 | 0.20590 | 1.000 | 1.000 | 1a | 1 |
| 151 P | P51 | 0.68844 | 0.20928 | 0.20162 | 1.000 | 1.000 | 1a | 1 |
| 152 P | P52 | 0.68844 | 0.70928 | 0.20161 | 1.000 | 1.000 | 1a | 1 |
| 153 P | P53 | 0.85555 | 0.21052 | 0.20364 | 1.000 | 1.000 | 1a | 1 |
| 154 P | P54 | 0.85555 | 0.71053 | 0.20364 | 1.000 | 1.000 | 1a | 1 |

|       |     |         |         |         |       |       |    |   |
|-------|-----|---------|---------|---------|-------|-------|----|---|
| 155 P | P55 | 0.93437 | 0.46642 | 0.20088 | 1.000 | 1.000 | 1a | 1 |
| 156 P | P56 | 0.93438 | 0.96641 | 0.20090 | 1.000 | 1.000 | 1a | 1 |
| 157 P | P57 | 0.02962 | 0.22356 | 0.26237 | 1.000 | 1.000 | 1a | 1 |
| 158 P | P58 | 0.02963 | 0.72351 | 0.26239 | 1.000 | 1.000 | 1a | 1 |
| 159 P | P59 | 0.17288 | 0.02116 | 0.26330 | 1.000 | 1.000 | 1a | 1 |
| 160 P | P60 | 0.17288 | 0.52117 | 0.26330 | 1.000 | 1.000 | 1a | 1 |
| 161 P | P61 | 0.29991 | 0.22199 | 0.26551 | 1.000 | 1.000 | 1a | 1 |
| 162 P | P62 | 0.29991 | 0.72199 | 0.26551 | 1.000 | 1.000 | 1a | 1 |
| 163 P | P63 | 0.42314 | 0.03063 | 0.26741 | 1.000 | 1.000 | 1a | 1 |
| 164 P | P64 | 0.42314 | 0.53063 | 0.26741 | 1.000 | 1.000 | 1a | 1 |
| 165 P | P65 | 0.54108 | 0.22286 | 0.28026 | 1.000 | 1.000 | 1a | 1 |
| 166 P | P66 | 0.54108 | 0.72286 | 0.28026 | 1.000 | 1.000 | 1a | 1 |
| 167 P | P67 | 0.76882 | 0.45456 | 0.26911 | 1.000 | 1.000 | 1a | 1 |
| 168 P | P68 | 0.76881 | 0.95456 | 0.26912 | 1.000 | 1.000 | 1a | 1 |
| 169 H | H1  | 0.64015 | 0.49295 | 0.29866 | 1.000 | 1.000 | 1a | 1 |

=====  
 ===

### NiCoP H\*

=====  
 ===

Title CoNiP(0\0\2)

Lattice type P  
 Space group name P 1  
 Space group number 1  
 Setting number 1

#### Lattice parameters

| a       | b        | c        | alpha   | beta    | gamma   |
|---------|----------|----------|---------|---------|---------|
| 9.95430 | 11.49420 | 25.00000 | 90.0000 | 90.0000 | 90.0000 |

Unit-cell volume = 2860.417794 Å<sup>3</sup>

#### Structure parameters

|      |     | x       | y       | z       | Occ.  | U     | Site | Sym. |
|------|-----|---------|---------|---------|-------|-------|------|------|
| 1 Co | Co1 | 0.00000 | 0.36922 | 0.06562 | 1.000 | 1.000 | 1a   | 1    |
| 2 Co | Co2 | 0.00000 | 0.86922 | 0.06562 | 1.000 | 1.000 | 1a   | 1    |
| 3 Co | Co3 | 0.13078 | 0.06539 | 0.06562 | 1.000 | 1.000 | 1a   | 1    |
| 4 Co | Co4 | 0.13078 | 0.56539 | 0.06562 | 1.000 | 1.000 | 1a   | 1    |
| 5 Co | Co5 | 0.36922 | 0.31539 | 0.06562 | 1.000 | 1.000 | 1a   | 1    |
| 6 Co | Co6 | 0.36922 | 0.81539 | 0.06562 | 1.000 | 1.000 | 1a   | 1    |



|       |      |         |         |         |       |       |    |   |
|-------|------|---------|---------|---------|-------|-------|----|---|
| 7 Co  | Co7  | 0.50000 | 0.11922 | 0.06562 | 1.000 | 1.000 | 1a | 1 |
| 8 Co  | Co8  | 0.50000 | 0.61922 | 0.06562 | 1.000 | 1.000 | 1a | 1 |
| 9 Co  | Co9  | 0.63078 | 0.31539 | 0.06562 | 1.000 | 1.000 | 1a | 1 |
| 10 Co | Co10 | 0.63078 | 0.81539 | 0.06562 | 1.000 | 1.000 | 1a | 1 |
| 11 Co | Co11 | 0.86922 | 0.06539 | 0.06562 | 1.000 | 1.000 | 1a | 1 |
| 12 Co | Co12 | 0.86922 | 0.56539 | 0.06562 | 1.000 | 1.000 | 1a | 1 |
| 13 Co | Co13 | 0.00000 | 0.36990 | 0.19845 | 1.000 | 1.000 | 1a | 1 |
| 14 Co | Co14 | 0.00000 | 0.86990 | 0.19845 | 1.000 | 1.000 | 1a | 1 |
| 15 Co | Co15 | 0.13094 | 0.06550 | 0.19827 | 1.000 | 1.000 | 1a | 1 |
| 16 Co | Co16 | 0.13094 | 0.56550 | 0.19827 | 1.000 | 1.000 | 1a | 1 |
| 17 Co | Co17 | 0.36906 | 0.31550 | 0.19827 | 1.000 | 1.000 | 1a | 1 |
| 18 Co | Co18 | 0.36906 | 0.81550 | 0.19827 | 1.000 | 1.000 | 1a | 1 |
| 19 Co | Co19 | 0.50000 | 0.11990 | 0.19845 | 1.000 | 1.000 | 1a | 1 |
| 20 Co | Co20 | 0.50000 | 0.61990 | 0.19845 | 1.000 | 1.000 | 1a | 1 |
| 21 Co | Co21 | 0.63094 | 0.31550 | 0.19827 | 1.000 | 1.000 | 1a | 1 |
| 22 Co | Co22 | 0.63094 | 0.81550 | 0.19827 | 1.000 | 1.000 | 1a | 1 |
| 23 Co | Co23 | 0.86906 | 0.06550 | 0.19827 | 1.000 | 1.000 | 1a | 1 |
| 24 Co | Co24 | 0.86906 | 0.56550 | 0.19827 | 1.000 | 1.000 | 1a | 1 |
| 25 Ni | Ni1  | 0.00000 | 0.19753 | 0.00000 | 1.000 | 1.000 | 1a | 1 |
| 26 Ni | Ni2  | 0.00000 | 0.69753 | 0.00000 | 1.000 | 1.000 | 1a | 1 |
| 27 Ni | Ni3  | 0.19753 | 0.40124 | 0.00000 | 1.000 | 1.000 | 1a | 1 |
| 28 Ni | Ni4  | 0.19753 | 0.90124 | 0.00000 | 1.000 | 1.000 | 1a | 1 |
| 29 Ni | Ni5  | 0.30247 | 0.15124 | 0.00000 | 1.000 | 1.000 | 1a | 1 |
| 30 Ni | Ni6  | 0.30247 | 0.65124 | 0.00000 | 1.000 | 1.000 | 1a | 1 |
| 31 Ni | Ni7  | 0.50000 | 0.44753 | 0.00000 | 1.000 | 1.000 | 1a | 1 |
| 32 Ni | Ni8  | 0.50000 | 0.94753 | 0.00000 | 1.000 | 1.000 | 1a | 1 |
| 33 Ni | Ni9  | 0.69753 | 0.15124 | 0.00000 | 1.000 | 1.000 | 1a | 1 |
| 34 Ni | Ni10 | 0.69753 | 0.65124 | 0.00000 | 1.000 | 1.000 | 1a | 1 |
| 35 Ni | Ni11 | 0.80247 | 0.40124 | 0.00000 | 1.000 | 1.000 | 1a | 1 |
| 36 Ni | Ni12 | 0.80247 | 0.90124 | 0.00000 | 1.000 | 1.000 | 1a | 1 |
| 37 Ni | Ni13 | 0.00000 | 0.19753 | 0.13125 | 1.000 | 1.000 | 1a | 1 |
| 38 Ni | Ni14 | 0.00000 | 0.69753 | 0.13125 | 1.000 | 1.000 | 1a | 1 |
| 39 Ni | Ni15 | 0.19753 | 0.40124 | 0.13125 | 1.000 | 1.000 | 1a | 1 |
| 40 Ni | Ni16 | 0.19753 | 0.90124 | 0.13125 | 1.000 | 1.000 | 1a | 1 |
| 41 Ni | Ni17 | 0.30247 | 0.15124 | 0.13125 | 1.000 | 1.000 | 1a | 1 |
| 42 Ni | Ni18 | 0.30247 | 0.65124 | 0.13125 | 1.000 | 1.000 | 1a | 1 |
| 43 Ni | Ni19 | 0.50000 | 0.44753 | 0.13125 | 1.000 | 1.000 | 1a | 1 |
| 44 Ni | Ni20 | 0.50000 | 0.94753 | 0.13125 | 1.000 | 1.000 | 1a | 1 |
| 45 Ni | Ni21 | 0.69753 | 0.15124 | 0.13125 | 1.000 | 1.000 | 1a | 1 |
| 46 Ni | Ni22 | 0.69753 | 0.65124 | 0.13125 | 1.000 | 1.000 | 1a | 1 |
| 47 Ni | Ni23 | 0.80247 | 0.40124 | 0.13125 | 1.000 | 1.000 | 1a | 1 |
| 48 Ni | Ni24 | 0.80247 | 0.90124 | 0.13125 | 1.000 | 1.000 | 1a | 1 |
| 49 Ni | Ni25 | 0.00000 | 0.19434 | 0.26006 | 1.000 | 1.000 | 1a | 1 |
| 50 Ni | Ni26 | 0.00000 | 0.69434 | 0.26006 | 1.000 | 1.000 | 1a | 1 |

|       |      |         |         |         |       |       |    |   |
|-------|------|---------|---------|---------|-------|-------|----|---|
| 51 Ni | Ni27 | 0.19450 | 0.40217 | 0.26022 | 1.000 | 1.000 | 1a | 1 |
| 52 Ni | Ni28 | 0.19450 | 0.90217 | 0.26022 | 1.000 | 1.000 | 1a | 1 |
| 53 Ni | Ni29 | 0.30550 | 0.15217 | 0.26022 | 1.000 | 1.000 | 1a | 1 |
| 54 Ni | Ni30 | 0.30550 | 0.65217 | 0.26022 | 1.000 | 1.000 | 1a | 1 |
| 55 Ni | Ni31 | 0.50000 | 0.44434 | 0.26006 | 1.000 | 1.000 | 1a | 1 |
| 56 Ni | Ni32 | 0.50000 | 0.94434 | 0.26006 | 1.000 | 1.000 | 1a | 1 |
| 57 Ni | Ni33 | 0.69450 | 0.15217 | 0.26022 | 1.000 | 1.000 | 1a | 1 |
| 58 Ni | Ni34 | 0.69450 | 0.65217 | 0.26022 | 1.000 | 1.000 | 1a | 1 |
| 59 Ni | Ni35 | 0.80550 | 0.40217 | 0.26022 | 1.000 | 1.000 | 1a | 1 |
| 60 Ni | Ni36 | 0.80550 | 0.90217 | 0.26022 | 1.000 | 1.000 | 1a | 1 |
| 61 P  | P1   | 0.00000 | 0.00000 | 0.00000 | 1.000 | 1.000 | 1a | 1 |
| 62 P  | P2   | 0.00000 | 0.50000 | 0.00000 | 1.000 | 1.000 | 1a | 1 |
| 63 P  | P3   | 0.50000 | 0.25000 | 0.00000 | 1.000 | 1.000 | 1a | 1 |
| 64 P  | P4   | 0.50000 | 0.75000 | 0.00000 | 1.000 | 1.000 | 1a | 1 |
| 65 P  | P5   | 0.16667 | 0.25000 | 0.06562 | 1.000 | 1.000 | 1a | 1 |
| 66 P  | P6   | 0.16667 | 0.75000 | 0.06562 | 1.000 | 1.000 | 1a | 1 |
| 67 P  | P7   | 0.33333 | 0.00000 | 0.06562 | 1.000 | 1.000 | 1a | 1 |
| 68 P  | P8   | 0.33333 | 0.50000 | 0.06562 | 1.000 | 1.000 | 1a | 1 |
| 69 P  | P9   | 0.66667 | 0.00000 | 0.06562 | 1.000 | 1.000 | 1a | 1 |
| 70 P  | P10  | 0.66667 | 0.50000 | 0.06562 | 1.000 | 1.000 | 1a | 1 |
| 71 P  | P11  | 0.83333 | 0.25000 | 0.06562 | 1.000 | 1.000 | 1a | 1 |
| 72 P  | P12  | 0.83333 | 0.75000 | 0.06562 | 1.000 | 1.000 | 1a | 1 |
| 73 P  | P13  | 0.00000 | 0.00000 | 0.13125 | 1.000 | 1.000 | 1a | 1 |
| 74 P  | P14  | 0.00000 | 0.50000 | 0.13125 | 1.000 | 1.000 | 1a | 1 |
| 75 P  | P15  | 0.50000 | 0.25000 | 0.13125 | 1.000 | 1.000 | 1a | 1 |
| 76 P  | P16  | 0.50000 | 0.75000 | 0.13125 | 1.000 | 1.000 | 1a | 1 |
| 77 P  | P17  | 0.16696 | 0.25025 | 0.20057 | 1.000 | 1.000 | 1a | 1 |
| 78 P  | P18  | 0.16696 | 0.75025 | 0.20057 | 1.000 | 1.000 | 1a | 1 |
| 79 P  | P19  | 0.33303 | 0.00025 | 0.20057 | 1.000 | 1.000 | 1a | 1 |
| 80 P  | P20  | 0.33303 | 0.50025 | 0.20057 | 1.000 | 1.000 | 1a | 1 |
| 81 P  | P21  | 0.66697 | 0.00025 | 0.20057 | 1.000 | 1.000 | 1a | 1 |
| 82 P  | P22  | 0.66697 | 0.50025 | 0.20057 | 1.000 | 1.000 | 1a | 1 |
| 83 P  | P23  | 0.83303 | 0.25025 | 0.20057 | 1.000 | 1.000 | 1a | 1 |
| 84 P  | P24  | 0.83303 | 0.75025 | 0.20057 | 1.000 | 1.000 | 1a | 1 |
| 85 P  | P25  | 0.00000 | 0.99926 | 0.26667 | 1.000 | 1.000 | 1a | 1 |
| 86 P  | P26  | 0.00000 | 0.49926 | 0.26667 | 1.000 | 1.000 | 1a | 1 |
| 87 P  | P27  | 0.50000 | 0.24926 | 0.26667 | 1.000 | 1.000 | 1a | 1 |
| 88 P  | P28  | 0.50000 | 0.74926 | 0.26667 | 1.000 | 1.000 | 1a | 1 |
| 89 H  | H1   | 0.38694 | 0.52281 | 0.29488 | 1.000 | 1.000 | 1a | 1 |

=====  
=====
